# Supplementary material for: Synthesis, structure prediction, pharmacokinetic properties, molecular docking and antitumor activities of some novel thiazinone derivatives
Source: Royal Society of Chemistry journal article supplement (doi:10.1039/c5nj01369k), 2015-01-01
Supplement: c5nj01369k1.pdf [file c5nj01369k1.pdf]

## Synthesis, structure prediction, pharmacokinetic properties, molecular docking and antitumor activities of some novel thiazinone derivatives.

Selvam Athavan Alias Anand,<sup>a</sup> Chandrasekaran Loganathan,<sup>a</sup> Nisha Susan Thomas,<sup>b</sup> Kuppusamy Saravanan,<sup>a</sup> Antony Therasa Alphonsa<sup>a</sup> and Senthamaraikannan Kabilan<sup>\*,a</sup>

<sup>a</sup> Drug Discovery Lab, Department of Chemistry, Annamalai University, Annamalainagar, Tamilnadu – 608002, India.

<sup>b</sup> Department of Bio-Chemistry and Bio-Technology, Annamalai University, Annamalainagar, Tamilnadu – 608002, India.

Email: [profskabilanau@gmail.com](mailto:profskabilanau@gmail.com), Tel: +91 94439 24629

## New Journal of Chemistry

### Supplementary Information

#### Figure Captions

**Fig. S 1** FT-IR spectrum of compound **17**

**Fig. S 2** <sup>1</sup>H NMR spectrum of compound **17**

**Fig. S 3** <sup>13</sup>C NMR spectrum of compound **17**

**Fig. S 4** DEPT spectrum of compound **17**

**Fig. S 5** <sup>1</sup>H-<sup>1</sup>H COSY NMR spectrum of compound **17**

**Fig. S 6** <sup>1</sup>H-<sup>13</sup>C COSY NMR spectrum of compound **17**

**Fig. S 7** HMBC spectrum of compound **17**

**Fig. S 8** HR-Mass spectrum of compound **17**

**Fig. S 9** FT-IR spectrum of compound **18**

**Fig. S 10**  $^1\text{H}$  NMR spectrum of compound **18**

**Fig. S 11**  $^{13}\text{C}$  NMR spectrum of compound **18**

**Fig. S 12** HR–Mass spectrum of compound **18**

**Fig. S 13** FT–IR spectrum of compound **19**

**Fig. S 14**  $^1\text{H}$  NMR spectrum of compound **19**

**Fig S 15**  $^{13}\text{C}$  NMR spectrum of compound **19**

**Fig. S 16** Mass spectrum of compound **19**

**Fig. S 17** FT–IR spectrum of compound **20**

**Fig. S 18**  $^1\text{H}$  NMR spectrum of compound **20**

**Fig. S 19**  $^{13}\text{C}$  NMR spectrum of compound **20**

**Fig. S 20** Mass spectrum of compound **20**

**Fig. S 21** FT–IR spectrum of compound **21**

**Fig. S 22**  $^1\text{H}$  NMR spectrum of compound **21**

**Fig. S 23**  $^{13}\text{C}$  NMR spectrum of compound **21**

**Fig. S 24** Mass spectrum of compound **21**

**Fig. S 25** FT–IR spectrum of compound **22**

**Fig. S 26**  $^1\text{H}$  NMR spectrum of compound **22**

**Fig. S 27**  $^{13}\text{C}$  NMR spectrum of compound **22**

**Fig. S 28** Mass spectrum of compound **22**

**Fig. S 29** FT-IR spectrum of compound **23**

**Fig. S 30**  $^1\text{H}$  NMR spectrum of compound **23**

**Fig. S 31**  $^{13}\text{C}$  NMR spectrum of compound **23**

**Fig. S 32** Mass spectrum of compound **23**

**Fig. S 33** FT-IR spectrum of compound **24**

**Fig. S 34**  $^1\text{H}$  NMR spectrum of compound **24**

**Fig. S 35**  $^{13}\text{C}$  NMR spectrum of compound **24**

**Fig. S 36** Mass spectrum of compound **24**

**Fig. S 37** 2D view of docking interactions of compounds **17-24** with MDM2 protein, PDB ID: 4ODE.

### **Table Captions**

**Table S 1** Pictorial representation of HOMO and LUMO of compounds **17** and **25**.

**Table S 2** Cartesian Coordinates of Compound **17** for B3LYP/6-31G\*\* calculation

**Table S 3** Cartesian Coordinates of Compound **25** for B3LYP/6-31G\*\* calculation

**Table S 4** Cartesian Coordinates of Compound **17** for B3LYP/6-311G\*\* calculation

**Table S 5** Cartesian Coordinates of Compound **25** for B3LYP/6-311G\*\* calculation

**Table S 6** Cartesian Coordinates of Compound **17** for M06/6-31G\*\* calculation

**Table S 7** Cartesian Coordinates of Compound **25** for M06/6-31G\*\* calculation

**Table S 8** Cartesian Coordinates of Compound **17** for M06/6-311G\*\* calculation

**Table S 9** Cartesian Coordinates of Compound **25** for M06/6-311G\*\* calculation

**Table S 10** Cartesian Coordinates of Compound **17** for M06/6-311G-3DF-3PD calculation

**Table S 11** Cartesian Coordinates of Compound **25** for M06/6-311G-3DF-3PD calculation

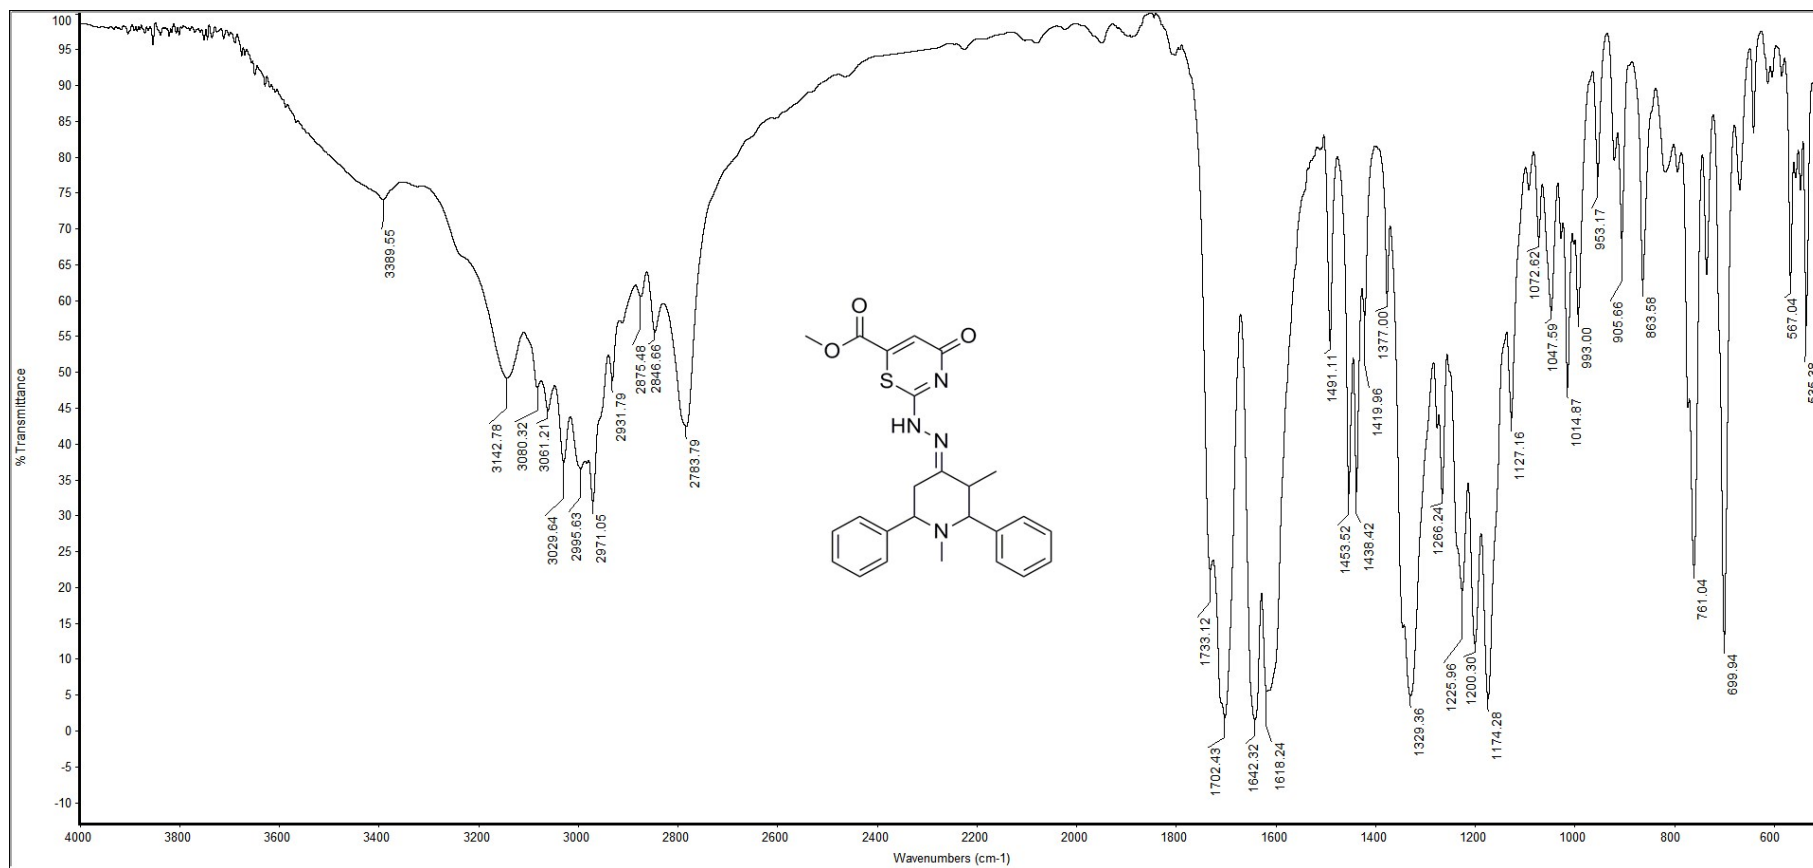

Fig. S 1 FT-IR Spectrum of compound 17

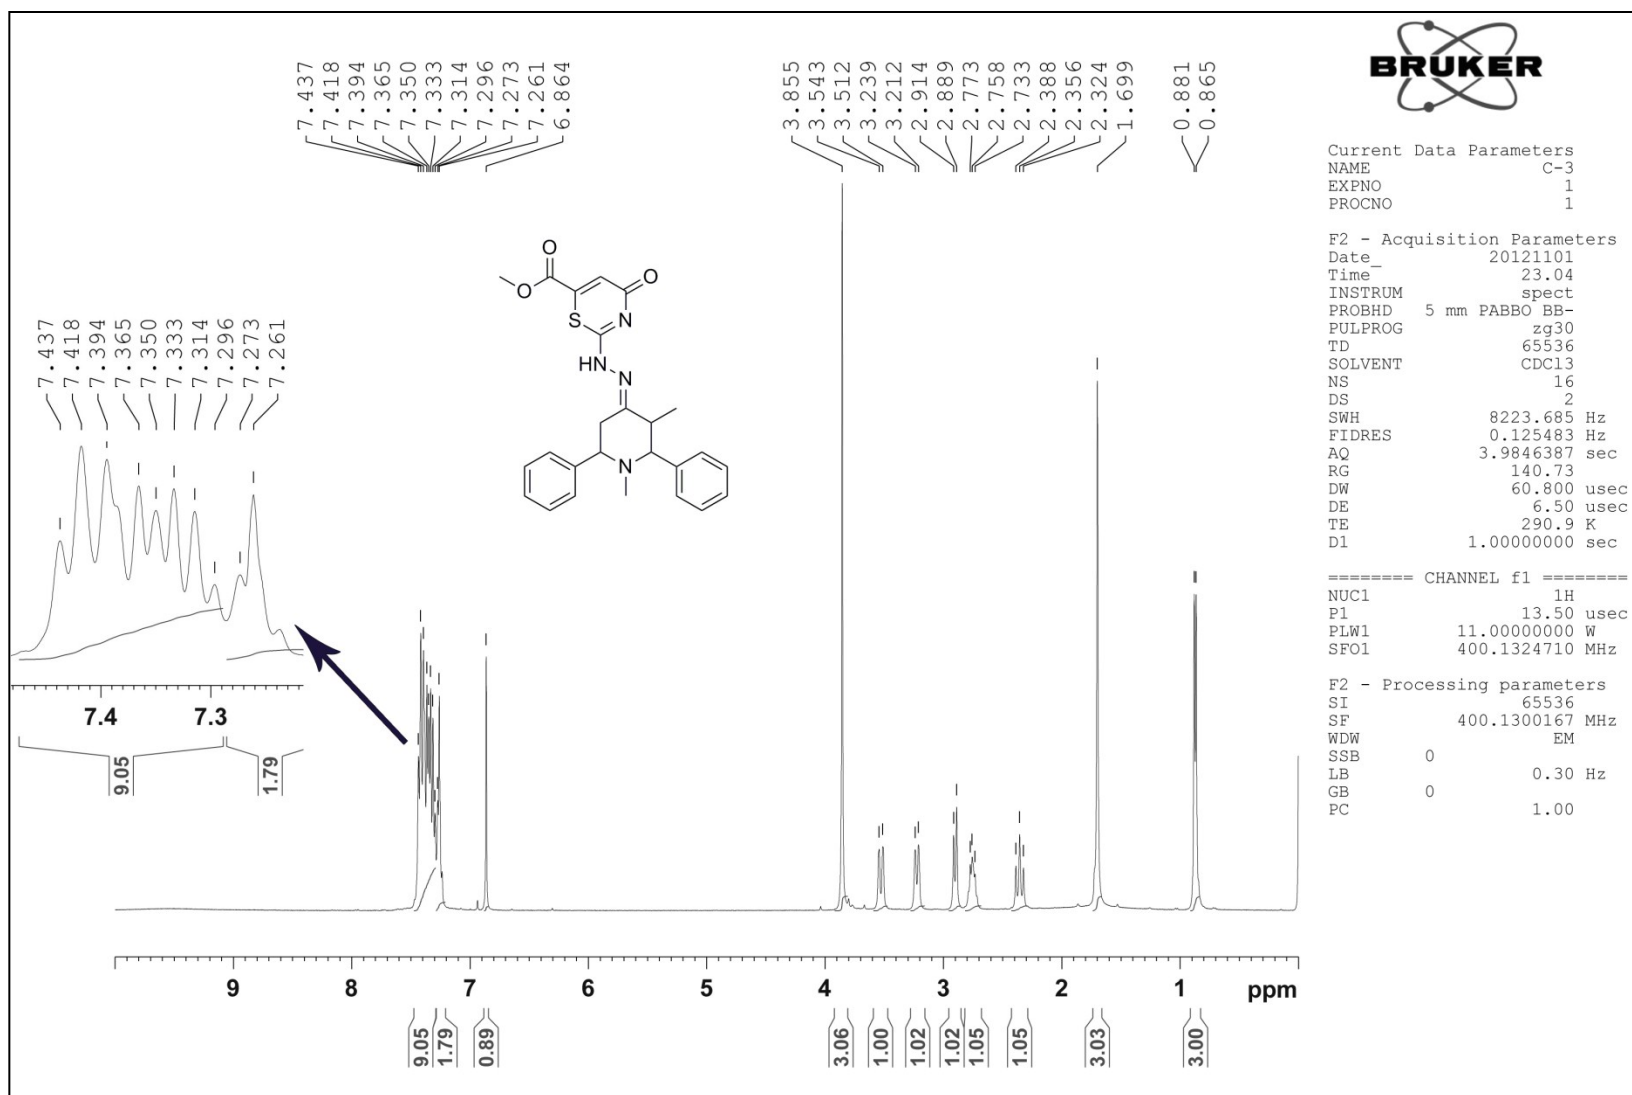

Fig. S 2 <sup>1</sup>H NMR Spectrum of Compound 17

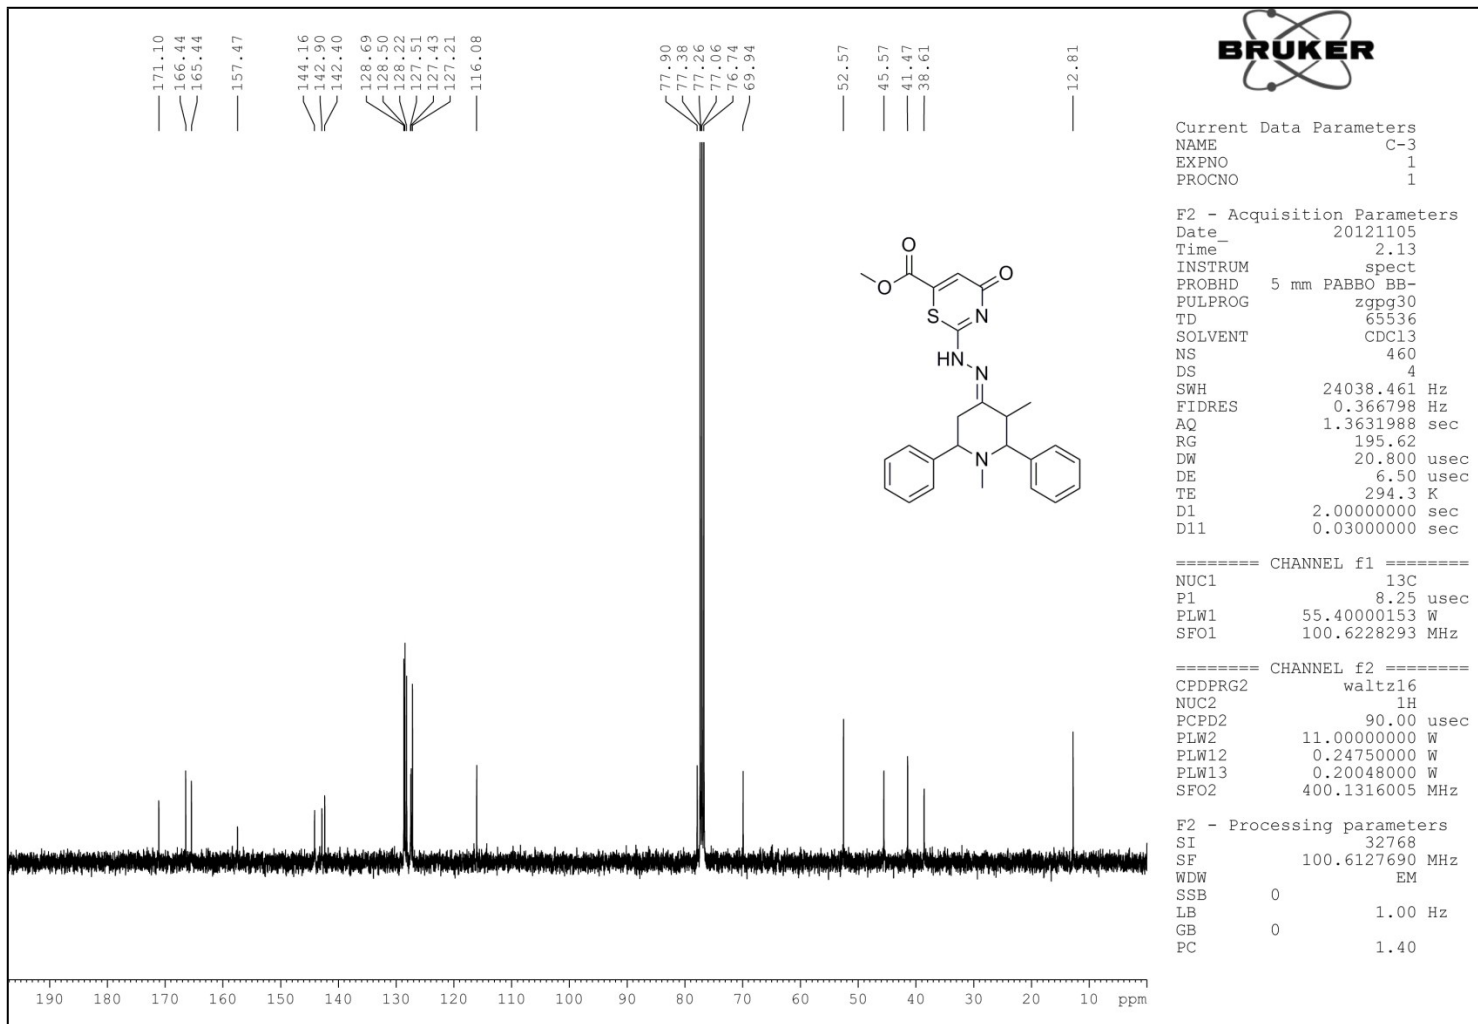

Fig. S 3 <sup>13</sup>C NMR spectrum of compound 17

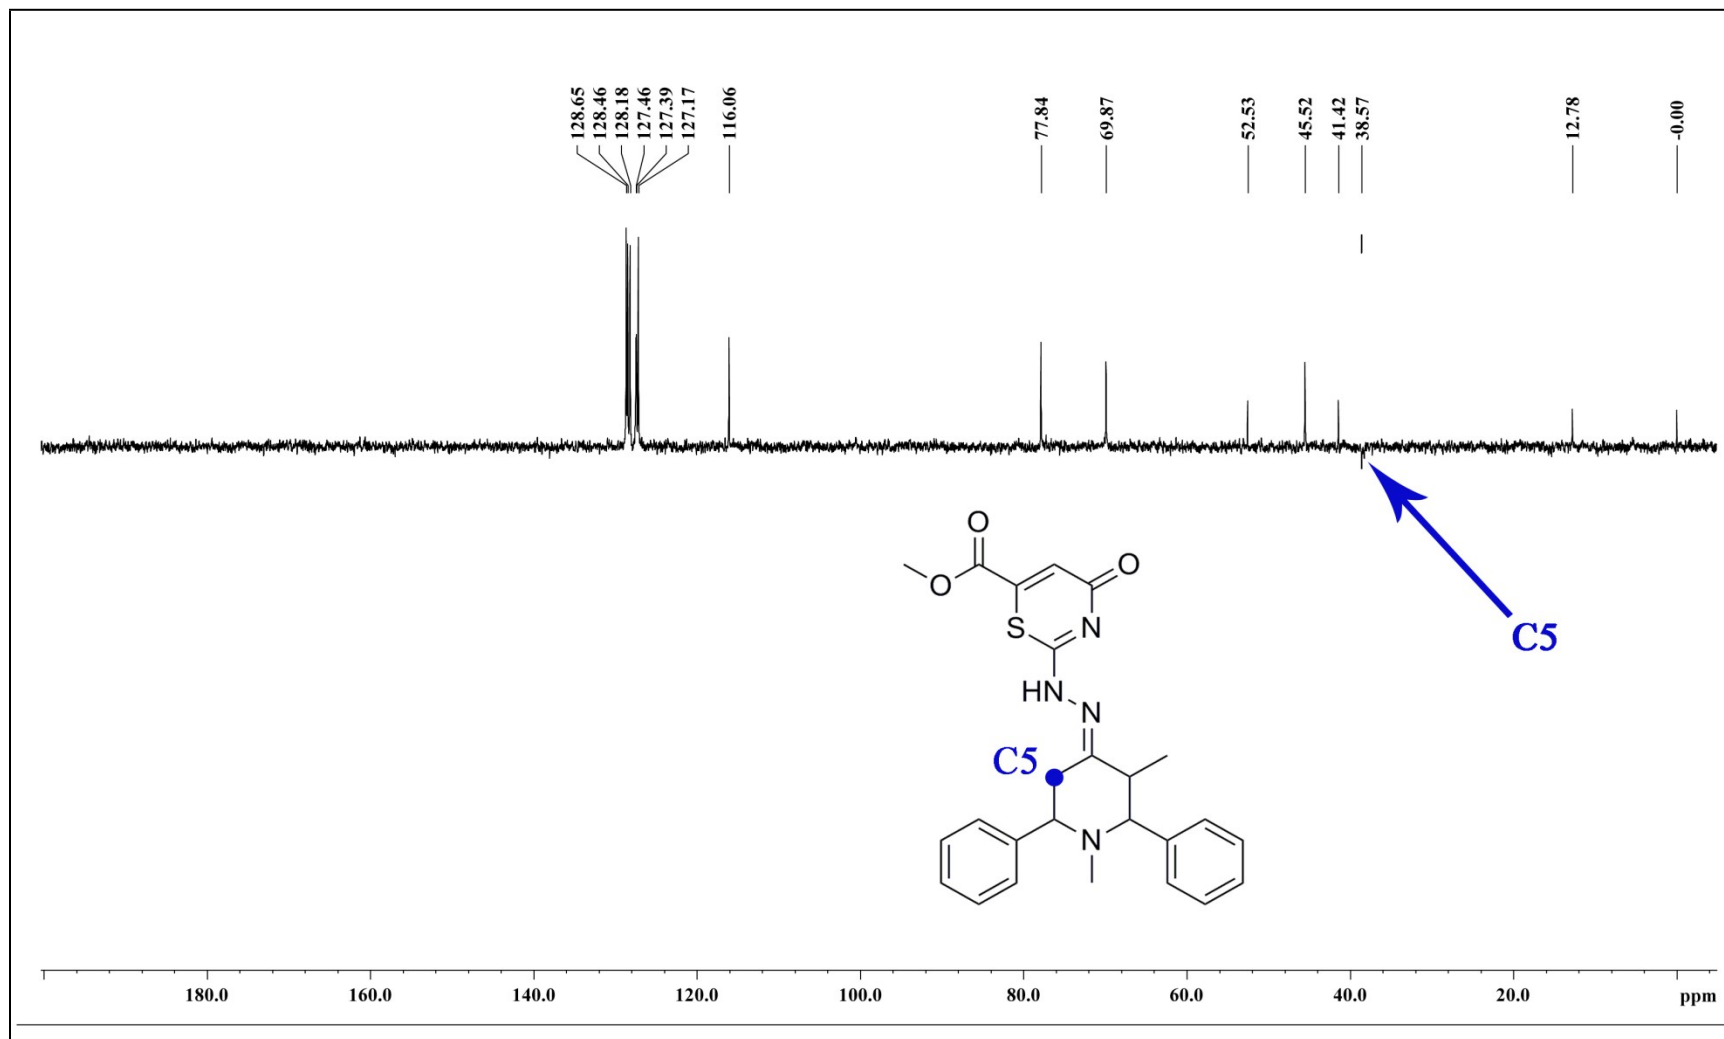

Fig. S 4 DEPT spectrum of compound 17



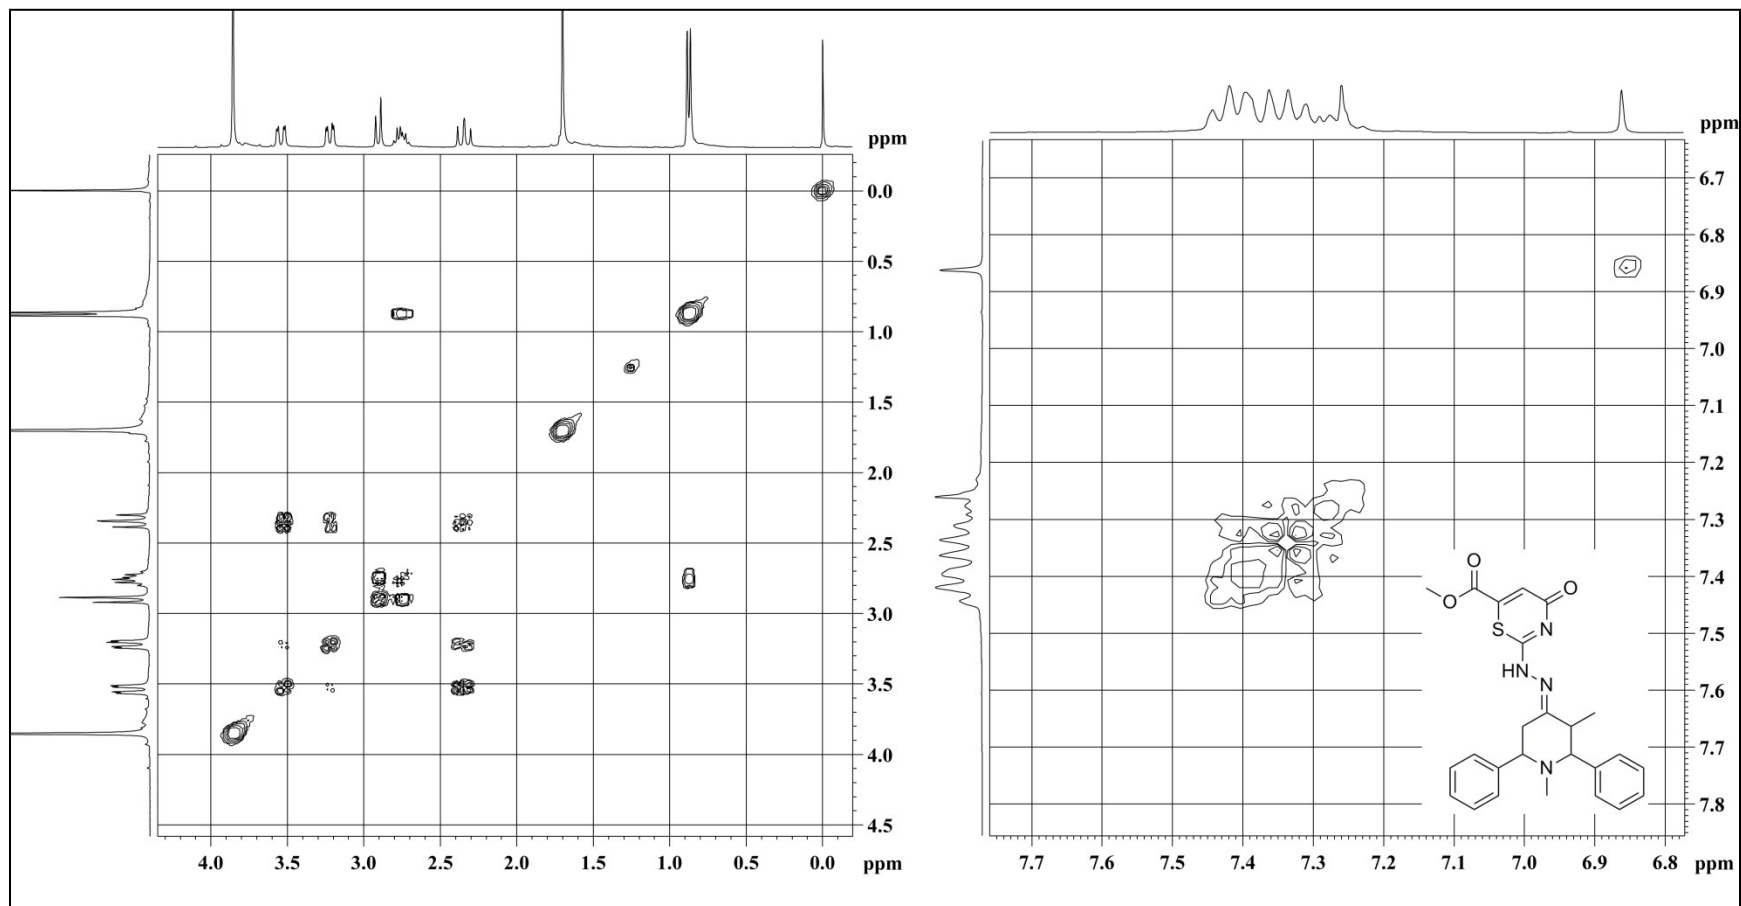

Fig. S 5  $^1\text{H}$ - $^1\text{H}$  COSY NMR spectrum of compound 17

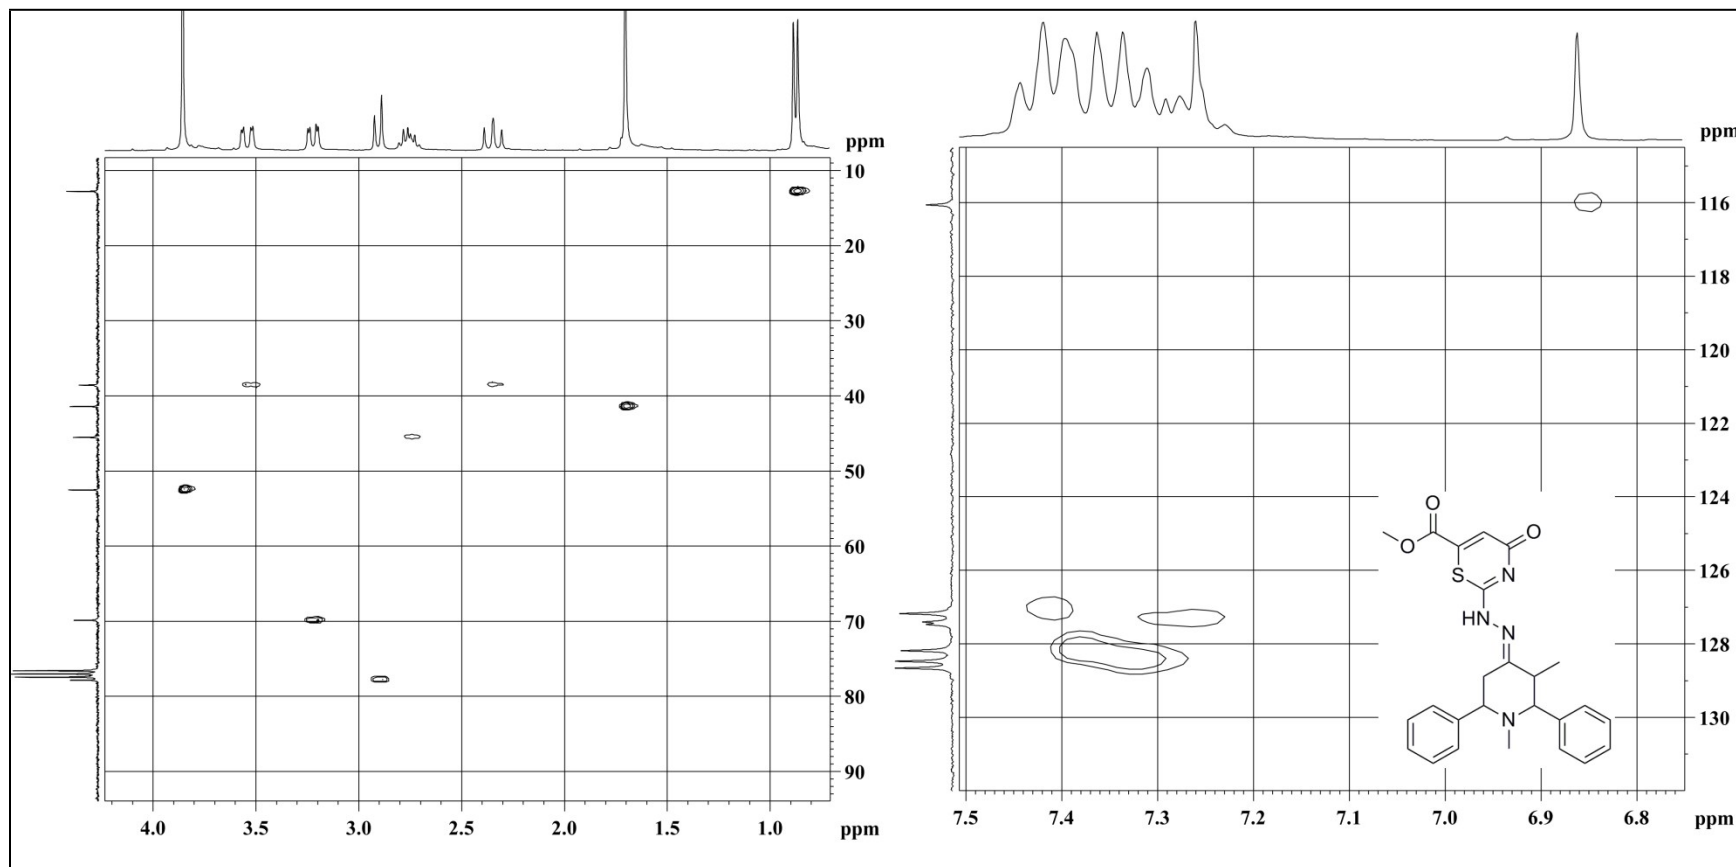

**Fig. S 6**  $^1\text{H}$ - $^{13}\text{C}$  COSY NMR spectrum of compound **17**

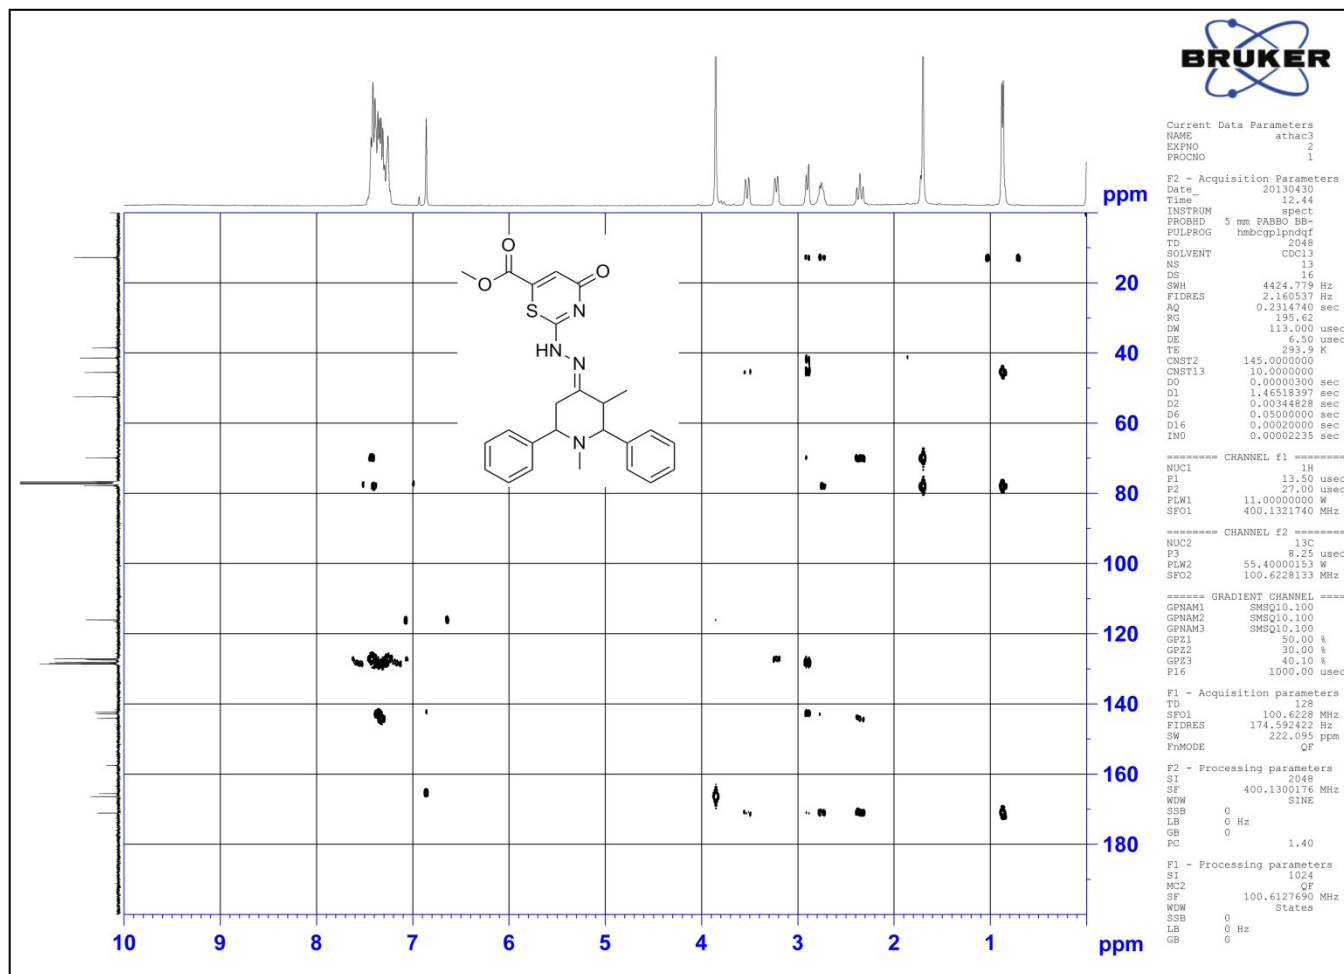

Fig. S 7 HMBC spectrum of compound 17

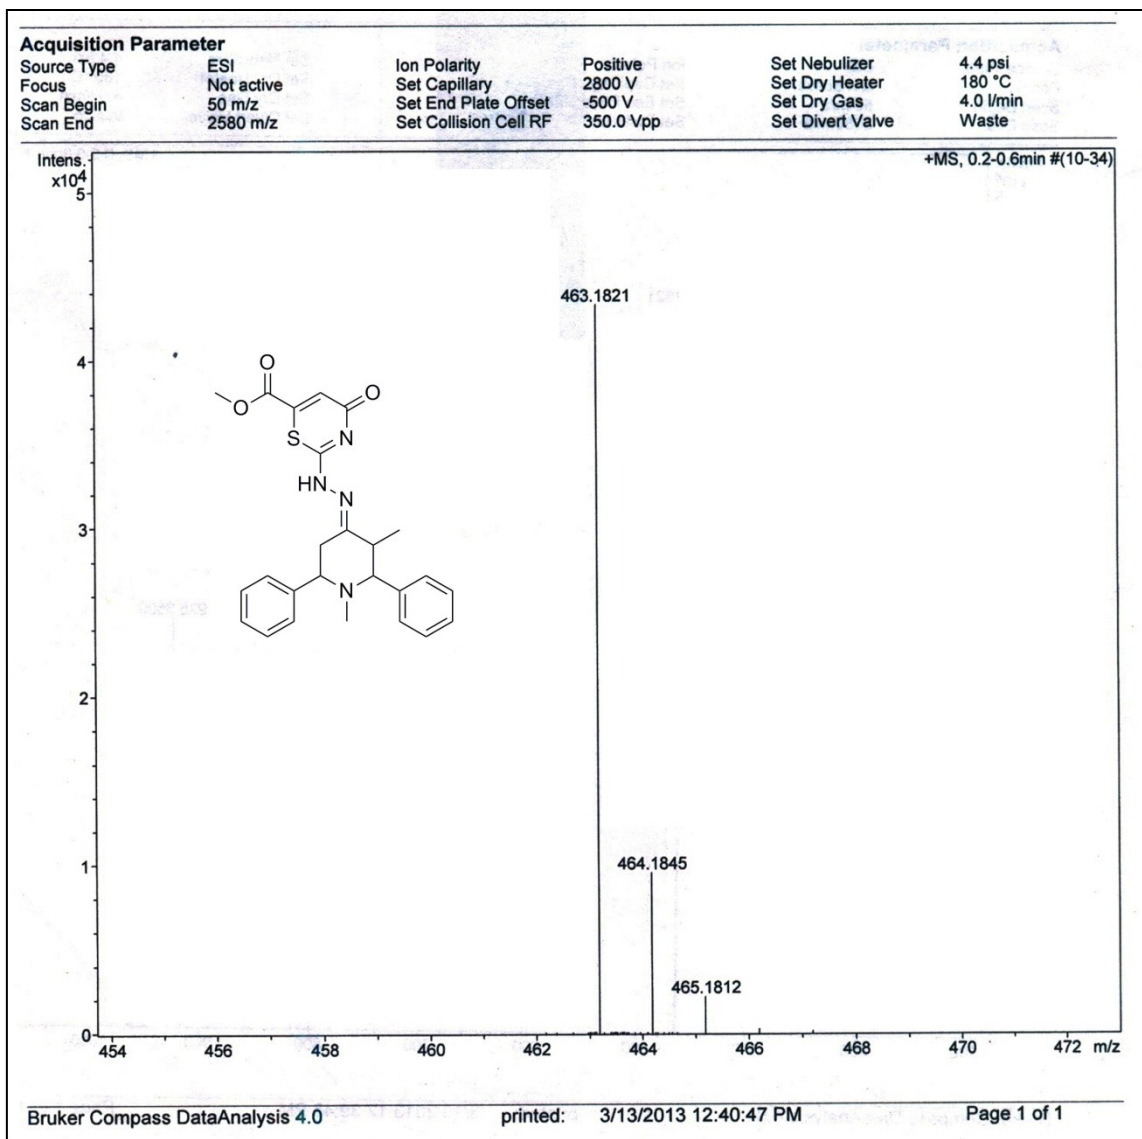

Fig. S 8 HR–Mass spectrum of compound 17

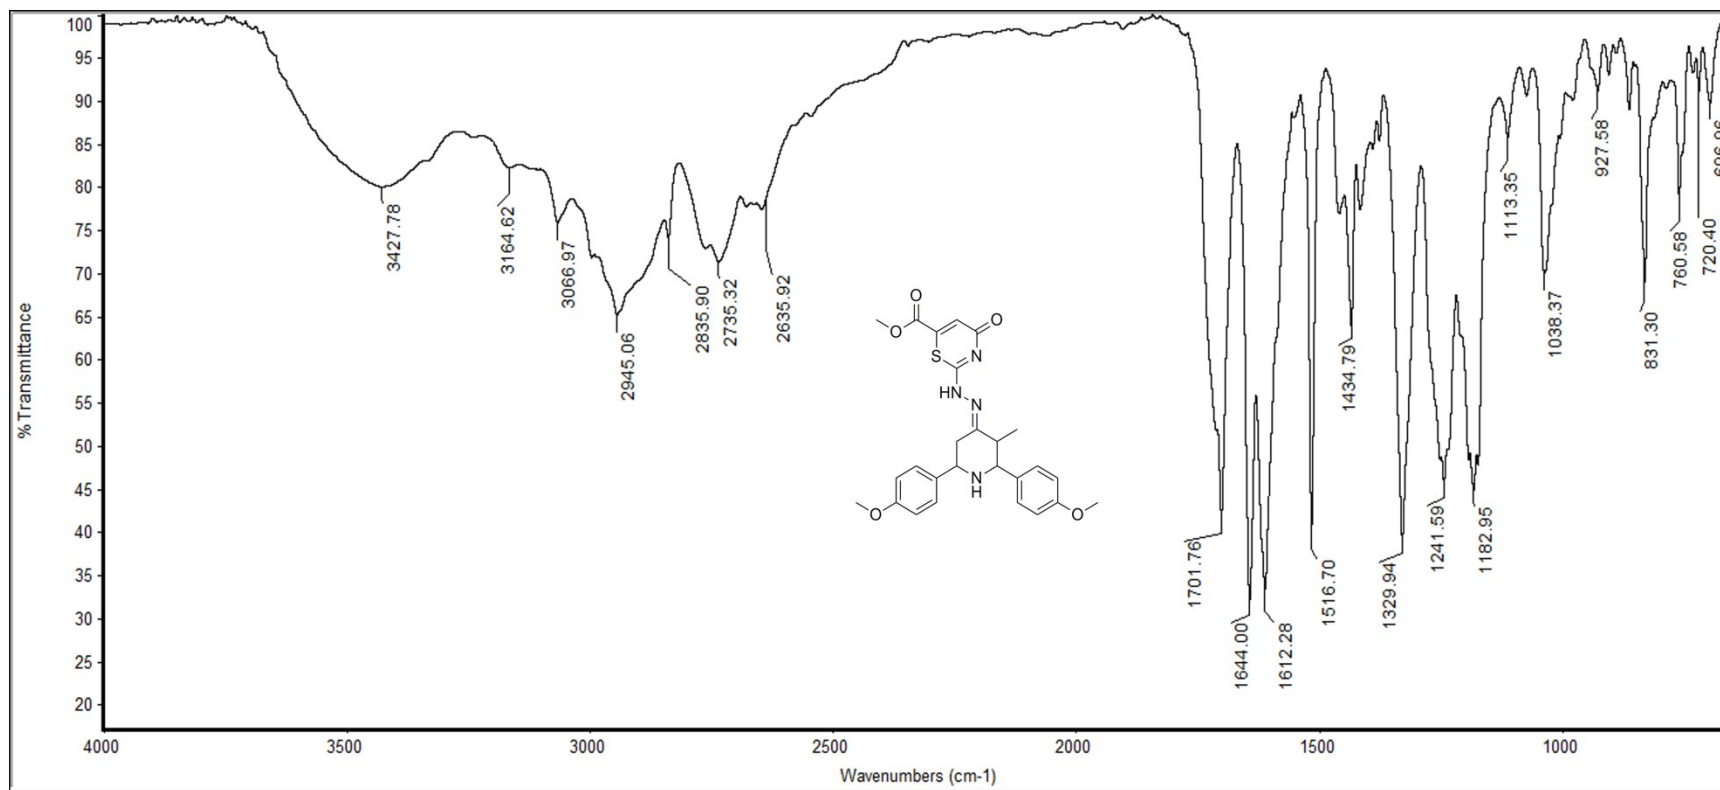

**Fig. S 9** FT-IR spectrum of compound **18**

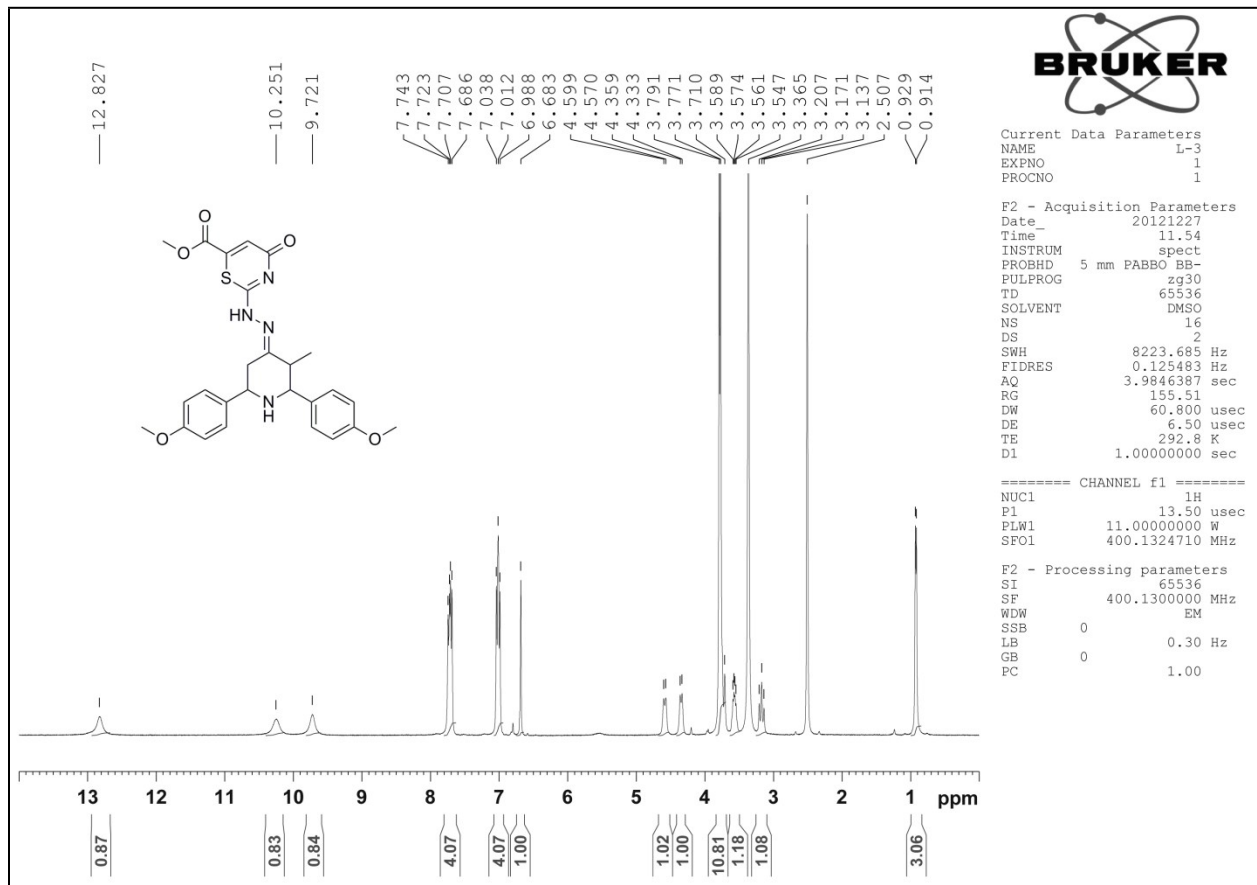

**Fig. S 10**  $^1\text{H}$  NMR Spectrum of Compound 18

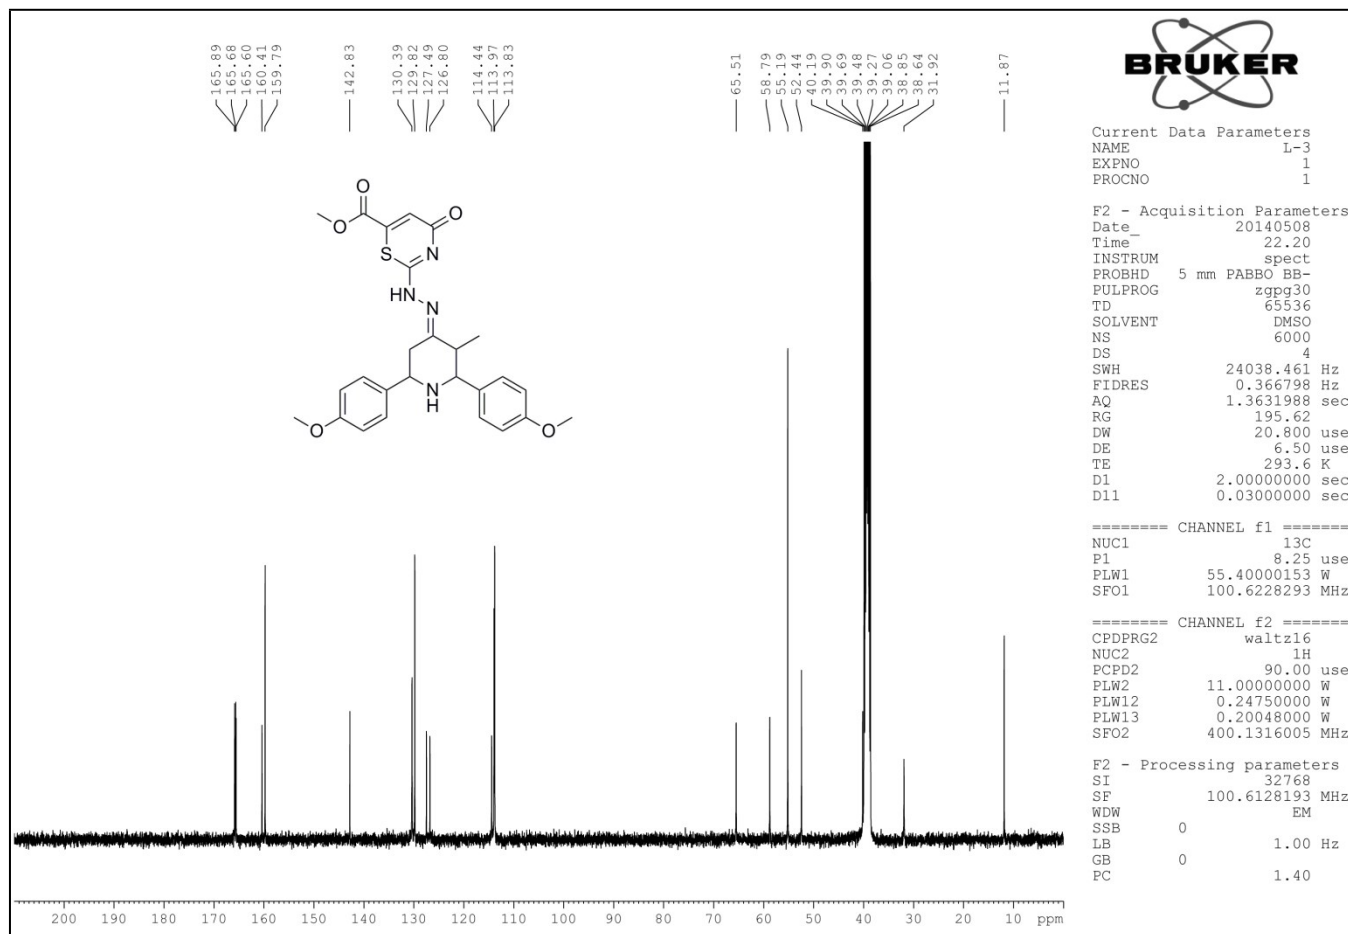

Fig. S 11 <sup>13</sup>C NMR spectrum of compound 18

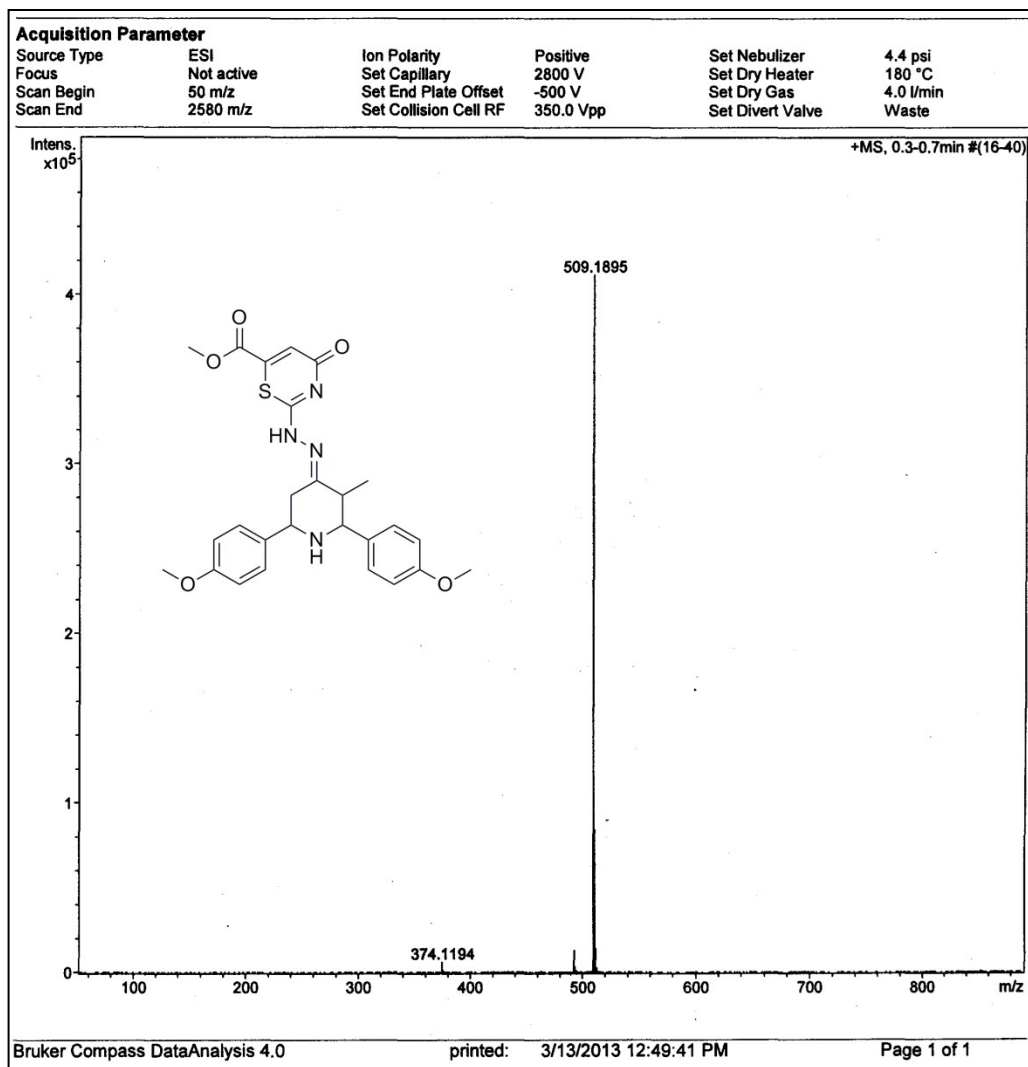

Fig. S 12 HR-Mass spectrum of compound 18



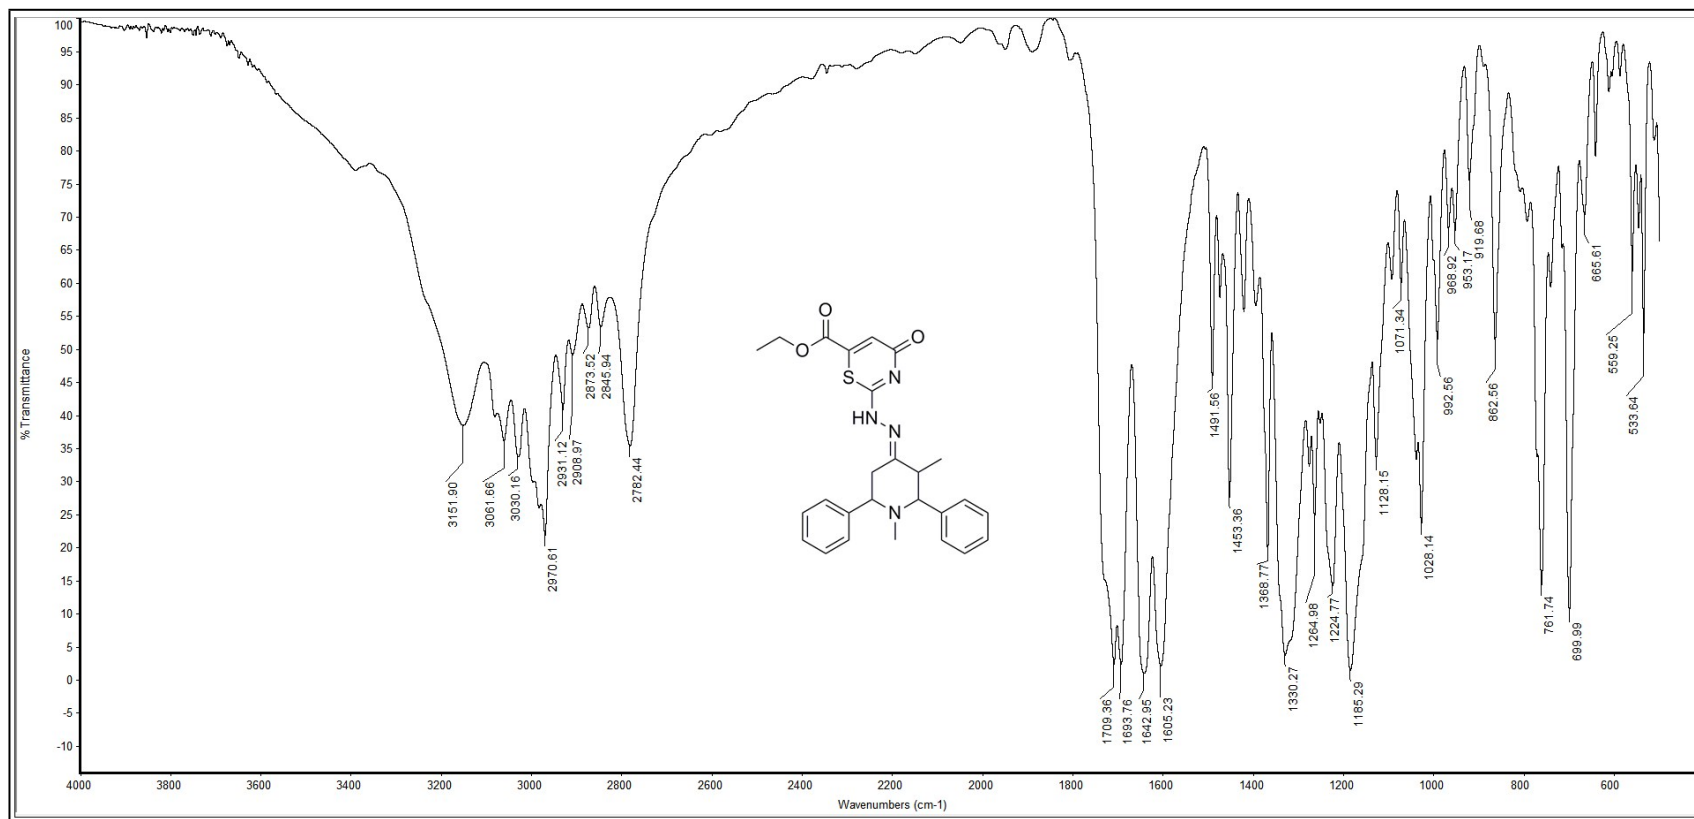

Fig. S 13 FT-IR spectrum of compound 19

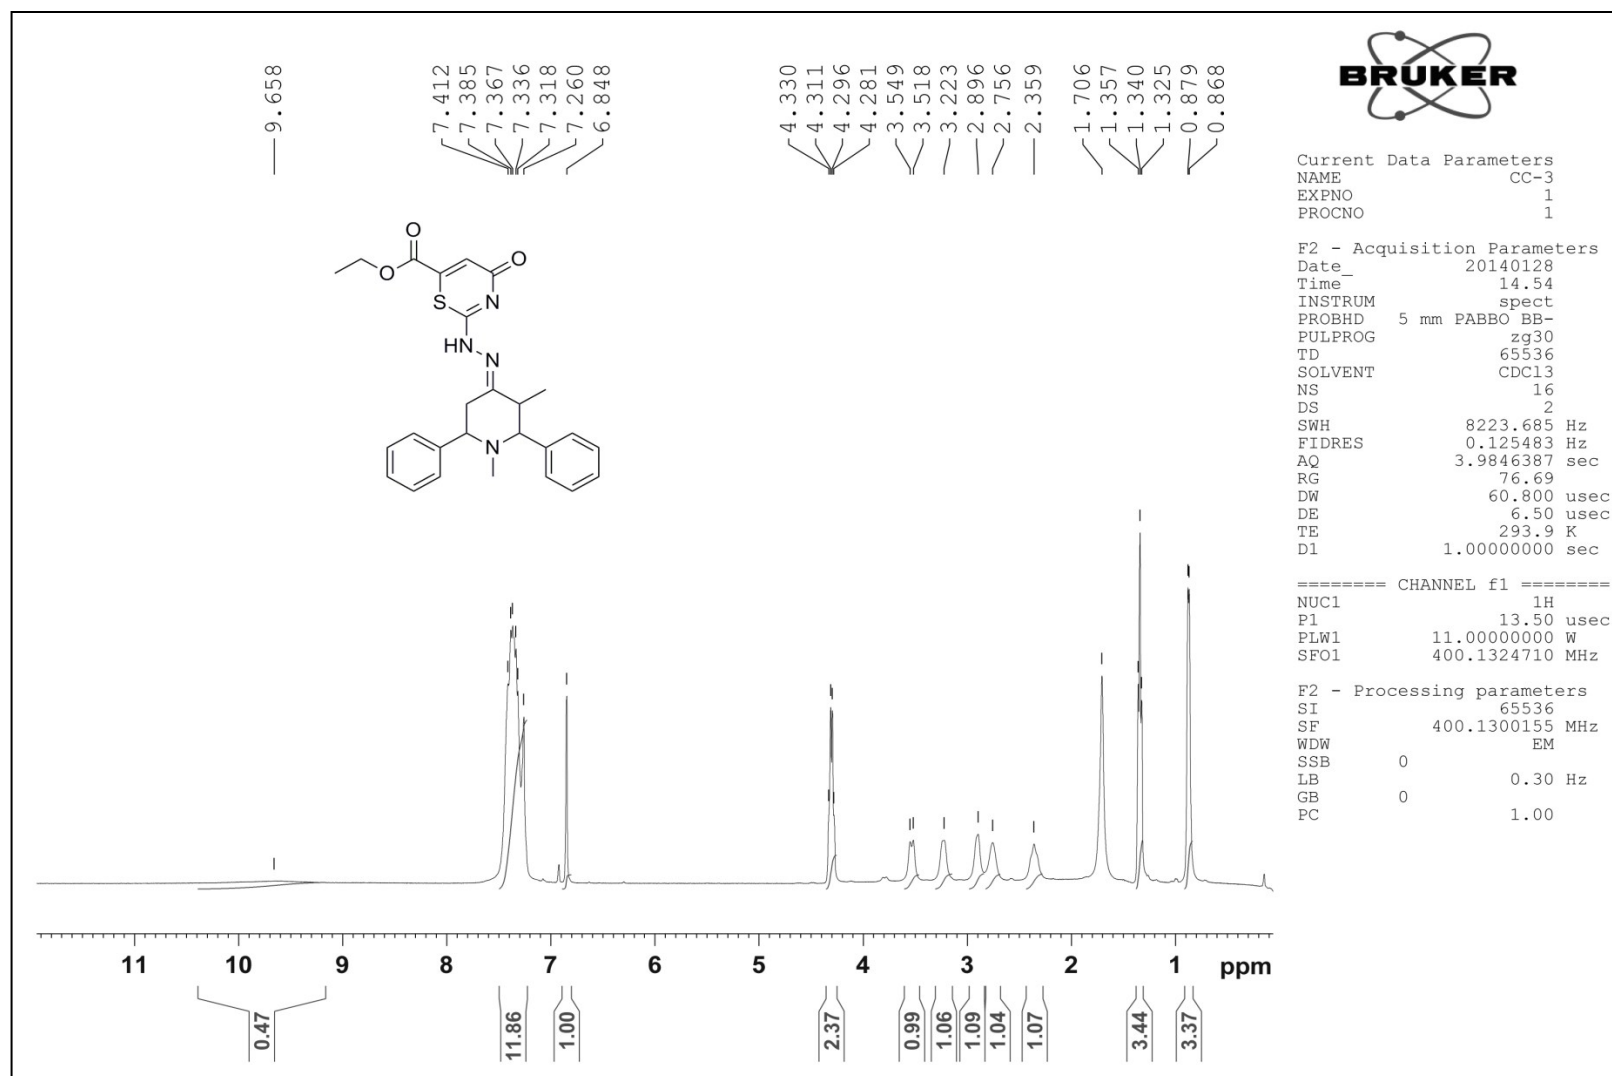

Fig. S 14 <sup>1</sup>H NMR Spectrum of Compound 19

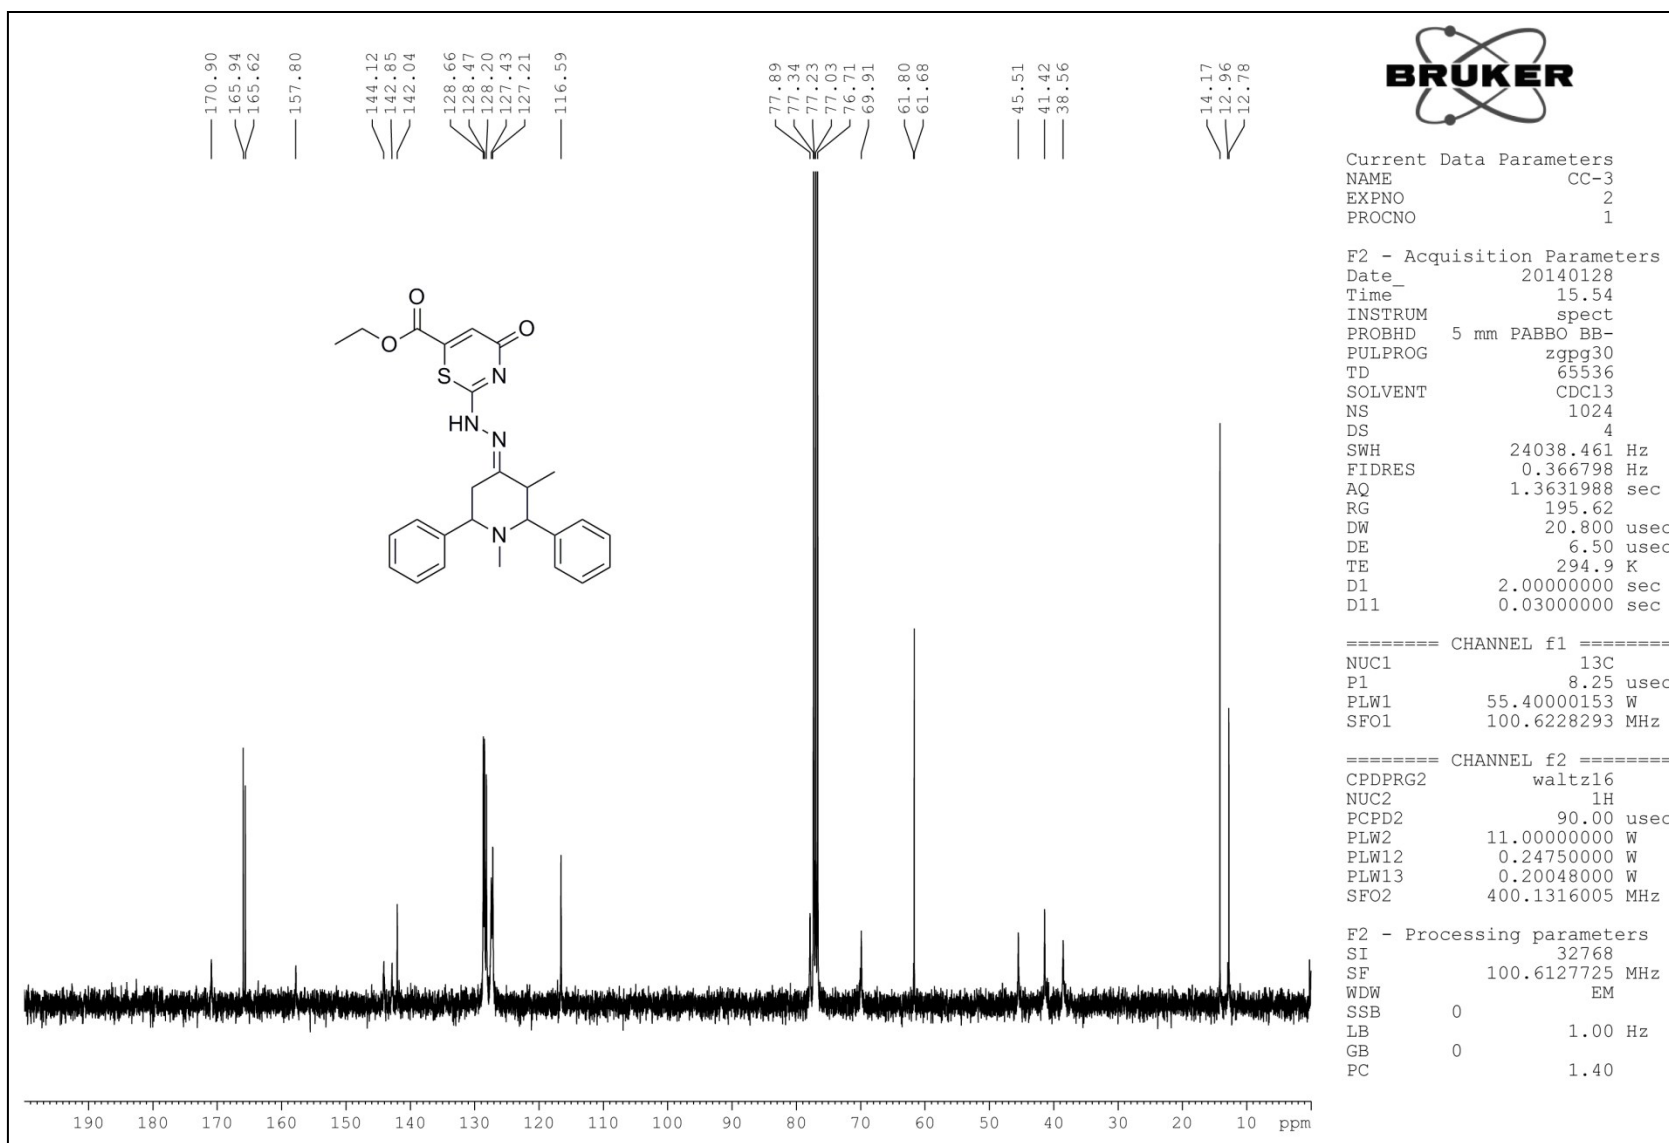

Fig. S 15 <sup>13</sup>C NMR spectrum of compound 19

Scan: #1813507  $\mu$ S: 1 IT: 0.28 NL: 9.80E8  
Type: FTMS + p ESI Full ms [150.00-1500.00]

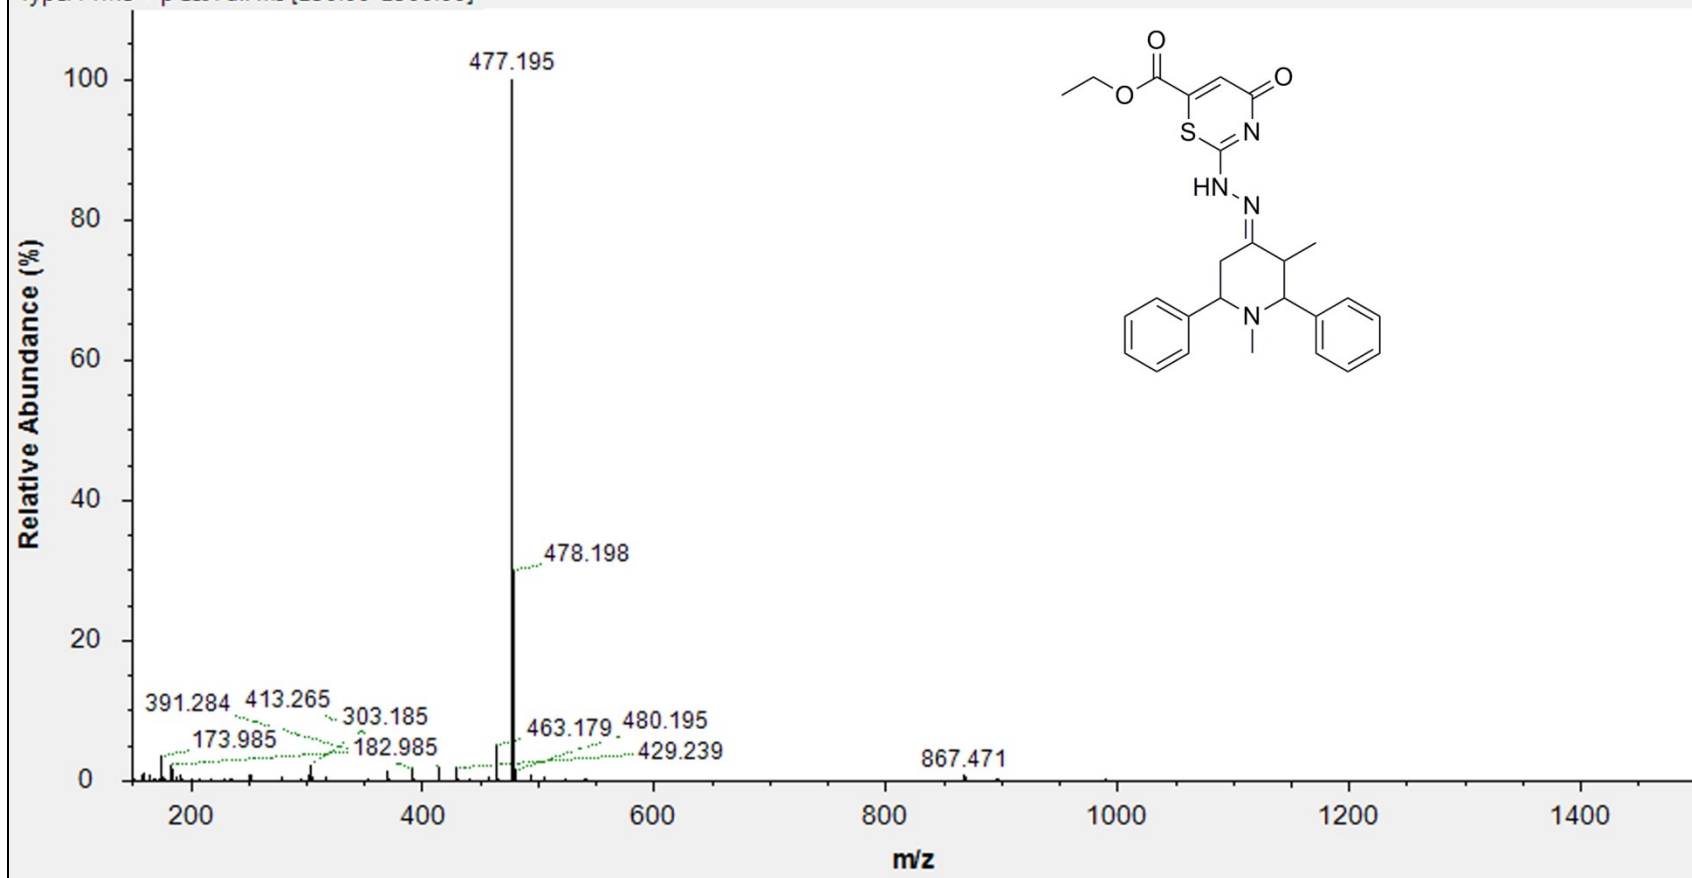

Fig. S 16 Mass spectrum of compound 19

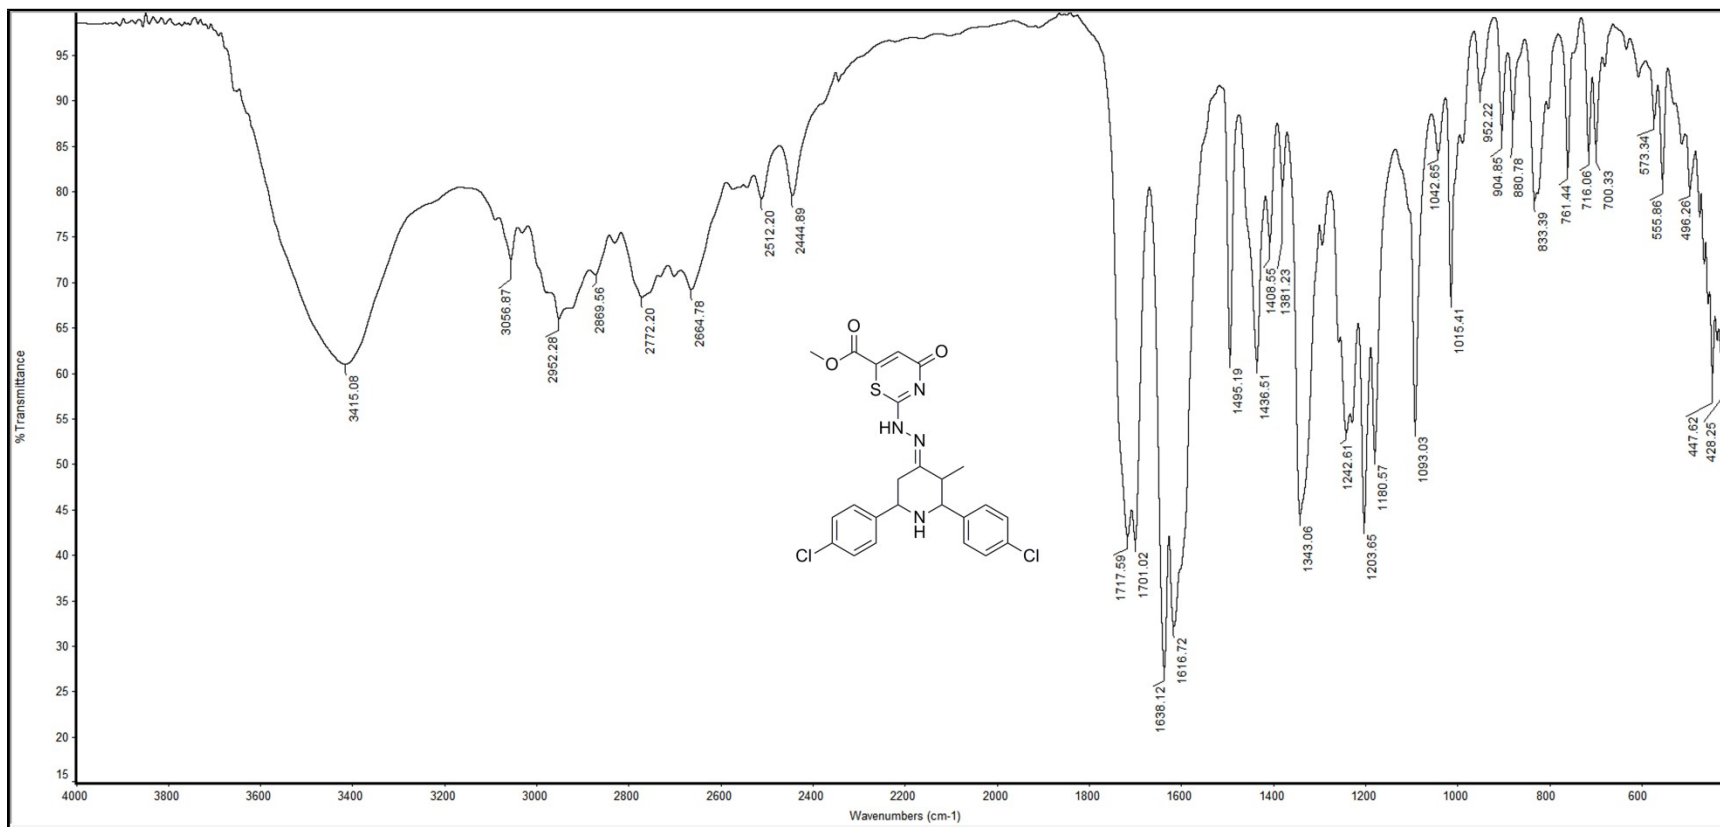

Fig. S 17 FT-IR spectrum of compound 20

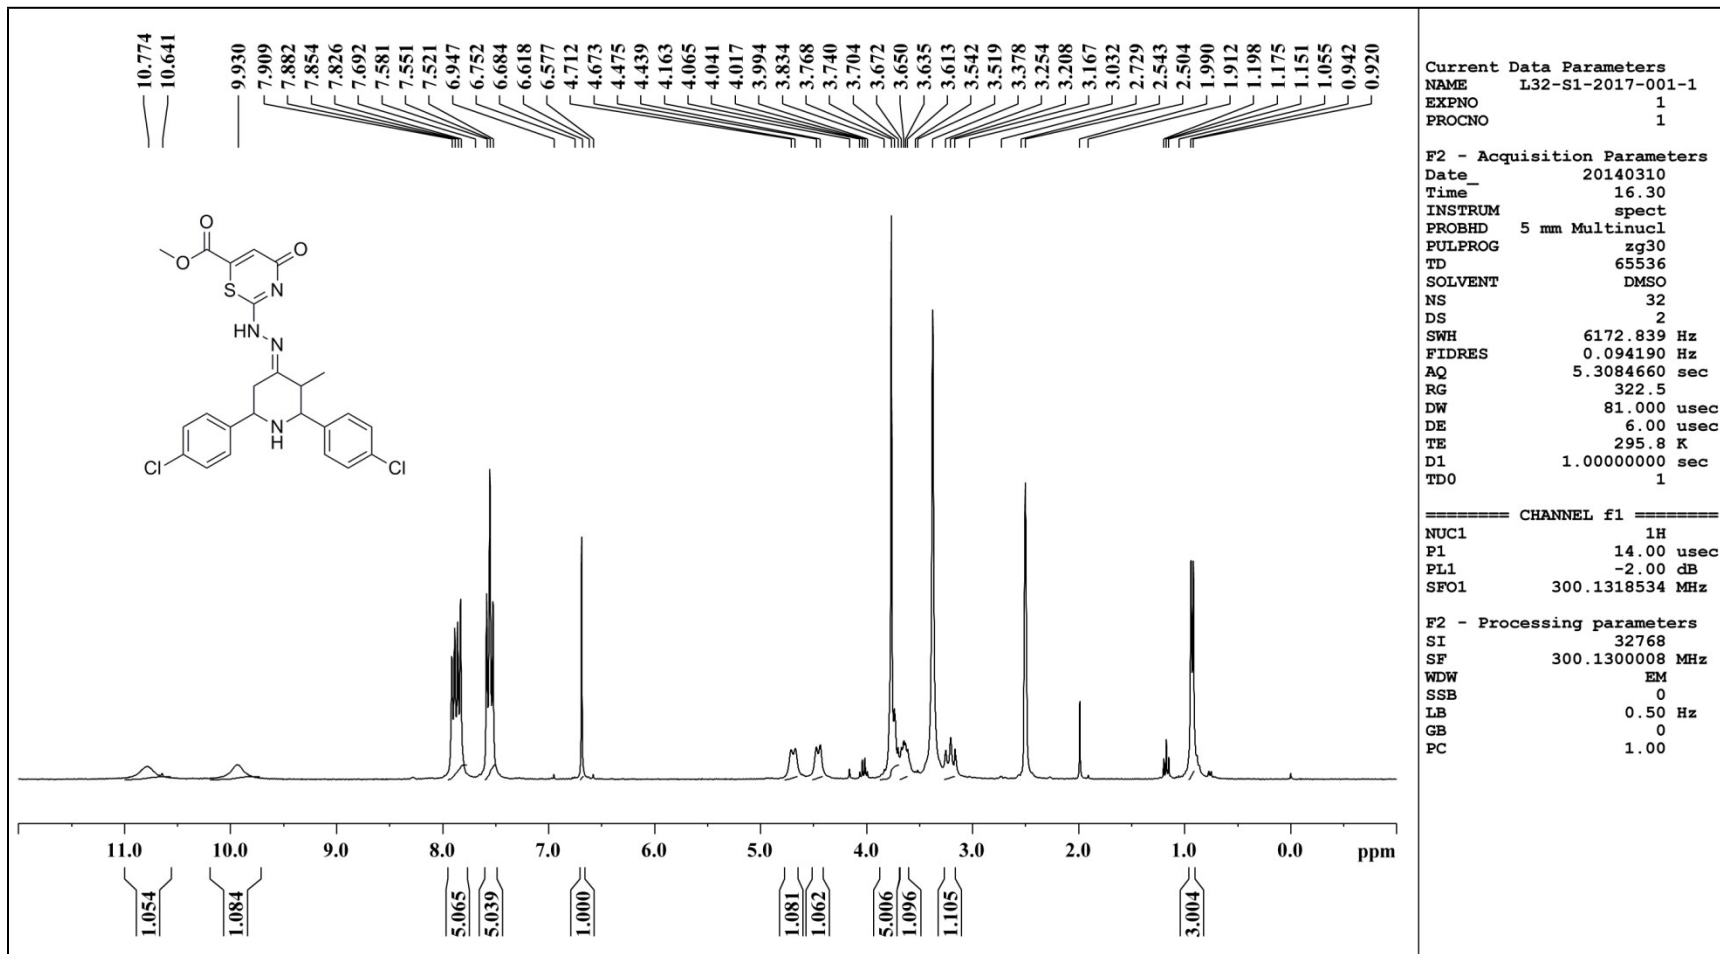

Fig. S 18 <sup>1</sup>H NMR Spectrum of Compound 20

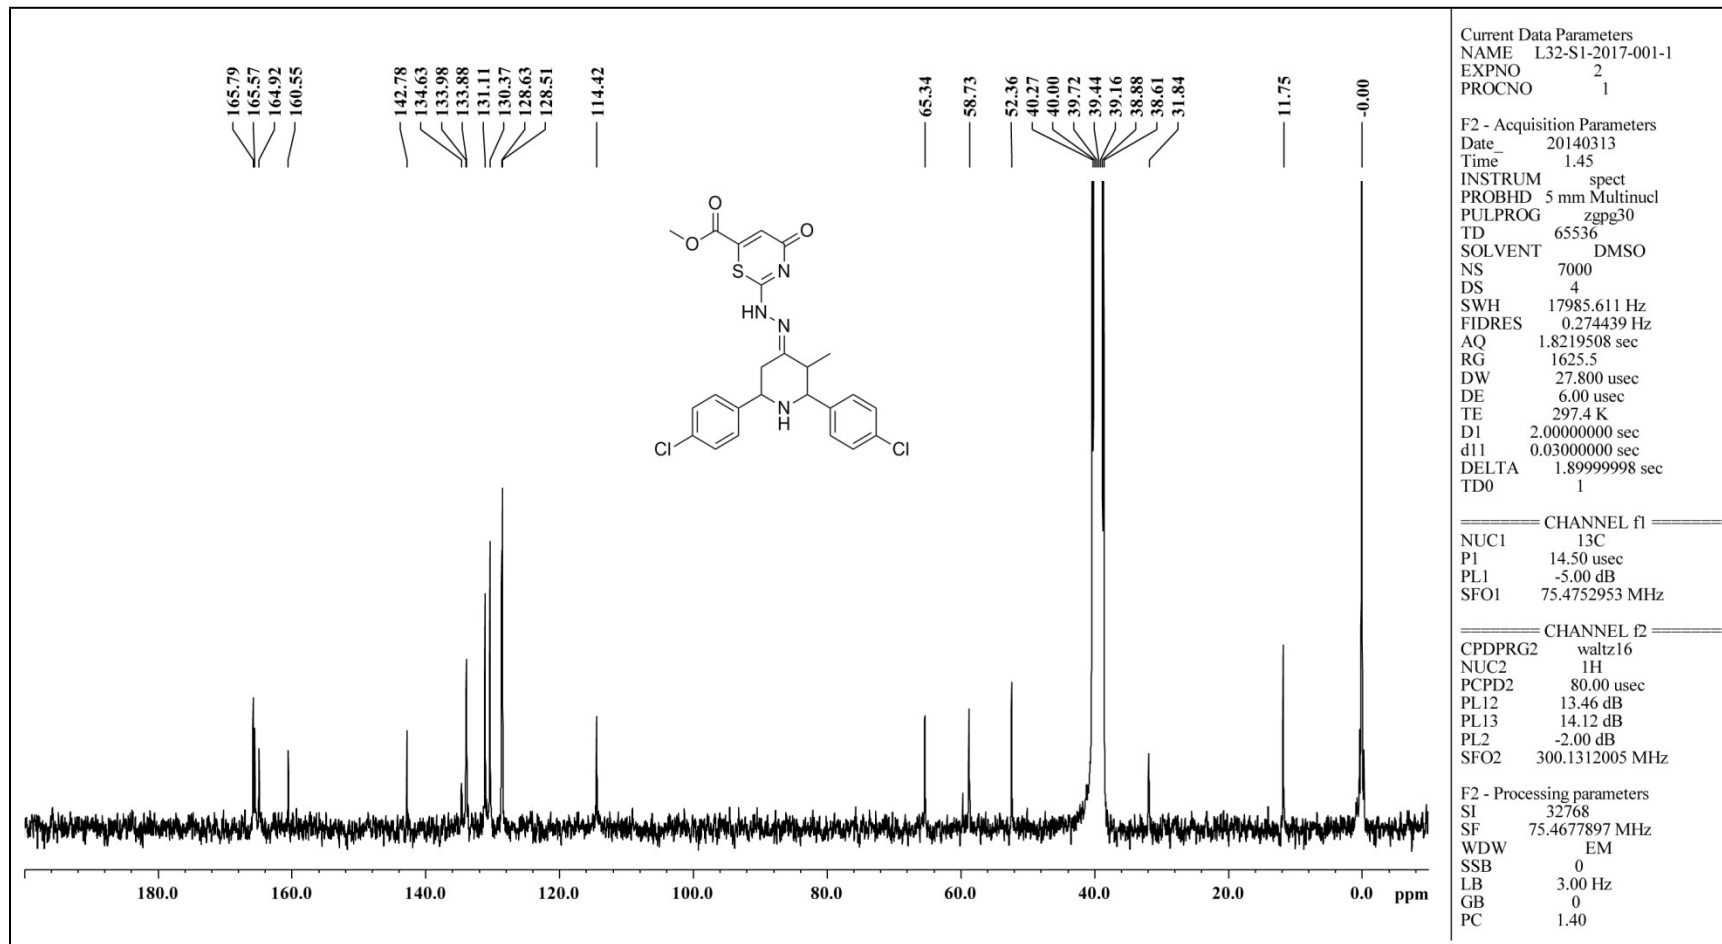

Fig. S 19 <sup>13</sup>C NMR spectrum of compound 20

Scan: #1758698  $\mu$ S: 1 IT: 0.64 NL: 1.35E8  
Type: FTMS + p ESI Full ms [200.00-1500.00]

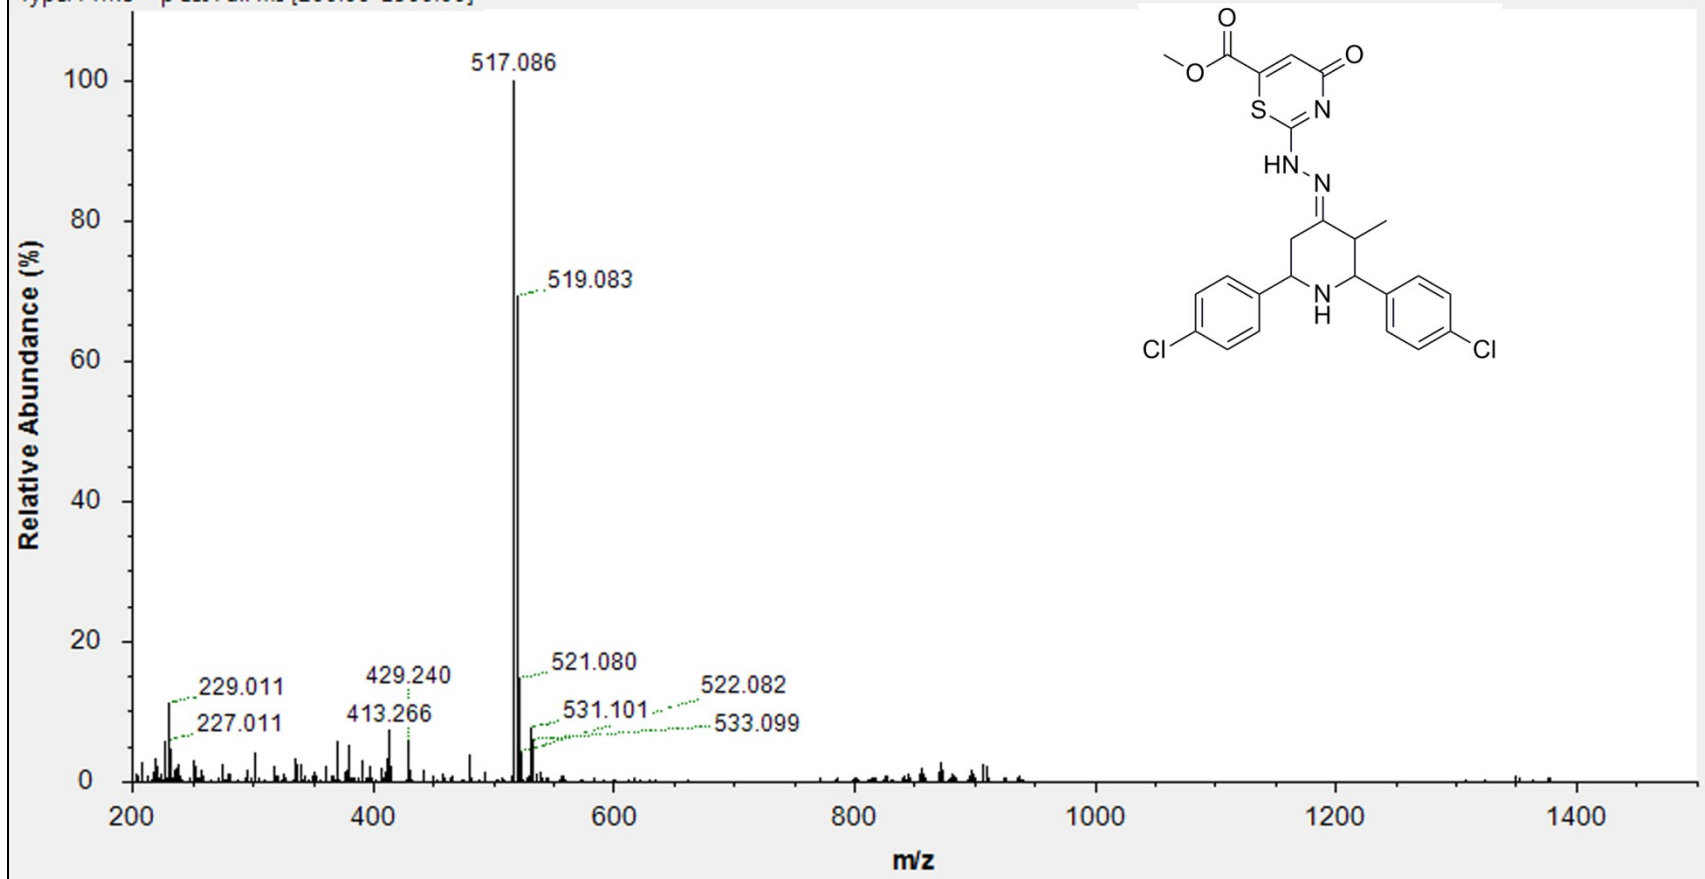

Fig. S 20 Mass spectrum of compound 20



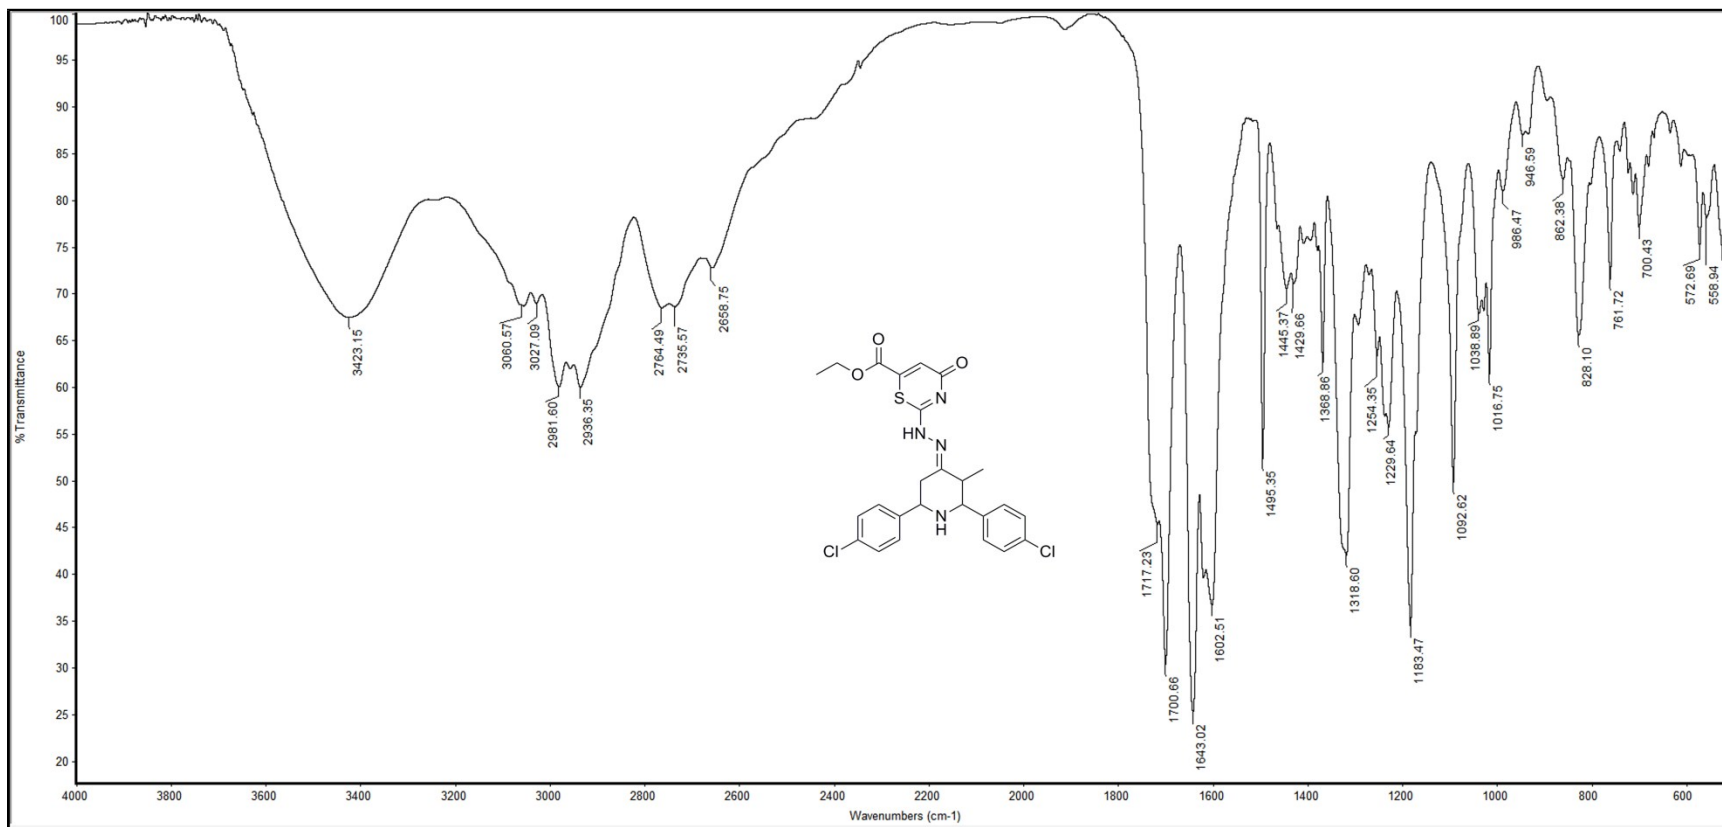

Fig. S 21 FT-IR spectrum of compound 21

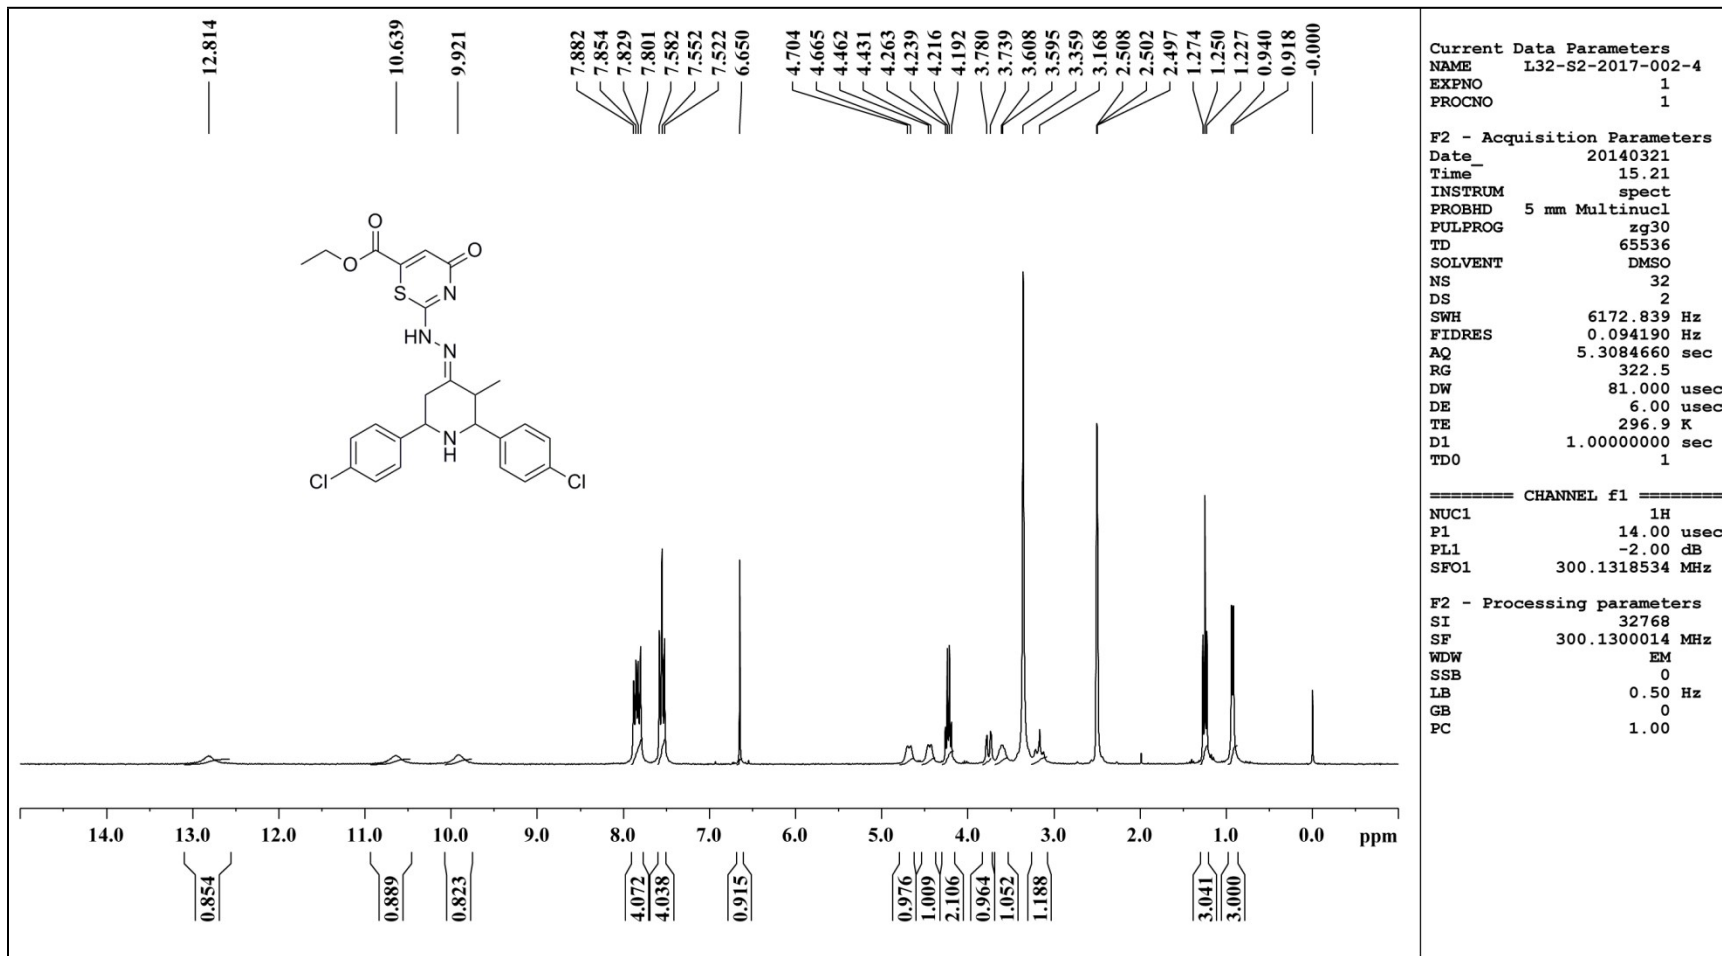

Fig. S 22 <sup>1</sup>H NMR Spectrum of Compound 21

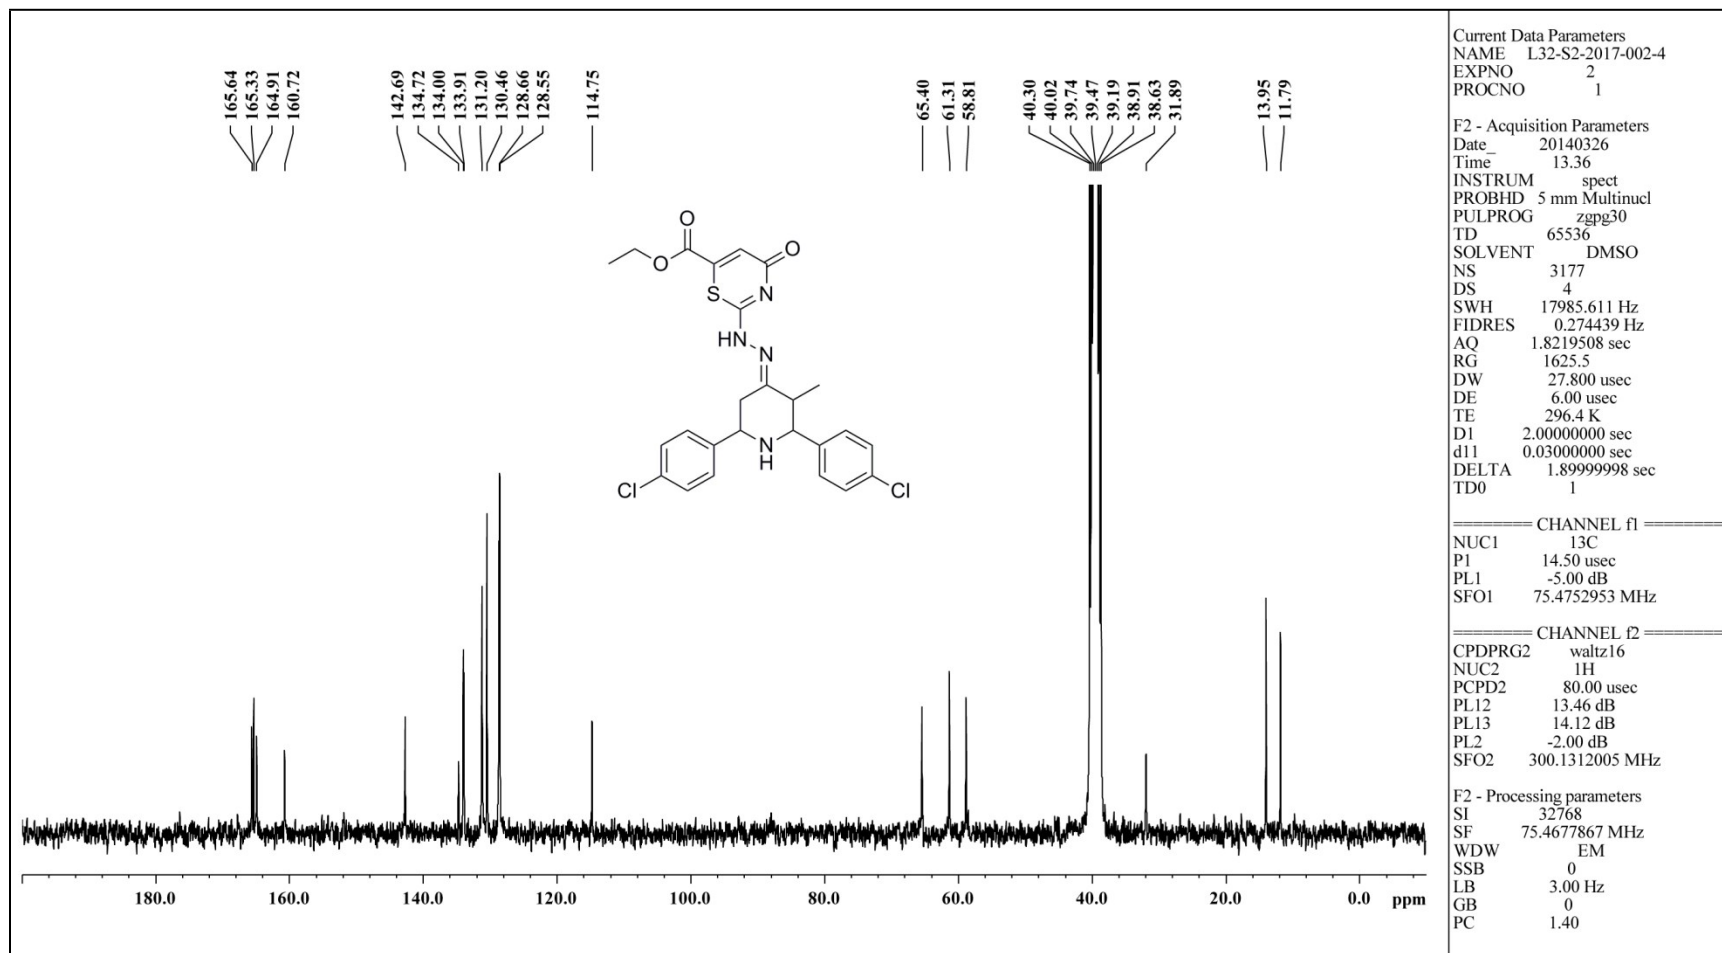

Fig. S 23 <sup>13</sup>C NMR spectrum of compound 21

Scan: #1760868  $\mu$ S: 1 IT: 0.33 NL: 4.35E8  
Type: FTMS + p ESI Full ms [200.00-1500.00]

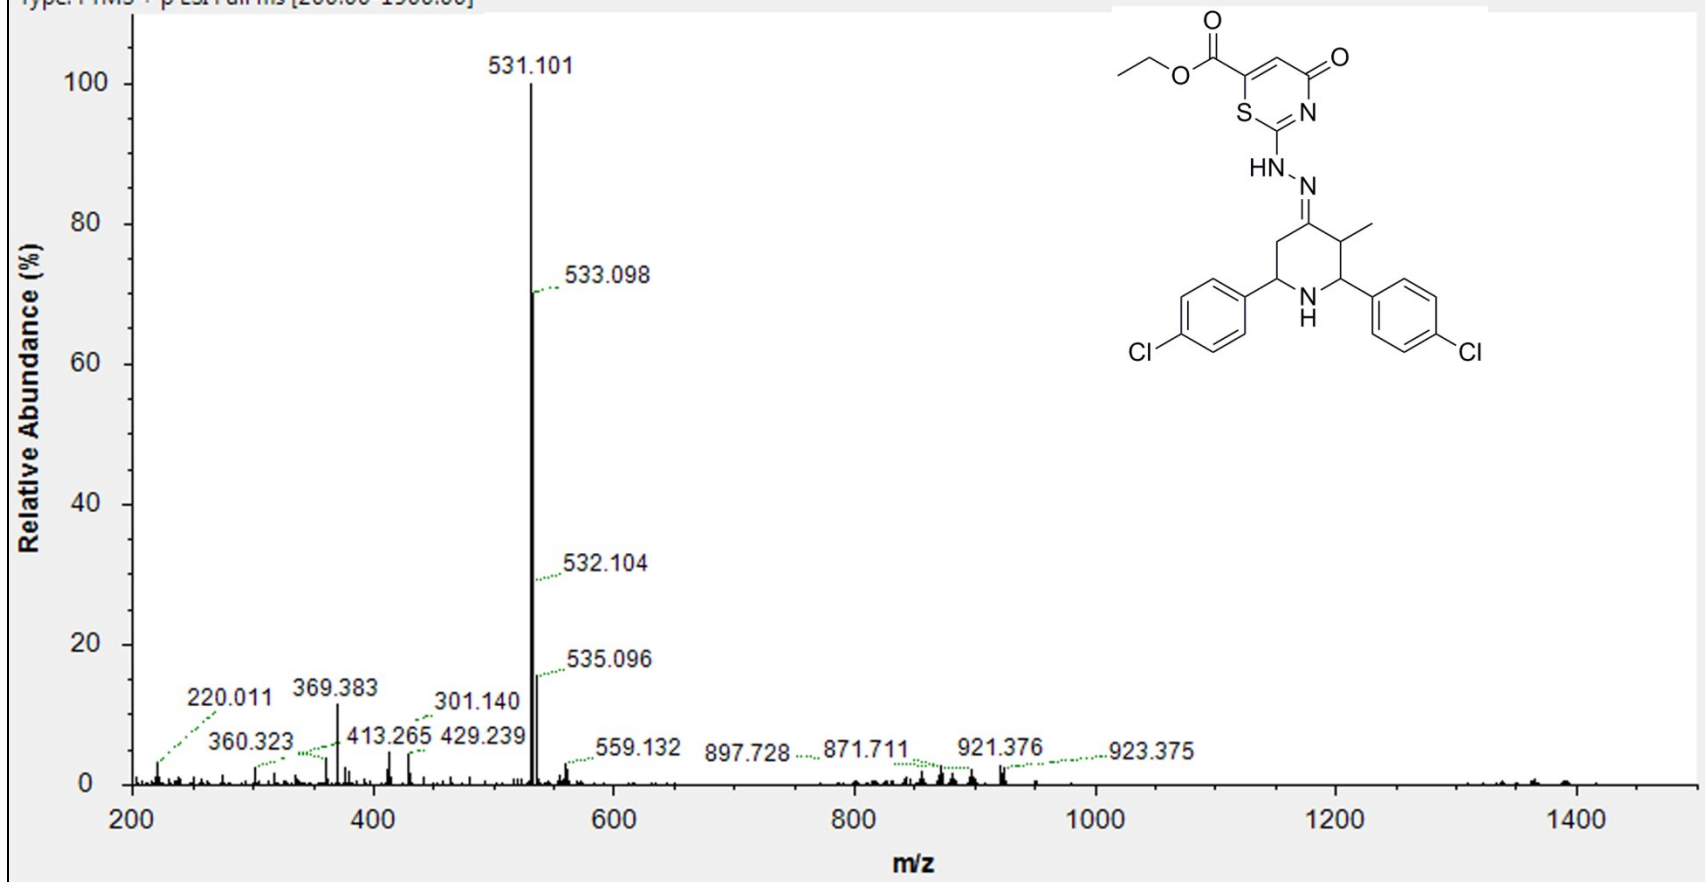

Fig. S 24 Mass spectrum of compound 21

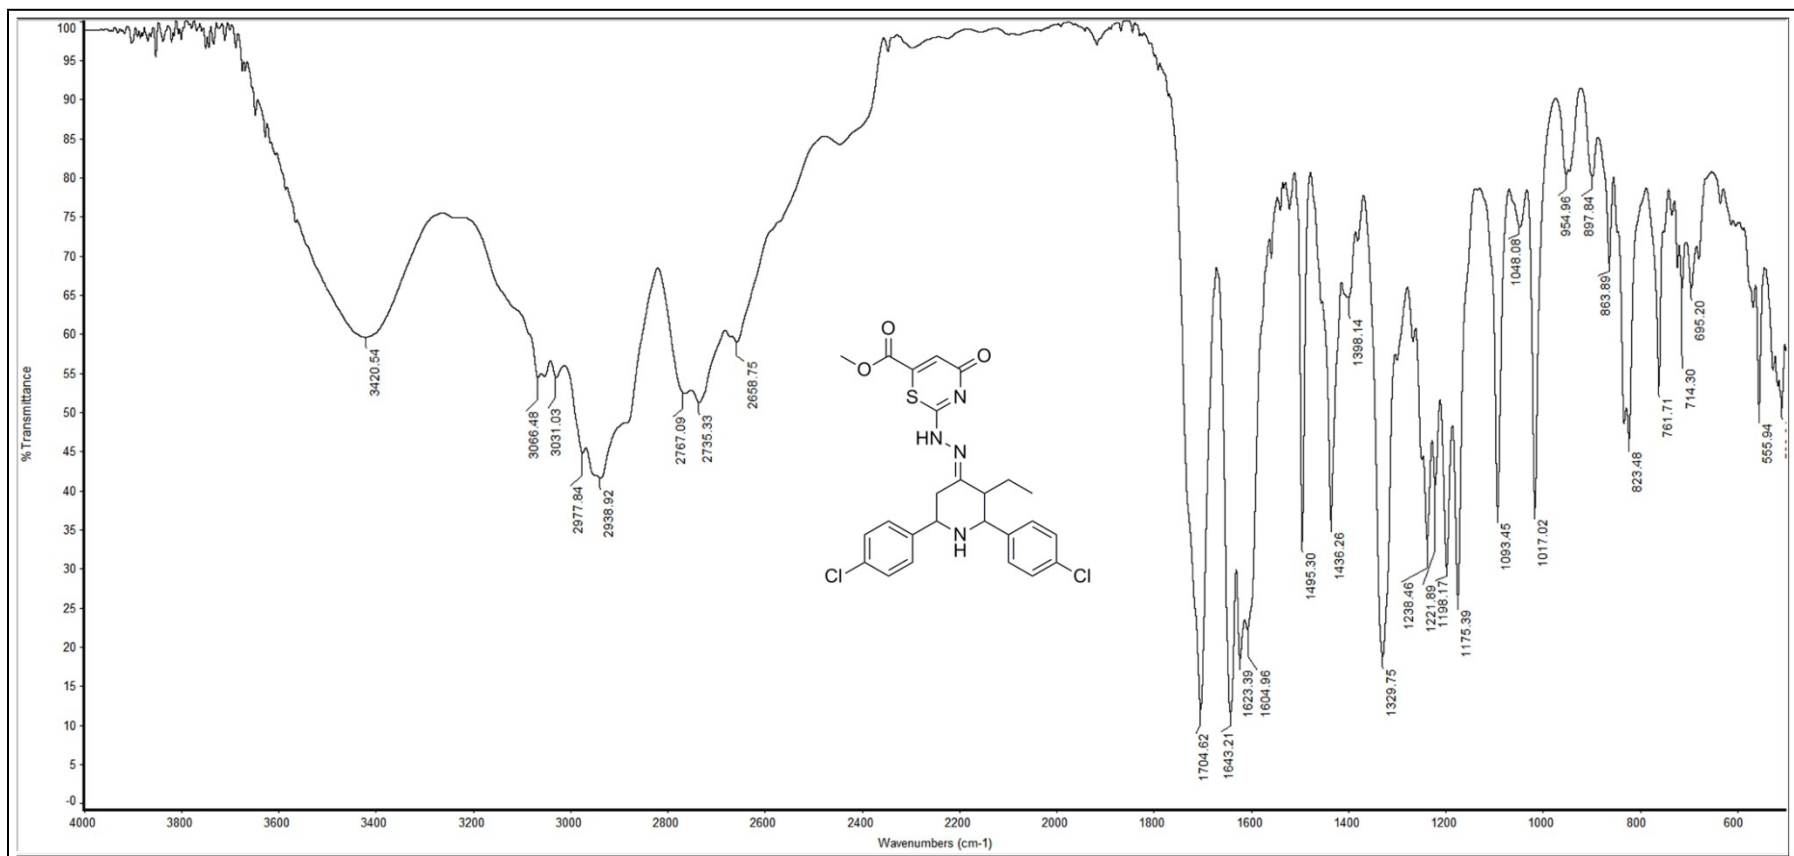

Fig. S 25 FT-IR spectrum of compound 22

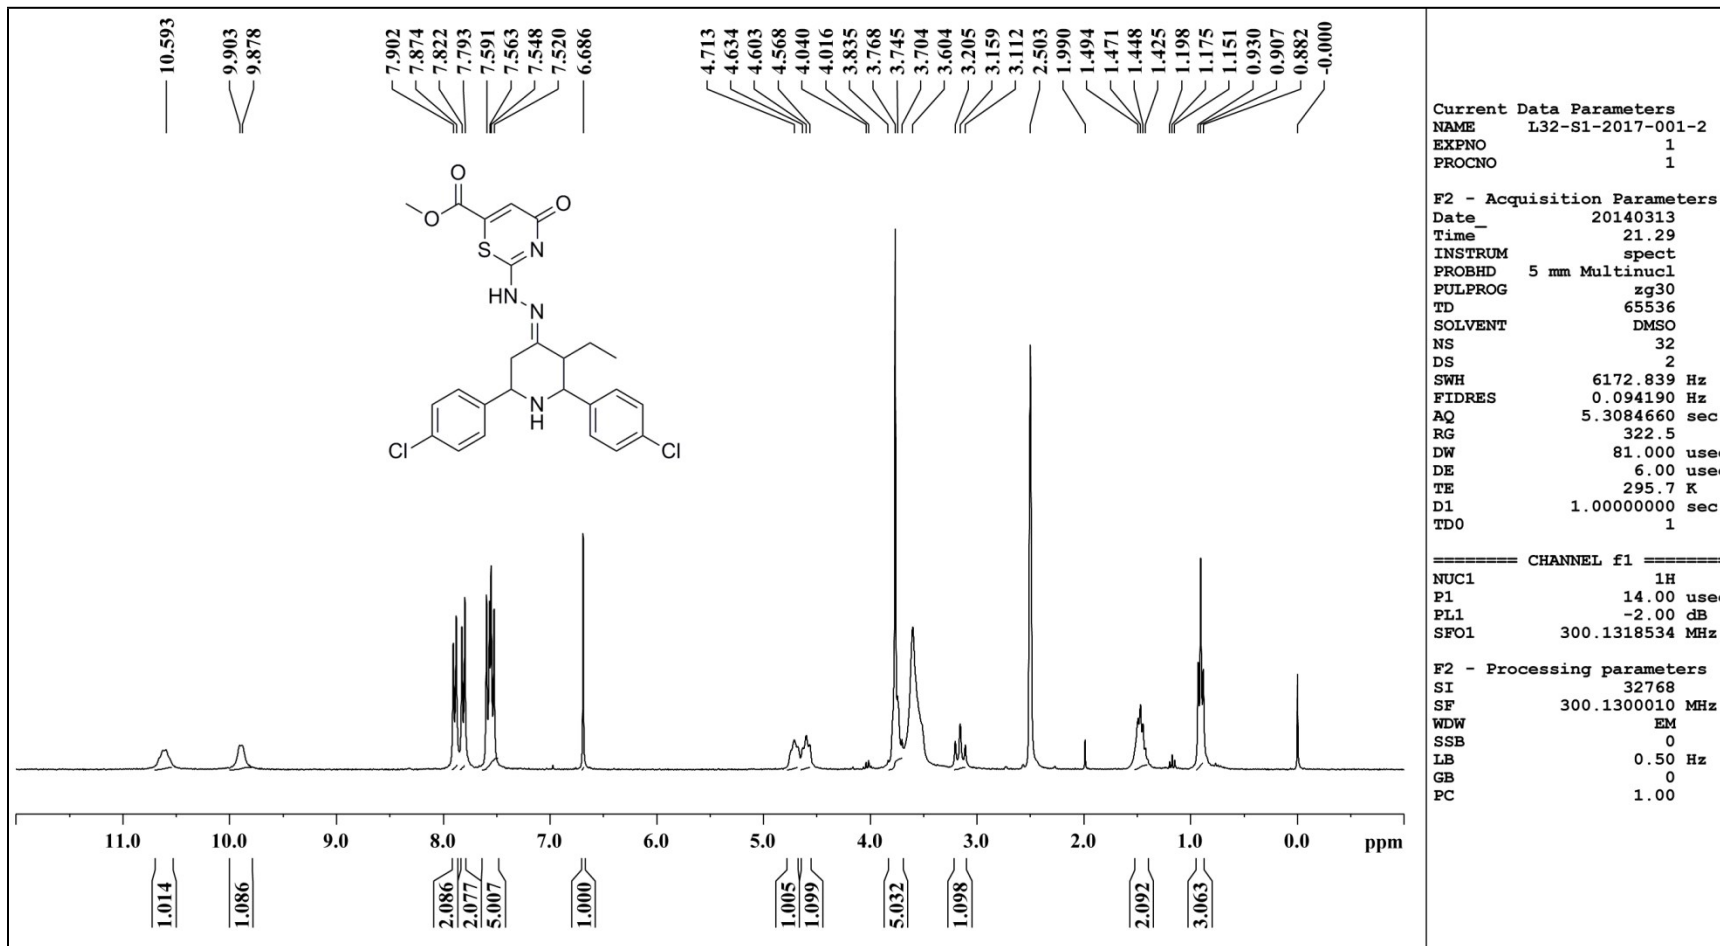

Fig. S 26 <sup>1</sup>H NMR Spectrum of compound 22

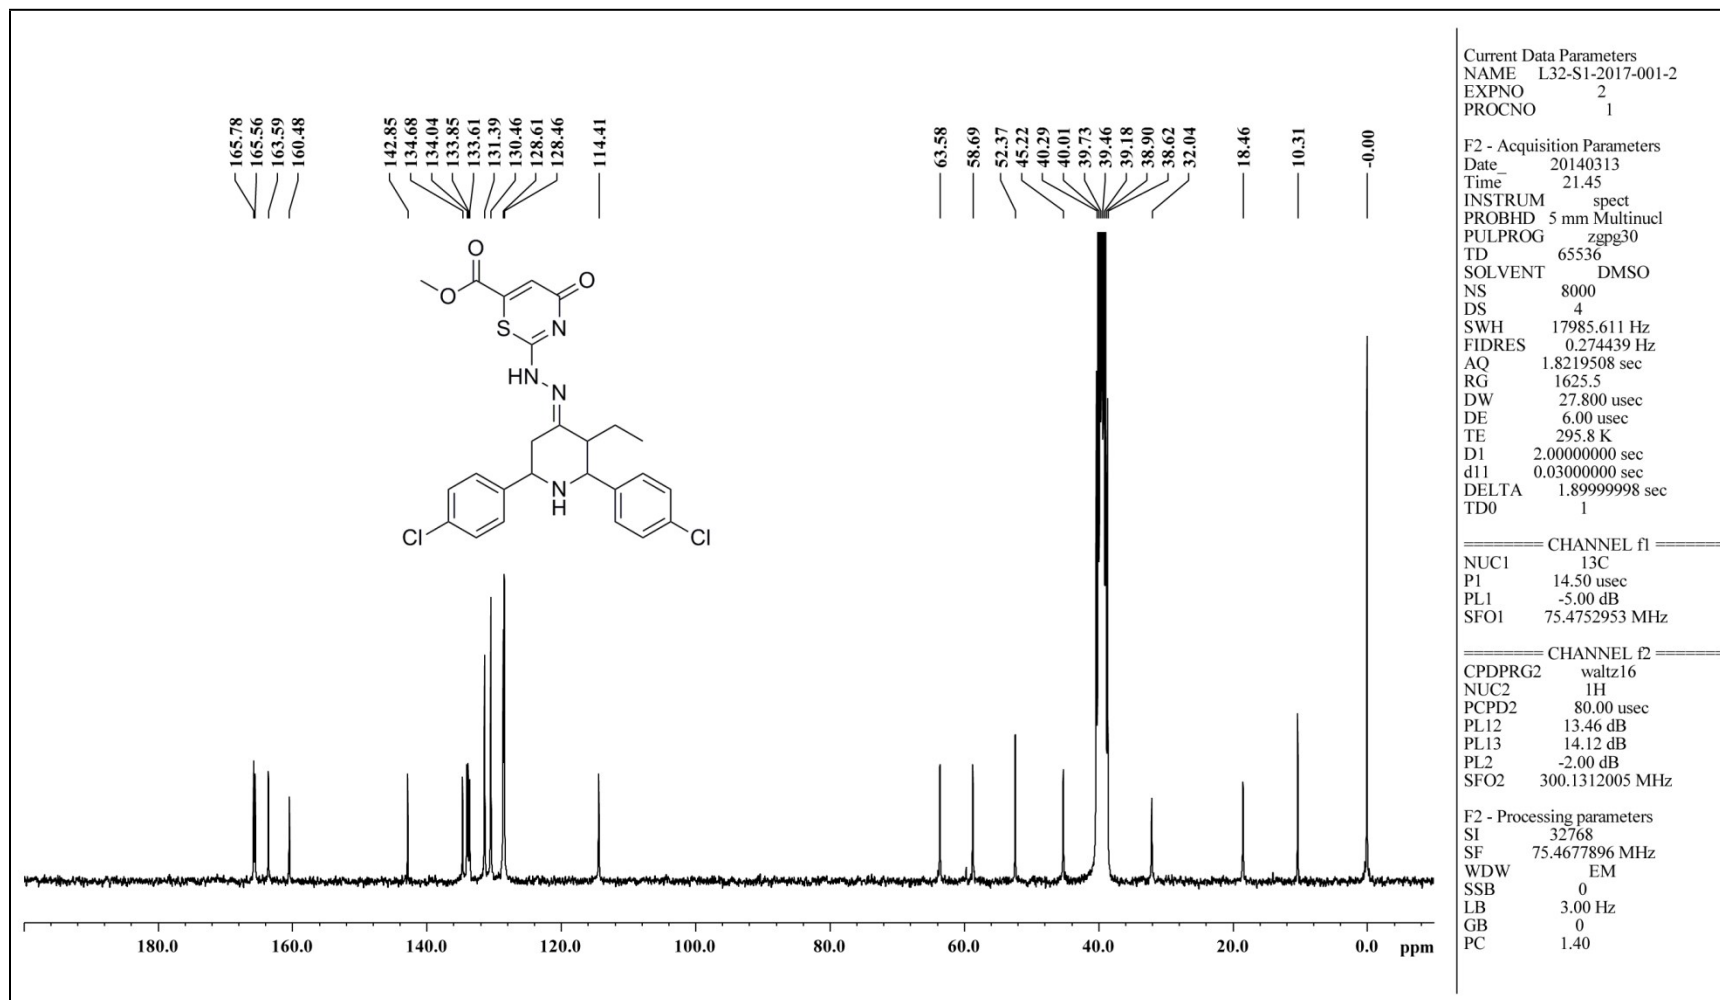

Fig. S 27 <sup>13</sup>C NMR spectrum of compound 22

Scan: #1756222  $\mu$ S: 1 IT: 0.95 NL: 3.56E8  
Type: FTMS + p ESI Full ms [200.00-1500.00]

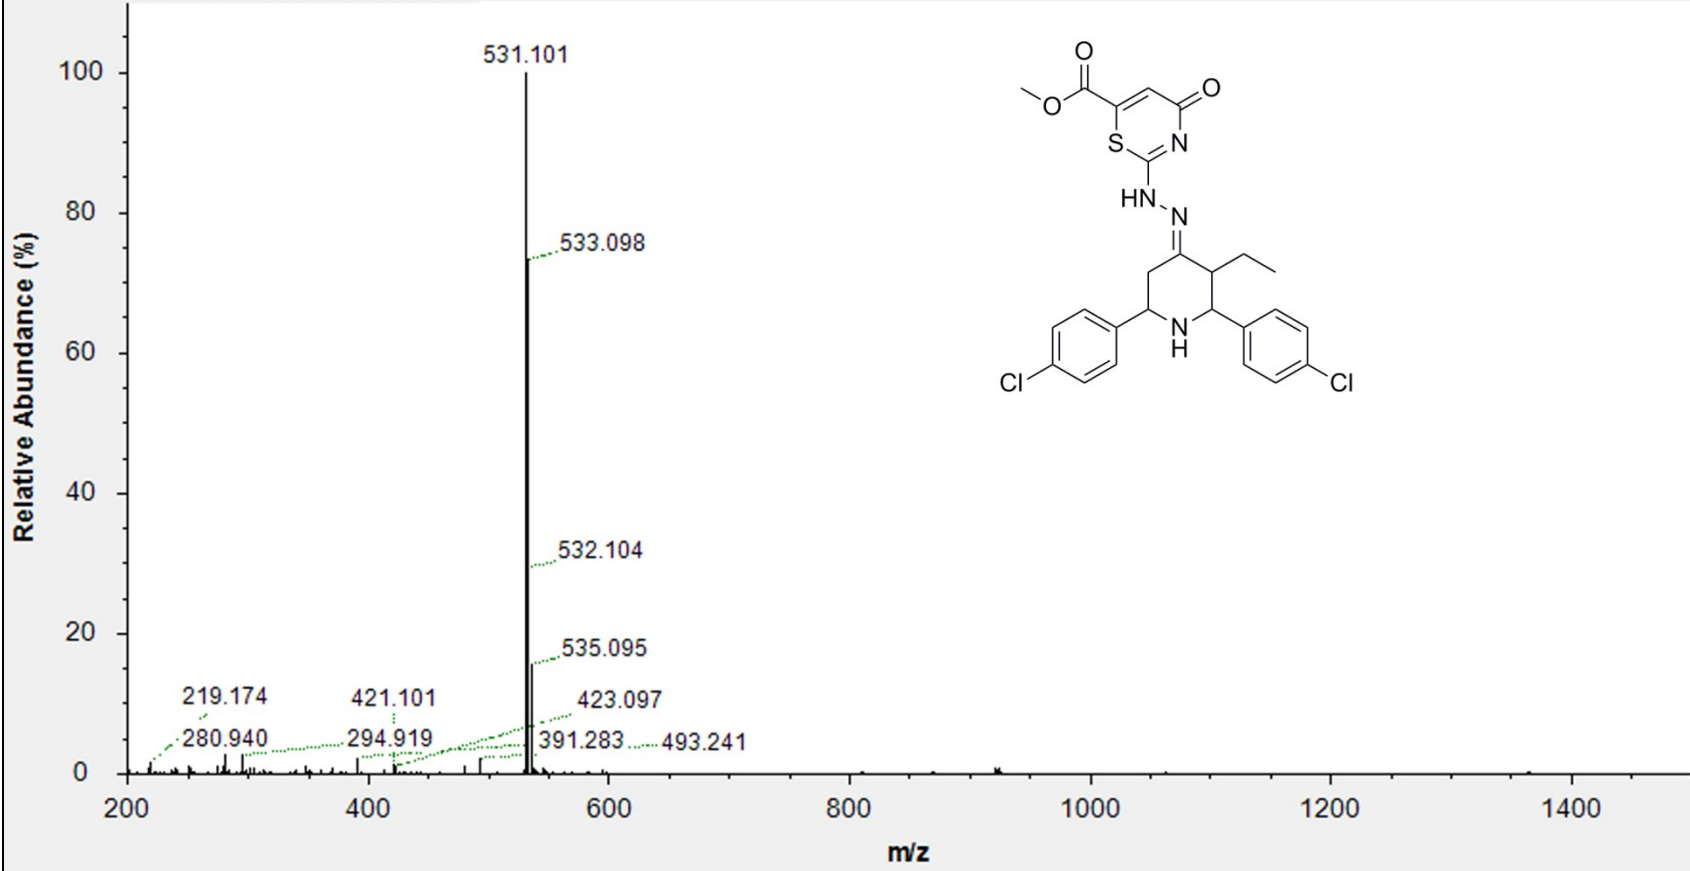

Fig. S 28 Mass spectrum of compound 22



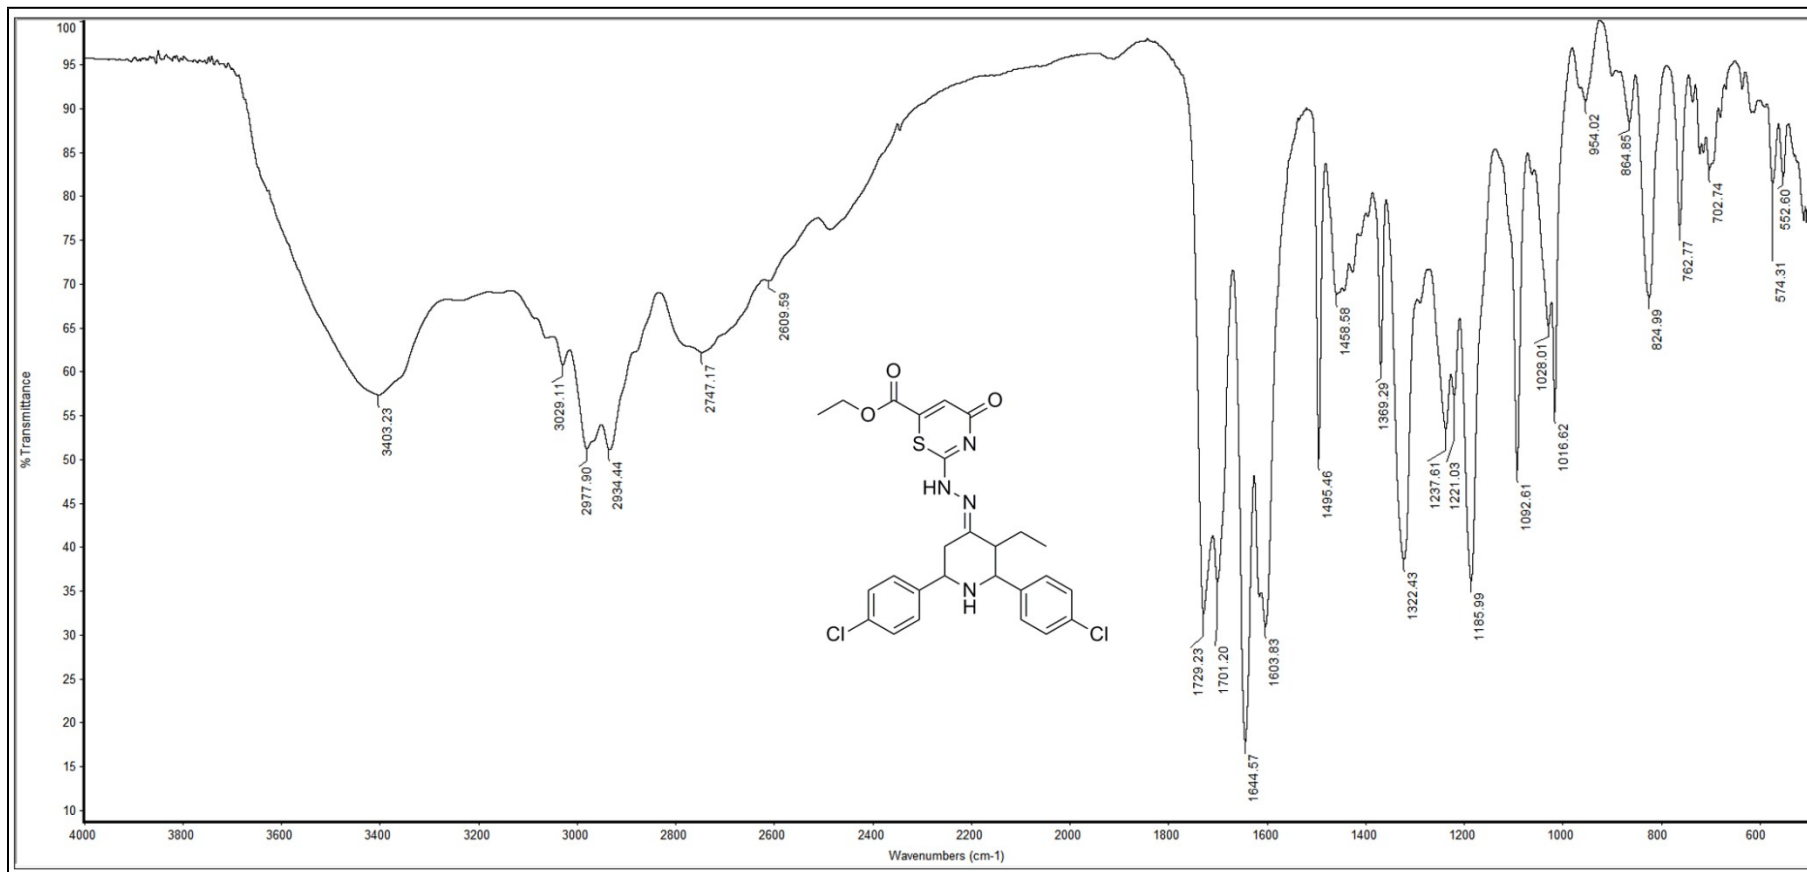

Fig. S 29 FT-IR spectrum of compound 23

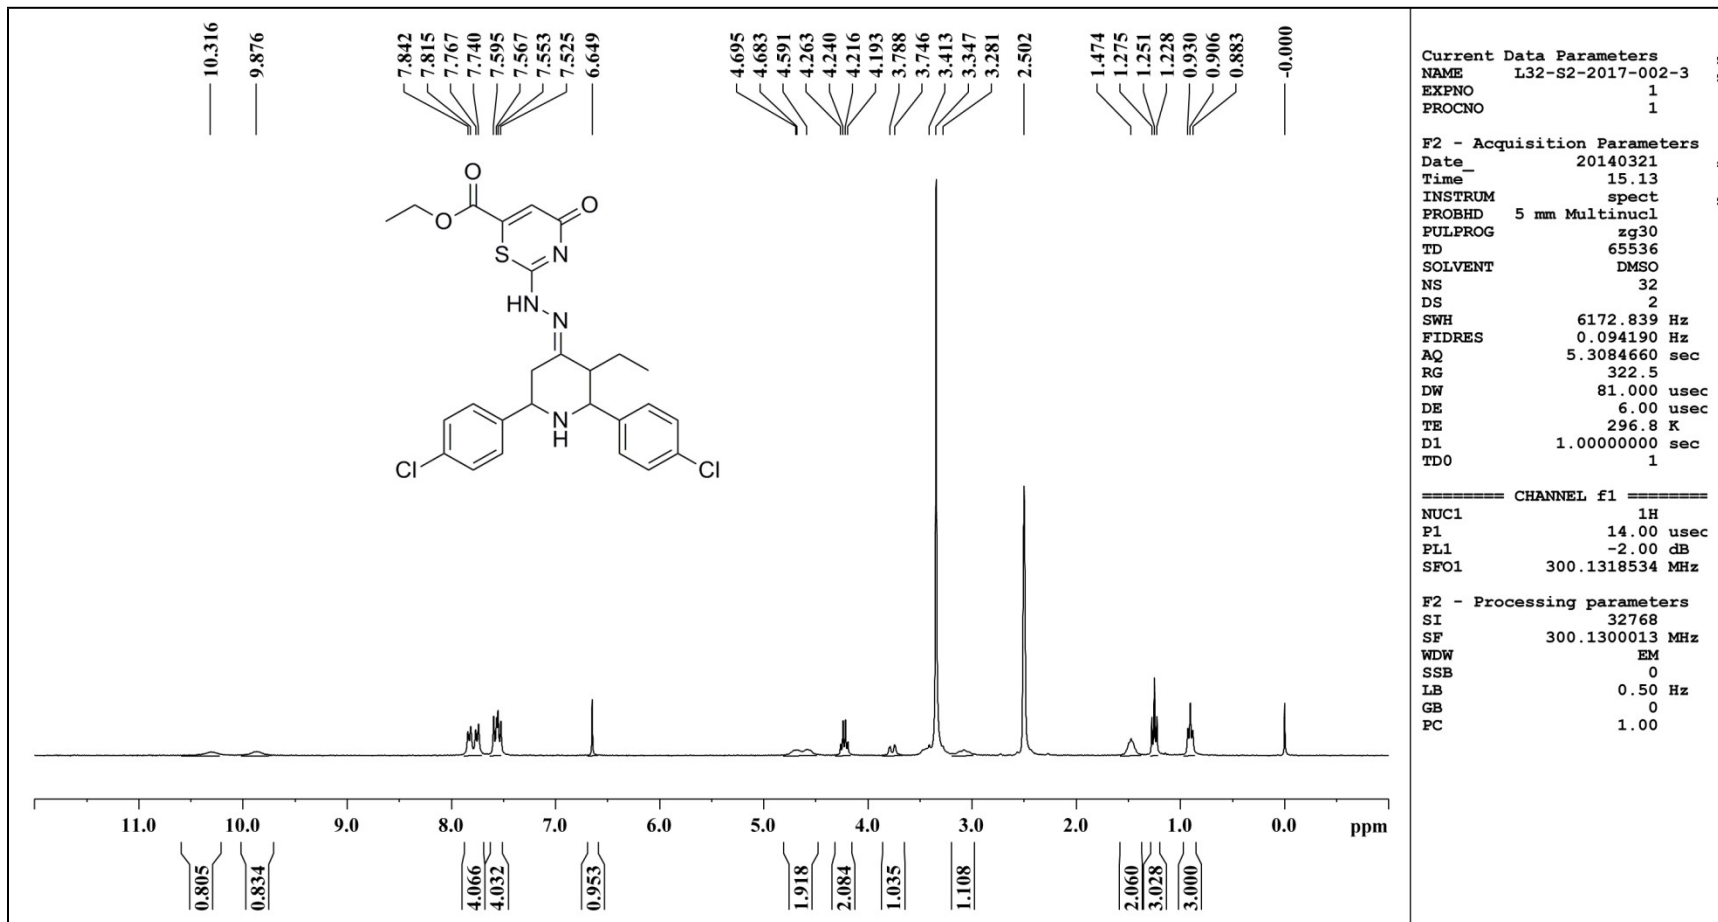

Fig. S 30 <sup>1</sup>H NMR Spectrum of compound 23

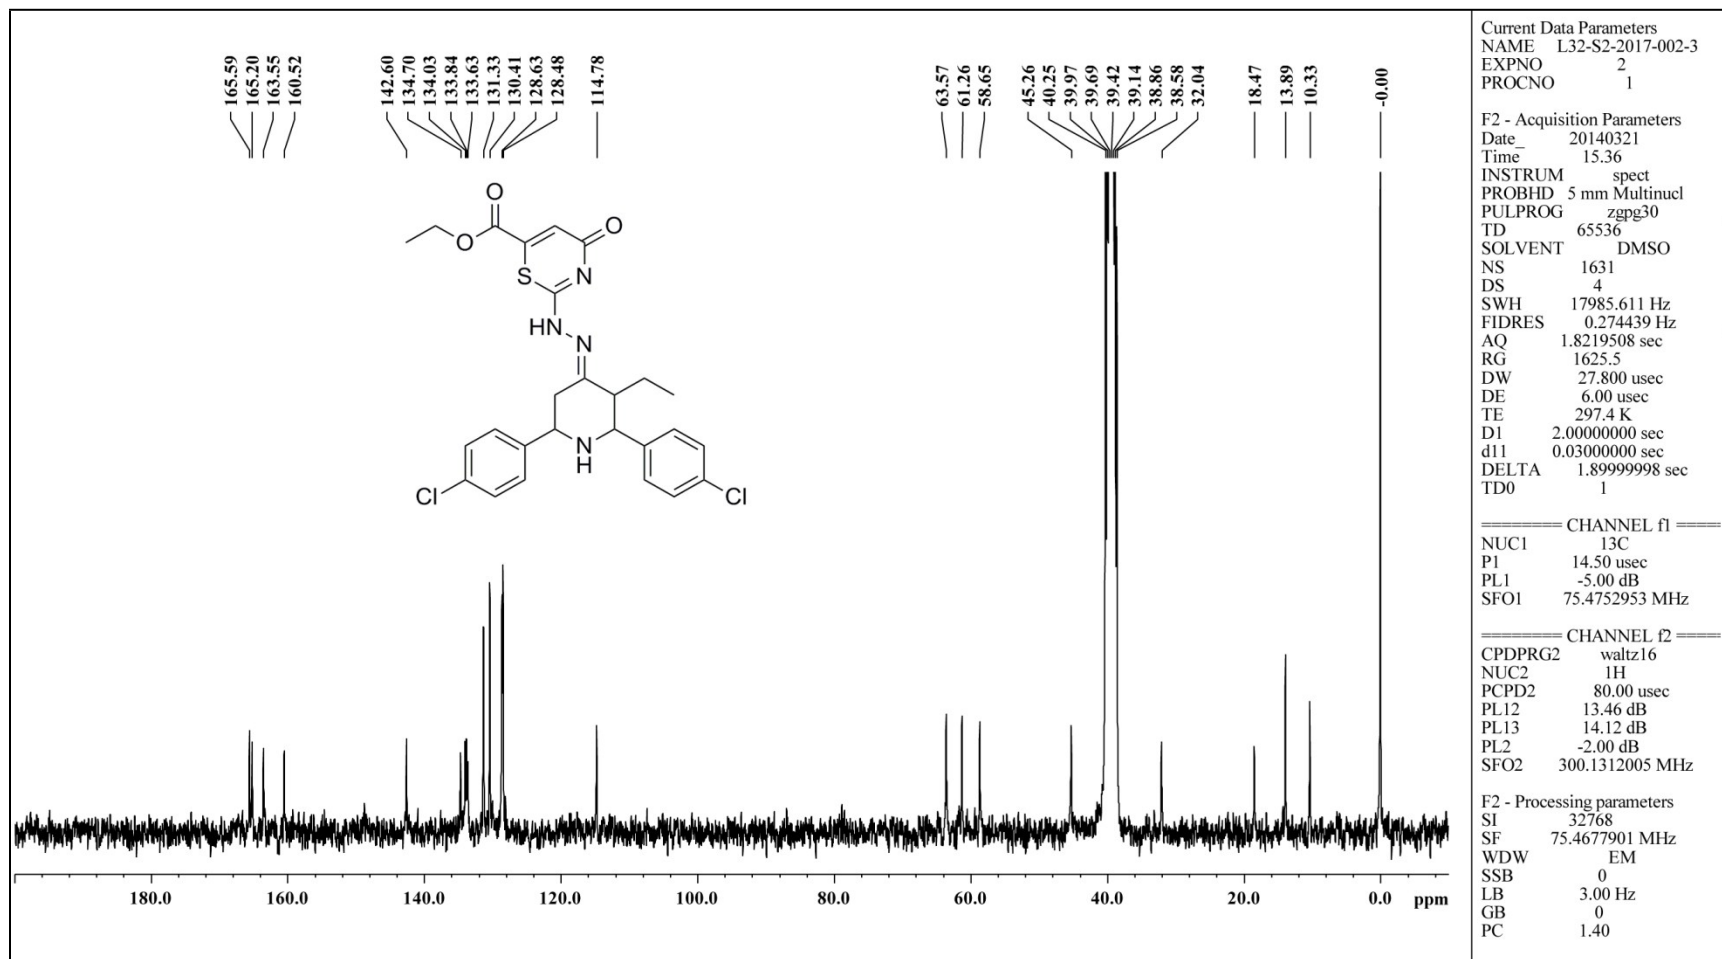

Fig. S 31 <sup>13</sup>C NMR spectrum of compound 23

Scan: #1811136  $\mu$ S: 1 IT: 0.33 NL: 2.46E8  
Type: FTMS + p ESI Full ms [150.00-1500.00]

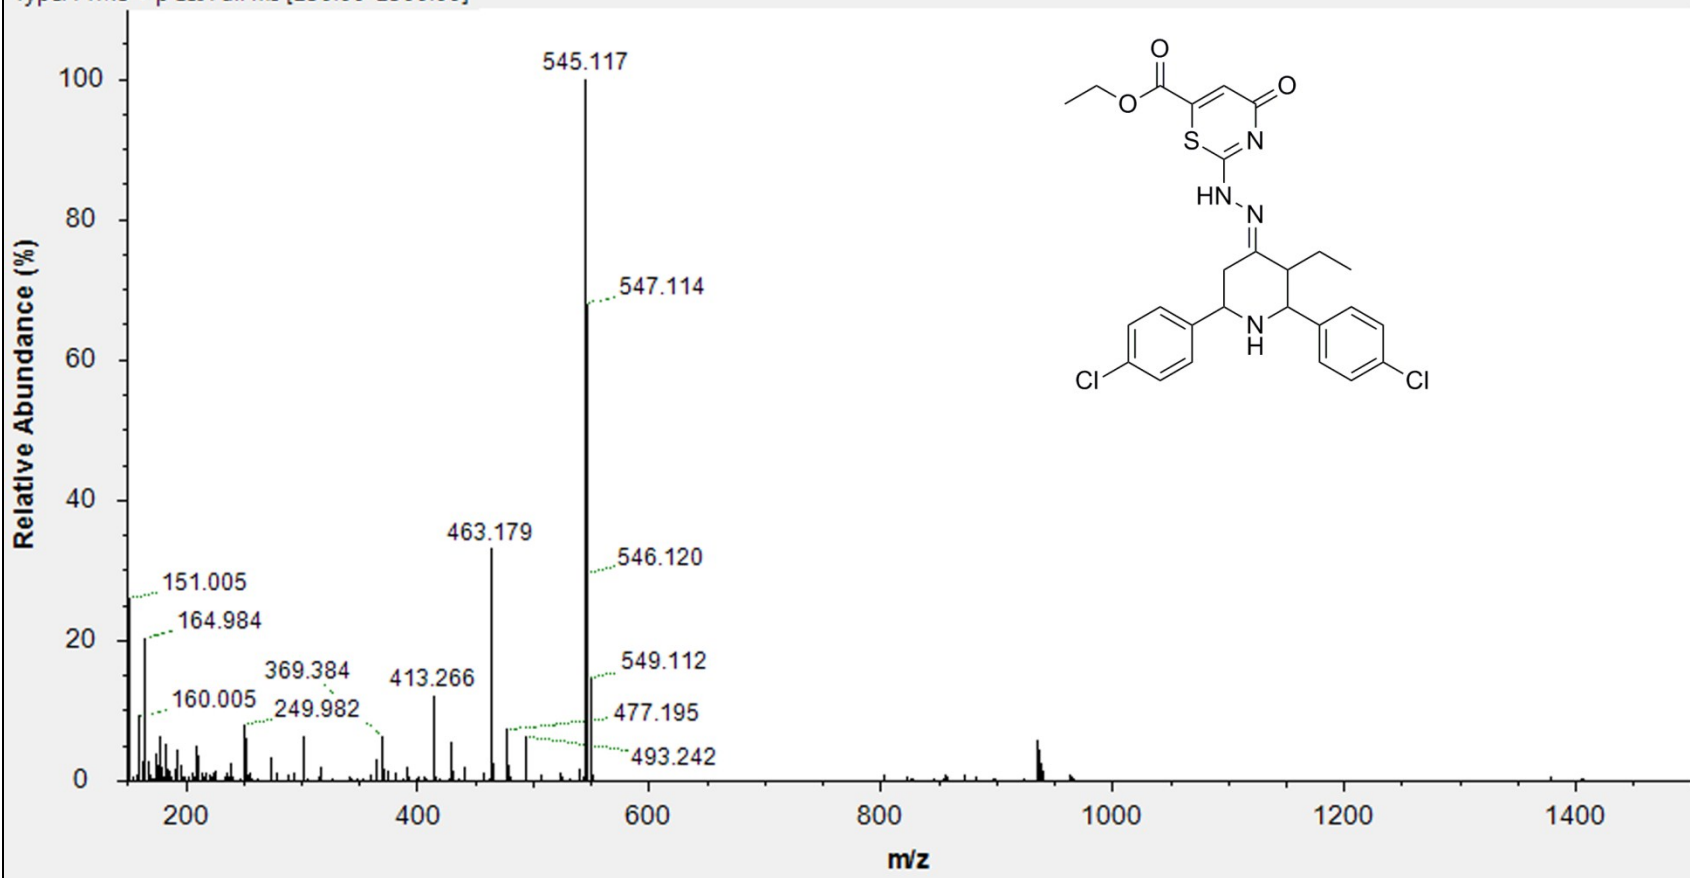

Fig. S 32 Mass spectrum of compound 23

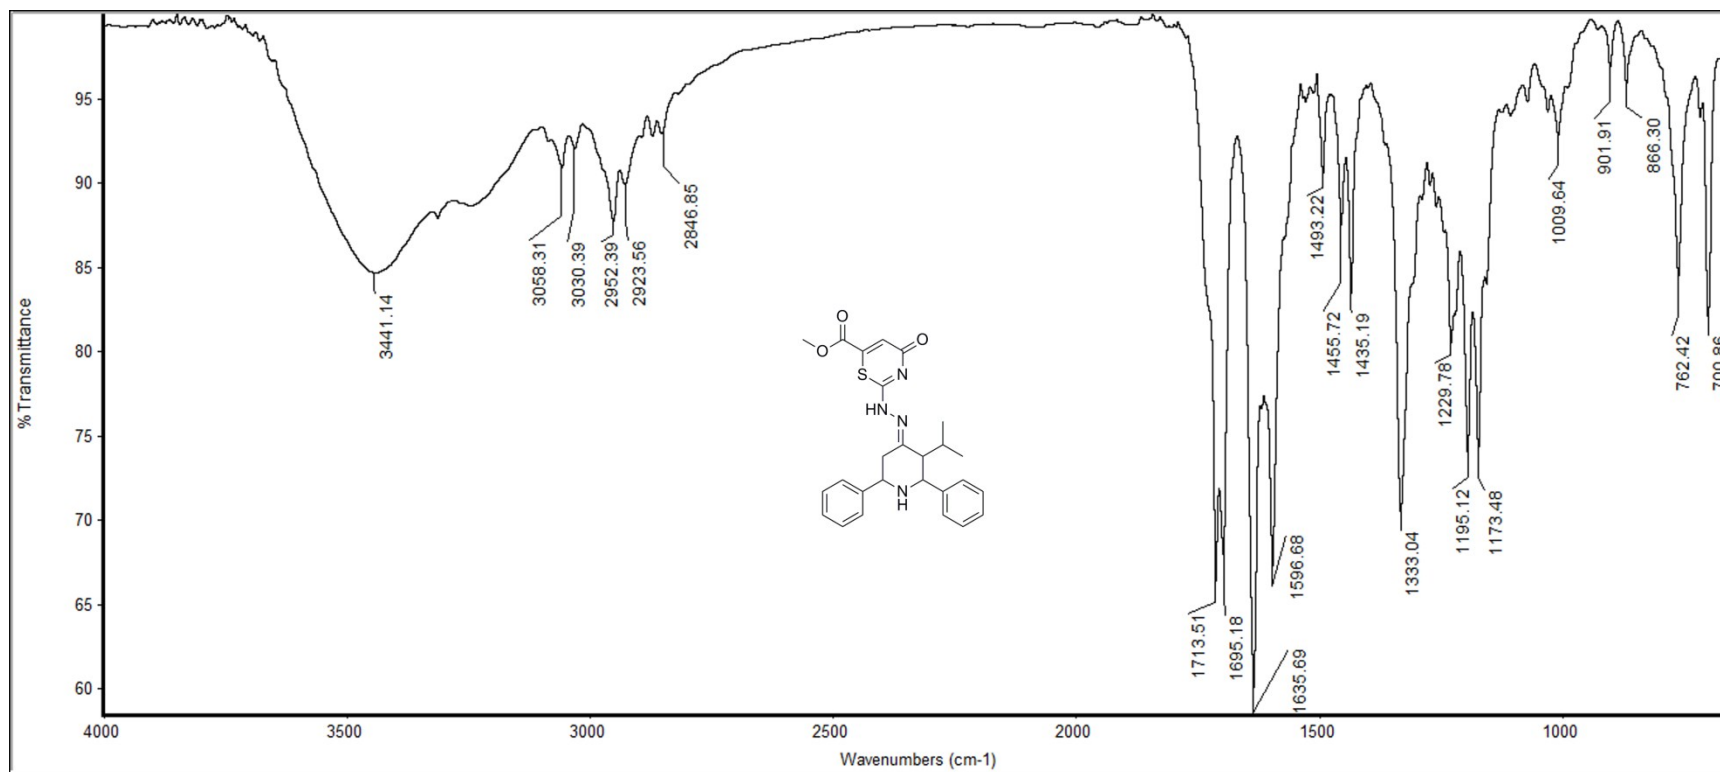

Fig. S 33 FT-IR spectrum of compound 24

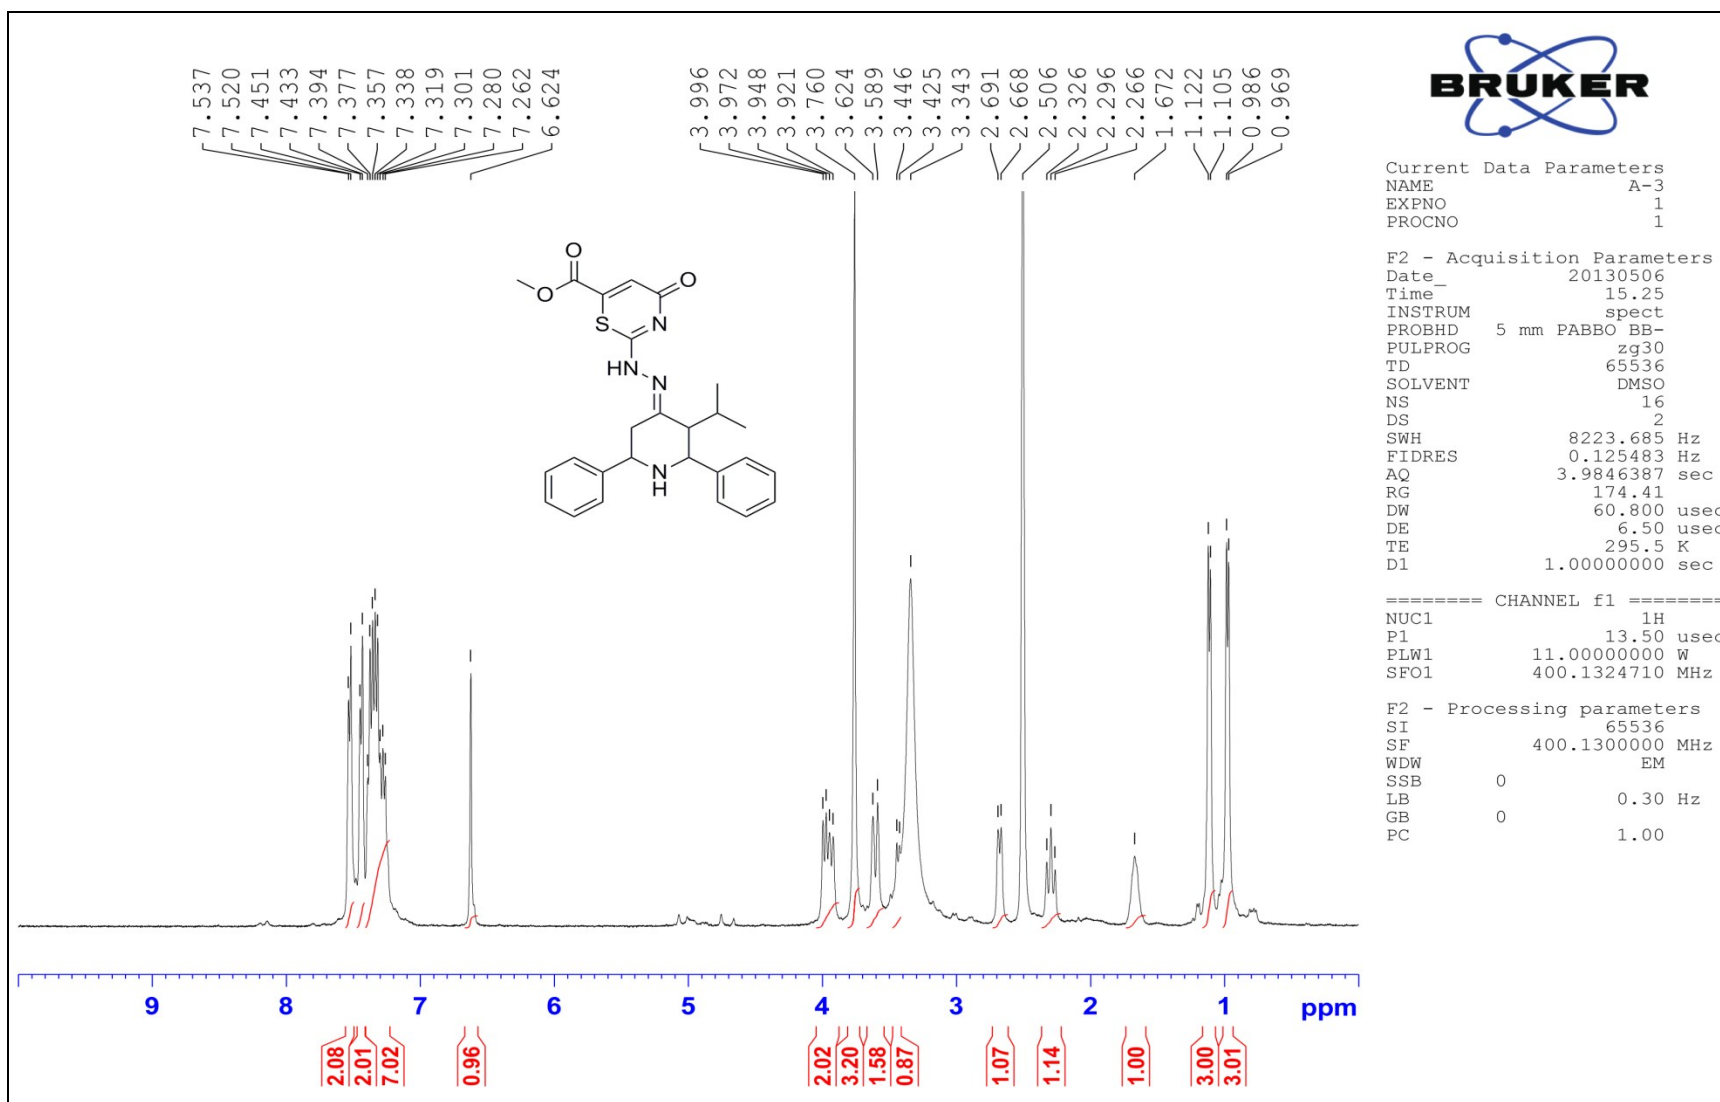

Fig. S 34 <sup>1</sup>H NMR Spectrum of Compound 24

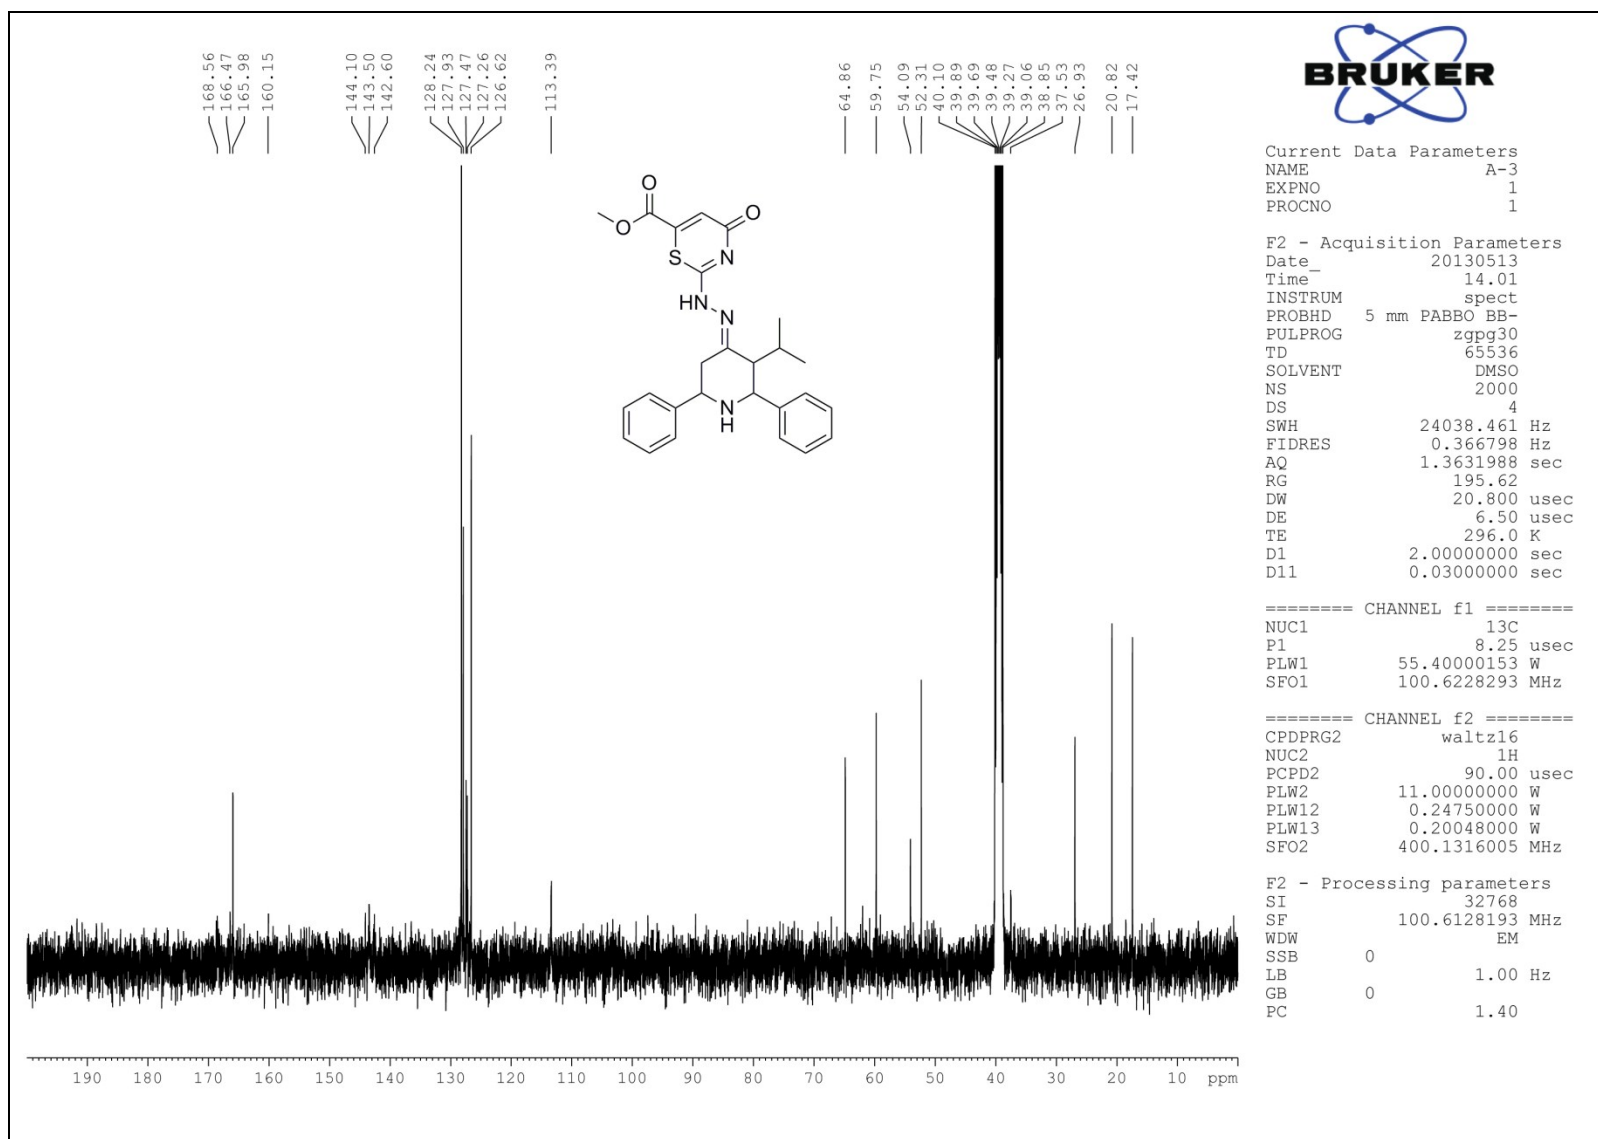

Fig. S 35 <sup>13</sup>C NMR spectrum of compound 24

Scan: #1809313  $\mu$ S: 1 IT: 0.46 NL: 1.25E9  
Type: FTMS + p ESI Full ms [150.00-1500.00]

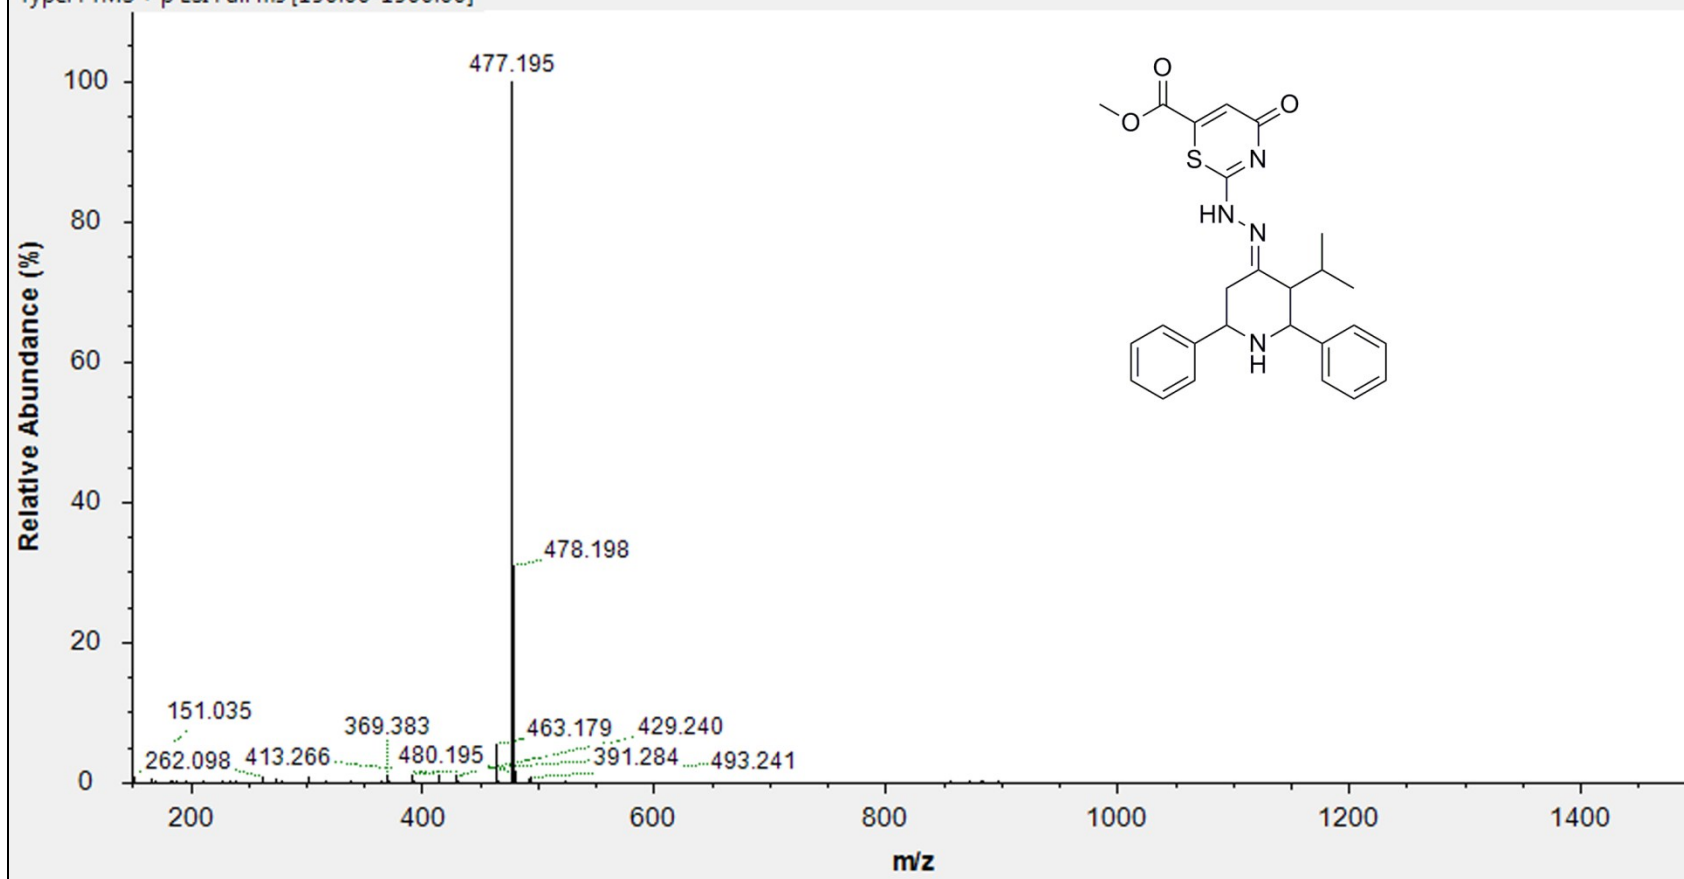

Fig. S 36 Mass spectrum of compound 24



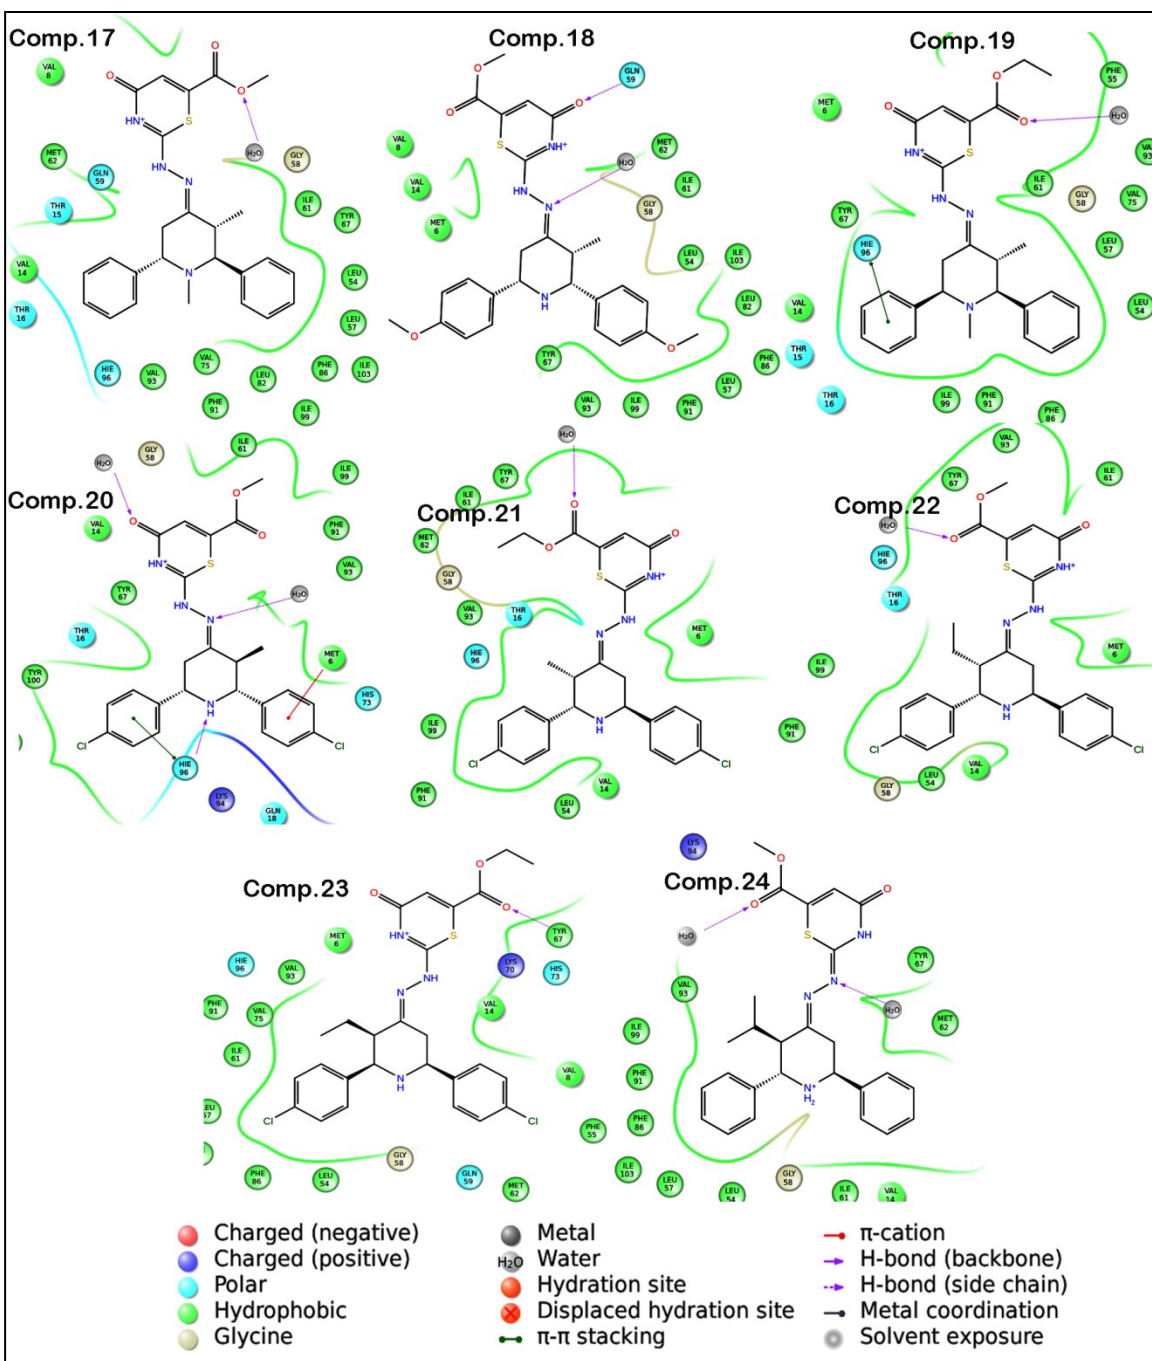

**Fig. S 37** 2D view of docking interactions of compounds **17-24** with MDM2 protein, PDB ID: 4ODE.

**TABLE S1** Pictorial representation of HOMO-LUMO of the compounds **17** and **25**

| S.No | Theory and Basis set     | Compound 25<br>(Five Membered Thiazolidinone Ring)                                                 |                                                                                                    | Compound 17<br>(Six Membered Thiazinone Ring)                                                       |                                                                                                      |
|------|--------------------------|----------------------------------------------------------------------------------------------------|----------------------------------------------------------------------------------------------------|-----------------------------------------------------------------------------------------------------|------------------------------------------------------------------------------------------------------|
|      |                          | HOMO                                                                                               | LUMO                                                                                               | HOMO                                                                                                | LUMO                                                                                                 |
| 1    | B3LYP<br>6-31G**         | 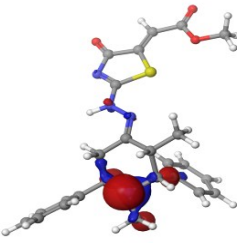<br>-6.25323 eV   | <br>-2.21995 eV   | <br>-6.09471 eV   | <br>-2.03881 eV   |
| 2    | B3LYP<br>6-311G**        | <br>-6.45011 eV   | <br>-2.40666 eV   | <br>-6.29522 eV   | <br>-2.22478 eV   |
| 3    | M06<br>6-31G**           | <br>-6.68936 eV  | <br>-2.04635 eV  | <br>-6.49410 eV  | <br>-1.82795 eV  |
| 4    | M06<br>6-311G**          | <br>-6.83343 eV | <br>-2.17766 eV | <br>-6.74034 eV | <br>-2.01053 eV |
| 5    | M06<br>6-311G<br>3DF 3PD | <br>-9.63510 eV | <br>-2.21219 eV | <br>-9.47792 eV | <br>-1.99972 eV |

**Table S 2** Cartesian Coordinates of Compound **17** for B3LYP/6-31G\*\* calculation

| <b>B3LYP/6-31G** calculation of Compound 17</b> |               |               |               |
|-------------------------------------------------|---------------|---------------|---------------|
| <b>Cartesian Coordinates</b>                    |               |               |               |
| final geometry:                                 |               |               |               |
| angstroms                                       |               |               |               |
| atom                                            | x             | y             | z             |
| N1                                              | 4.2403804901  | -1.7958503752 | 1.2022057897  |
| C2                                              | 3.7799636955  | -3.1288274870 | 1.6667984190  |
| C3                                              | 2.3507115468  | -3.0082103733 | 2.2717849878  |
| C4                                              | 1.4114907461  | -2.3470252934 | 1.2894256606  |
| C5                                              | 1.9309536511  | -1.0519517556 | 0.7193427674  |
| C6                                              | 3.3840820084  | -1.1774428471 | 0.1802429188  |
| C7                                              | 3.8631523101  | 0.2118655605  | -0.2162747587 |
| C8                                              | 5.6576273353  | -1.8133356299 | 0.8332956213  |
| C9                                              | 3.9650561429  | -4.2677065031 | 0.6574613769  |
| C10                                             | 1.8400445406  | -4.3235647375 | 2.8616573694  |
| N11                                             | 0.2830660423  | -2.9107839585 | 1.0379488313  |
| N12                                             | -0.5951101905 | -2.3279788817 | 0.1759030643  |
| C13                                             | 4.1596105876  | 1.1752452033  | 0.7576198409  |
| C14                                             | 4.5381425327  | 2.4634301399  | 0.3869764532  |
| C15                                             | 4.6191851454  | 2.8103619302  | -0.9636283763 |
| C16                                             | 4.3247697235  | 1.8594480332  | -1.9390155948 |
| C17                                             | 3.9518637534  | 0.5670584621  | -1.5650889639 |
| C18                                             | 3.1258332858  | -4.4778921161 | -0.4491441004 |
| C19                                             | 3.3791912425  | -5.5054288824 | -1.3583722238 |
| C20                                             | 4.4743119151  | -6.3500949790 | -1.1827770060 |
| C21                                             | 5.3127158959  | -6.1627275580 | -0.0848124154 |
| C22                                             | 5.0558525264  | -5.1341679586 | 0.8206808846  |
| C23                                             | -1.7569241488 | -2.9569661085 | -0.1748632901 |
| N24                                             | -2.5418447321 | -2.3412755523 | -0.9926049103 |
| C25                                             | -3.7526387086 | -2.8604734973 | -1.4492124191 |
| C26                                             | -4.1769264764 | -4.2006947079 | -0.9902355653 |
| C27                                             | -3.4937748052 | -4.9890986731 | -0.1411462703 |
| S28                                             | -1.9406438155 | -4.5632951028 | 0.5953506627  |
| O29                                             | -4.4569864357 | -2.2245658274 | -2.2212185275 |
| C30                                             | -4.0569411055 | -6.3298094131 | 0.2226233453  |
| O31                                             | -3.2454435701 | -6.9905003655 | 1.0705063958  |
| O32                                             | -5.1073435966 | -6.7667587002 | -0.1944486912 |
| C33                                             | -3.6980075362 | -8.2955792607 | 1.4749941094  |
| H34                                             | 4.4358022706  | -3.3689118173 | 2.5125576734  |
| H35                                             | 2.4736428354  | -2.2822233690 | 3.0901733158  |
| H36                                             | 1.9318462179  | -0.2994770099 | 1.5175172175  |
| H37                                             | 1.3115700210  | -0.6528881891 | -0.0886871408 |
| H38                                             | 3.3546833331  | -1.7882635837 | -0.7394687429 |
| H39                                             | 6.0160329100  | -0.7934036921 | 0.6887284585  |
| H40                                             | 6.2311947835  | -2.2607324036 | 1.6510697085  |
| H41                                             | 5.8708473641  | -2.3874102578 | -0.0825168775 |

|     |               |               |               |
|-----|---------------|---------------|---------------|
| H42 | 0.8926937324  | -4.1688555029 | 3.3834226072  |
| H43 | 1.6745333623  | -5.0758389568 | 2.0877656796  |
| H44 | 2.5675451973  | -4.7204909648 | 3.5772623819  |
| H45 | -0.4519884039 | -1.4160738603 | -0.2470079386 |
| H46 | 4.1096107383  | 0.8982219792  | 1.8070494476  |
| H47 | 4.7715756574  | 3.1986842156  | 1.1518228230  |
| H48 | 4.9122407208  | 3.8156320493  | -1.2520146667 |
| H49 | 4.3884183790  | 2.1195308771  | -2.9916731685 |
| H50 | 3.7293984450  | -0.1736306580 | -2.3295820061 |
| H51 | 2.2502651227  | -3.8581731710 | -0.5990052952 |
| H52 | 2.7111576600  | -5.6486512702 | -2.2029630042 |
| H53 | 4.6685878281  | -7.1498368700 | -1.8915222554 |
| H54 | 6.1657477643  | -6.8174828698 | 0.0695466571  |
| H55 | 5.7161489228  | -4.9997026241 | 1.6743617308  |
| H56 | -5.1206932266 | -4.5647481179 | -1.3828008229 |
| H57 | -2.9289481866 | -8.6762402941 | 2.1457607660  |
| H58 | -4.6588790476 | -8.2214976996 | 1.9890139995  |
| H59 | -3.8086729263 | -8.9452566718 | 0.6039366191  |

**Table S 3** Cartesian Coordinates of Compound **25** for B3LYP/6-31G\*\* calculation

| <b>B3LYP/6-31G** calculation of Compound 25</b> |               |               |               |
|-------------------------------------------------|---------------|---------------|---------------|
| <b>Cartesian Coordinates</b>                    |               |               |               |
| <b>final geometry:</b>                          |               |               |               |
|                                                 | angstroms     |               |               |
| atom                                            | x             | y             | z             |
| N1                                              | 0.2074957798  | 2.9341996528  | 1.1750342485  |
| C2                                              | 1.0454645928  | 4.0732126613  | 1.6265352771  |
| C3                                              | 0.1407942403  | 5.1678440157  | 2.2649897852  |
| C4                                              | -0.9579442333 | 5.5661118621  | 1.3071731034  |
| C5                                              | -1.7389147407 | 4.4031581895  | 0.7508887521  |
| C6                                              | -0.8167953500 | 3.2858085761  | 0.1820907313  |
| C7                                              | -1.6901845847 | 2.0985968457  | -0.1977441691 |
| C8                                              | 2.0575618222  | 4.5875411095  | 0.5958933843  |
| C9                                              | 1.0273508620  | 1.7881958177  | 0.7753193194  |
| C10                                             | 0.9379812847  | 6.3354843596  | 2.8479632538  |
| N11                                             | -1.1283480456 | 6.8160641416  | 1.0592956391  |
| N12                                             | -2.1236443500 | 7.2104850101  | 0.2077054766  |
| C13                                             | -2.2215606255 | 8.5041675296  | -0.1604113386 |
| C14                                             | -1.9585159257 | 1.8240805735  | -1.5415322289 |
| C15                                             | -2.8108395524 | 0.7776614521  | -1.8988280841 |
| C16                                             | -3.4006086734 | -0.0096519896 | -0.9116572222 |
| C17                                             | -3.1346527681 | 0.2541651086  | 0.4339887175  |
| C18                                             | -2.2886351592 | 1.3024344629  | 0.7881560049  |
| C19                                             | 3.3999527122  | 4.2047341611  | 0.7311373864  |
| C20                                             | 4.3673879993  | 4.5974132933  | -0.1927396703 |
| C21                                             | 4.0098730728  | 5.3905541013  | -1.2820069587 |

|     |               |               |               |
|-----|---------------|---------------|---------------|
| C22 | 2.6822961925  | 5.7888857542  | -1.4308095808 |
| C23 | 1.7179352246  | 5.3942008742  | -0.5030503470 |
| N24 | -3.1517949001 | 8.9188671402  | -0.9636969456 |
| C25 | -3.0250447156 | 10.2841244234 | -1.2081425887 |
| C26 | -1.8282293134 | 10.8951146970 | -0.4726872077 |
| S27 | -1.0027209633 | 9.6588111808  | 0.4748808189  |
| O28 | -3.7563759594 | 10.9424708807 | -1.9198205499 |
| C29 | -1.5280009434 | 12.1974533568 | -0.6069143012 |
| C30 | -0.4128332289 | 12.9339089495 | 0.0113545976  |
| O31 | 0.3585275132  | 12.1482491759 | 0.8045453554  |
| O32 | -0.1980795532 | 14.1165020765 | -0.1672459022 |
| C33 | 1.4693499921  | 12.8106244791 | 1.4299494414  |
| H34 | 1.6404682579  | 3.6681941130  | 2.4540223258  |
| H35 | -0.3667788403 | 4.6426135482  | 3.0882819620  |
| H36 | -2.3337178075 | 3.9681651931  | 1.5631265810  |
| H37 | -2.4414163827 | 4.6858714121  | -0.0382589194 |
| H38 | -0.3584352989 | 3.6652645302  | -0.7483537459 |
| H39 | 0.3956472076  | 0.9095805428  | 0.6395847966  |
| H40 | 1.5958004226  | 1.9525344171  | -0.1539363720 |
| H41 | 1.7438795040  | 1.5700060185  | 1.5732440604  |
| H42 | 0.2791805387  | 7.0203625247  | 3.3869291934  |
| H43 | 1.6927438421  | 5.9606033130  | 3.5467849414  |
| H44 | 1.4456491463  | 6.9066302049  | 2.0681762028  |
| H45 | -2.8151831317 | 6.5745562962  | -0.1778562484 |
| H46 | -1.4946261226 | 2.4313702752  | -2.3152393465 |
| H47 | -3.0088916526 | 0.5769792051  | -2.9477732790 |
| H48 | -4.0618957473 | -0.8259583549 | -1.1872381252 |
| H49 | -3.5870631769 | -0.3595321440 | 1.2077728153  |
| H50 | -2.0678189028 | 1.5003657013  | 1.8334408771  |
| H51 | 3.6921275354  | 3.5880731144  | 1.5779790273  |
| H52 | 5.3993532450  | 4.2854043298  | -0.0593539682 |
| H53 | 4.7590014827  | 5.7007745285  | -2.0045986959 |
| H54 | 2.3927921263  | 6.4174005937  | -2.2682031013 |
| H55 | 0.7020818067  | 5.7462444389  | -0.6331620858 |
| H56 | -2.1742256317 | 12.7860350928 | -1.2505805931 |
| H57 | 1.9756893752  | 12.0450386015 | 2.0169054379  |
| H58 | 2.1413858370  | 13.2255284804 | 0.6748753054  |
| H59 | 1.1184646317  | 13.6212276418 | 2.0730889666  |

**Table S 4** Cartesian Coordinates of Compound **17** for B3LYP/6-311G\*\* calculation

| <b>B3LYP/6-311G** calculation of Compound 17</b> |               |               |               |
|--------------------------------------------------|---------------|---------------|---------------|
| <b>Cartesian Coordinates</b>                     |               |               |               |
| final geometry:                                  |               |               |               |
| angstroms                                        |               |               |               |
| atom                                             | x             | y             | z             |
| N1                                               | -0.5720928596 | 4.3512604336  | 1.1294412766  |
| C2                                               | 0.4008926541  | 5.3874723680  | 1.5523704233  |
| C3                                               | -0.3542891944 | 6.6072911033  | 2.1465206312  |
| C4                                               | -1.3940575261 | 7.1183427787  | 1.1787916994  |
| C5                                               | -2.3008750383 | 6.0527065274  | 0.6186140722  |
| C6                                               | -1.5459010318 | 4.7901514013  | 0.1221463066  |
| C7                                               | -2.5777818114 | 3.7137923119  | -0.1907523444 |
| C8                                               | 1.4787837846  | 5.7373624456  | 0.5215552123  |
| C9                                               | 0.0940351629  | 3.0950384663  | 0.7796158896  |
| C10                                              | 0.5820768120  | 7.6783564178  | 2.7046686320  |
| N11                                              | -1.4626679075 | 8.3802493160  | 0.9629805235  |
| N12                                              | -2.4195598885 | 8.8891335699  | 0.1423837679  |
| C13                                              | -2.4960998550 | 10.2336075258 | -0.0892510801 |
| N14                                              | -3.4414950152 | 10.6481021481 | -0.8575771624 |
| C15                                              | -3.6523851147 | 11.9825203771 | -1.1889335508 |
| C16                                              | -2.7494557158 | 13.0086543841 | -0.6229122608 |
| C17                                              | -1.7123782229 | 12.7648548506 | 0.1919552168  |
| S18                                              | -1.2219806631 | 11.1611989025 | 0.7550998417  |
| O19                                              | -4.5608003632 | 12.3124849772 | -1.9293109863 |
| C20                                              | -0.8225679648 | 13.8332651877 | 0.7416594281  |
| O21                                              | -1.1769364471 | 15.0590118724 | 0.3301076524  |
| O22                                              | 0.1091179034  | 13.6046600635 | 1.4749832281  |
| C23                                              | -0.3628257868 | 16.1411208578 | 0.8224125318  |
| C24                                              | -2.8964699124 | 3.4070904657  | -1.5140685016 |
| C25                                              | -3.8831812095 | 2.4679104294  | -1.8117614433 |
| C26                                              | -4.5599041613 | 1.8188296922  | -0.7840723497 |
| C27                                              | -4.2444556646 | 2.1136232390  | 0.5422864529  |
| C28                                              | -3.2637904211 | 3.0552087892  | 0.8358654008  |
| C29                                              | 2.7724754448  | 5.2355194874  | 0.7083139934  |
| C30                                              | 3.7922596364  | 5.4902842151  | -0.2047036212 |
| C31                                              | 3.5369278644  | 6.2600114873  | -1.3357125199 |
| C32                                              | 2.2591216060  | 6.7746044182  | -1.5362813609 |
| C33                                              | 1.2429668810  | 6.5184825030  | -0.6184579735 |
| H34                                              | 0.9324441175  | 4.9370788164  | 2.3967796757  |
| H35                                              | -0.9267004693 | 6.1785455062  | 2.9816718917  |
| H36                                              | -2.9861333578 | 5.7444035602  | 1.4163316581  |
| H37                                              | -2.9200729358 | 6.4084022223  | -0.2077381201 |
| H38                                              | -1.0456654514 | 5.0427500315  | -0.8273646935 |
| H39                                              | -0.6423667375 | 2.2993692393  | 0.6753203415  |
| H40                                              | 0.6768740966  | 3.1515526897  | -0.1524059079 |
| H41                                              | 0.7751473668  | 2.8193822740  | 1.5882199255  |

|     |               |               |               |
|-----|---------------|---------------|---------------|
| H42 | 0.0152658807  | 8.4489802919  | 3.2286384672  |
| H43 | 1.2854589539  | 7.2280616266  | 3.4104413420  |
| H44 | 1.1541486041  | 8.1674822092  | 1.9157488109  |
| H45 | -3.1443018441 | 8.3327485379  | -0.2985560769 |
| H46 | -2.9687963512 | 14.0288763741 | -0.9103650940 |
| H47 | -0.7916087100 | 17.0419906866 | 0.3907373531  |
| H48 | -0.4001920195 | 16.1777324497 | 1.9117770253  |
| H49 | 0.6718121753  | 16.0124961293 | 0.5023643124  |
| H50 | -2.3658993445 | 3.9032007807  | -2.3204100658 |
| H51 | -4.1179473713 | 2.2426605767  | -2.8458900035 |
| H52 | -5.3256657553 | 1.0862827224  | -1.0123181311 |
| H53 | -4.7640174274 | 1.6077552815  | 1.3485022552  |
| H54 | -3.0077932935 | 3.2733168563  | 1.8668126246  |
| H55 | 2.9858882035  | 4.6375201491  | 1.5888142699  |
| H56 | 4.7846295979  | 5.0898958992  | -0.0299797103 |
| H57 | 4.3266774036  | 6.4634176482  | -2.0496691781 |
| H58 | 2.0510000472  | 7.3866221981  | -2.4066555436 |
| H59 | 0.2704113400  | 6.9595547602  | -0.7897844958 |

**Table S 5** Cartesian Coordinates of Compound **25** for B3LYP/6-311G\*\* calculation

| <b>B3LYP/6-311G** calculation of Compound 25</b> |               |               |               |
|--------------------------------------------------|---------------|---------------|---------------|
| Cartesian Coordinates                            |               |               |               |
| final geometry:                                  |               |               |               |
| angstroms                                        |               |               |               |
| atom                                             | x             | y             | z             |
| N1                                               | -0.8266795510 | -0.7938224394 | 1.1549265661  |
| C2                                               | 0.0538753306  | 0.3343355218  | 1.5417168180  |
| C3                                               | -0.8067720587 | 1.5122210690  | 2.0743487073  |
| C4                                               | -1.8703875222 | 1.8969800677  | 1.0742120769  |
| C5                                               | -2.6789665472 | 0.7380695672  | 0.5495575466  |
| C6                                               | -1.8166792573 | -0.4799372363 | 0.1178463115  |
| C7                                               | -2.7511407560 | -1.6517674291 | -0.1573357286 |
| C8                                               | 1.1150744392  | 0.7262013881  | 0.5086425420  |
| C9                                               | -3.0172803426 | -2.0484295718 | -1.4684925817 |
| C10                                              | -3.9132620750 | -3.0839488869 | -1.7330227897 |
| C11                                              | -4.5498034622 | -3.7394330253 | -0.6839179222 |
| C12                                              | -4.2862054679 | -3.3543168948 | 0.6305371032  |
| C13                                              | -3.3967397856 | -2.3173400187 | 0.8909228384  |
| C14                                              | 2.4399581608  | 0.3289841500  | 0.7266274924  |
| C15                                              | 3.4491080491  | 0.6240088018  | -0.1860437378 |
| C16                                              | 3.1516750921  | 1.3302727430  | -1.3477590811 |
| C17                                              | 1.8419789198  | 1.7412302808  | -1.5800827588 |
| C18                                              | 0.8361925443  | 1.4444330402  | -0.6626976682 |
| N19                                              | -2.0309268708 | 3.1405234003  | 0.8079763296  |
| C20                                              | 0.0313716324  | 2.6772386555  | 2.5993414292  |
| C21                                              | -0.0584990885 | -2.0082731982 | 0.8720887570  |

|     |               |               |               |
|-----|---------------|---------------|---------------|
| N22 | -3.0168500651 | 3.5378574473  | -0.0503800675 |
| C23 | -3.1743591106 | 4.8470572479  | -0.3341449328 |
| N24 | -4.1052114132 | 5.2671226132  | -1.1268088644 |
| C25 | -4.0655066930 | 6.6510511334  | -1.2629938217 |
| C26 | -2.9353339409 | 7.2756398855  | -0.4378460102 |
| S27 | -2.0481319432 | 6.0213140858  | 0.4221566213  |
| O28 | -4.8144787973 | 7.3120114131  | -1.9402625111 |
| C29 | -2.7291600880 | 8.5996913841  | -0.4350926909 |
| C30 | -1.6944814927 | 9.3462626833  | 0.2983069503  |
| O31 | -0.8989952061 | 8.5377552203  | 1.0406726861  |
| O32 | -1.5614950287 | 10.5462224129 | 0.2499546940  |
| C33 | 0.1380675659  | 9.1944946721  | 1.7890409533  |
| H34 | 0.6076869797  | -0.0342653830 | 2.4109867076  |
| H35 | -1.3564155288 | 1.0724714968  | 2.9188178438  |
| H36 | -3.3476152591 | 0.4096235123  | 1.3530457714  |
| H37 | -3.3135749251 | 1.0048450313  | -0.2985074995 |
| H38 | -1.3248690691 | -0.2284429514 | -0.8363571835 |
| H39 | -2.5158346911 | -1.5483117164 | -2.2909812879 |
| H40 | -4.1077536209 | -3.3793217460 | -2.7578583747 |
| H41 | -5.2438886180 | -4.5470653343 | -0.8863220128 |
| H42 | -4.7740035887 | -3.8649323413 | 1.4532915981  |
| H43 | -3.1786786514 | -2.0297602695 | 1.9135163429  |
| H44 | 2.6862432606  | -0.2185771505 | 1.6309457549  |
| H45 | 4.4659041888  | 0.3044777560  | 0.0127353973  |
| H46 | 3.9329057169  | 1.5647019518  | -2.0615492577 |
| H47 | 1.6000504892  | 2.3033625116  | -2.4750352237 |
| H48 | -0.1641718005 | 1.8047752552  | -0.8611128023 |
| H49 | -0.6039984529 | 3.4200483373  | 3.0833944006  |
| H50 | 0.7561854531  | 2.3131273535  | 3.3325423387  |
| H51 | 0.5760200224  | 3.1773455957  | 1.7978934801  |
| H52 | -0.7287012377 | -2.8632827265 | 0.7949391184  |
| H53 | 0.5337865387  | -1.9476618757 | -0.0535982977 |
| H54 | 0.6279161309  | -2.1927506746 | 1.7017690656  |
| H55 | -3.6842056611 | 2.8997178466  | -0.4714418389 |
| H56 | -3.3945135733 | 9.2046300434  | -1.0402132143 |
| H57 | 0.6643726731  | 8.4013509488  | 2.3152021766  |
| H58 | 0.8135122755  | 9.7260992693  | 1.1171959369  |
| H59 | -0.2943451997 | 9.9050698190  | 2.4949753027  |



**Table S 6** Cartesian Coordinates of Compound **17** for M06/6-31G\*\* calculation

| <b>M06/6-31G** calculation of Compound 17</b> |               |               |               |
|-----------------------------------------------|---------------|---------------|---------------|
| Cartesian Coordinates                         |               |               |               |
| final geometry:                               |               |               |               |
| angstroms                                     |               |               |               |
| atom                                          | x             | y             | z             |
| N1                                            | -1.0535743915 | -0.6646715602 | 0.9311166729  |
| C2                                            | 0.2045358425  | 0.0563695003  | 1.1578802812  |
| C3                                            | -0.0213754798 | 1.2790071067  | 2.0757524315  |
| C4                                            | -1.1001098012 | 2.1470403595  | 1.4732490533  |
| C5                                            | -2.3705774041 | 1.3831044613  | 1.2691241299  |
| C6                                            | -2.1525064980 | 0.1362564291  | 0.3966912129  |
| C7                                            | -3.4440720719 | -0.6444802685 | 0.3522648167  |
| C8                                            | 1.0114000055  | 0.3824427141  | -0.0893520838 |
| C9                                            | -0.8326170031 | -1.8788463540 | 0.1633233791  |
| C10                                           | 1.3072283664  | 1.8904311204  | 2.4991197588  |
| N11                                           | -1.1123487471 | 3.3645895097  | 1.0716689167  |
| N12                                           | -0.0202430304 | 4.1635386352  | 1.1242371355  |
| C13                                           | -0.0884560842 | 5.4364442332  | 0.6379813001  |
| N14                                           | 0.9806971790  | 6.1487504822  | 0.6878838869  |
| C15                                           | 1.0672228731  | 7.4558329064  | 0.2291874656  |
| C16                                           | -0.1352125593 | 8.0800206081  | -0.3544457168 |
| C17                                           | -1.3293802467 | 7.4857545996  | -0.4853245702 |
| S18                                           | -1.7085839147 | 5.8390566875  | 0.0143530951  |
| C19                                           | -2.5188103114 | 8.1475977147  | -1.0867812265 |
| O20                                           | -2.2686742658 | 9.4011305224  | -1.4739321558 |
| O21                                           | -3.5895056627 | 7.5983031418  | -1.2076413895 |
| C22                                           | -3.3789270404 | 10.0788839570 | -2.0606089271 |
| C23                                           | -4.2709592860 | -0.5662270366 | -0.7641145116 |
| C24                                           | -5.4979930999 | -1.2213253527 | -0.7833947925 |
| C25                                           | -5.9047735376 | -1.9667446505 | 0.3155626986  |
| C26                                           | -5.0811930684 | -2.0531457342 | 1.4345579235  |
| C27                                           | -3.8606875836 | -1.3928177854 | 1.4543458840  |
| C28                                           | 2.2073049611  | -0.3049610710 | -0.3037993635 |
| C29                                           | 2.9864717542  | -0.0709141309 | -1.4300629185 |
| C30                                           | 2.5783540358  | 0.8644451971  | -2.3724606326 |
| C31                                           | 1.3925061798  | 1.5613988872  | -2.1741489439 |
| C32                                           | 0.6165771485  | 1.3263715495  | -1.0449855289 |
| O33                                           | 2.1068151168  | 8.0847111639  | 0.2993491348  |
| H34                                           | 0.8276097381  | -0.6373972605 | 1.7473594410  |
| H35                                           | -0.4949023150 | 0.8556881480  | 2.9776607368  |
| H36                                           | -2.7599004425 | 1.0453540477  | 2.2413771286  |
| H37                                           | -3.1255560033 | 2.0274553198  | 0.8069401792  |
| H38                                           | -1.9331041712 | 0.4704999697  | -0.6399626934 |
| H39                                           | -1.7191296810 | -2.5178654639 | 0.2078736664  |
| H40                                           | -0.6008662982 | -1.6851546021 | -0.8999188035 |
| H41                                           | 0.0087796924  | -2.4343355596 | 0.5942990995  |

|     |               |               |               |
|-----|---------------|---------------|---------------|
| H42 | 1.1745809784  | 2.7223535332  | 3.1992995913  |
| H43 | 1.9033436093  | 1.1301867632  | 3.0175737776  |
| H44 | 1.9131490631  | 2.2180812373  | 1.6451925377  |
| H45 | 0.8935067854  | 3.8704677553  | 1.4557759820  |
| H46 | -0.0101896431 | 9.1033866816  | -0.6984600677 |
| H47 | -3.0194570327 | 11.0745585083 | -2.3203946526 |
| H48 | -3.7238649622 | 9.5498673398  | -2.9537415247 |
| H49 | -4.2087077922 | 10.1430991615 | -1.3508109220 |
| H50 | -3.9479769484 | 0.0156915898  | -1.6271456731 |
| H51 | -6.1352924177 | -1.1514965535 | -1.6618312502 |
| H52 | -6.8619212165 | -2.4827463721 | 0.3015794898  |
| H53 | -5.3937798203 | -2.6391490534 | 2.2959777574  |
| H54 | -3.2024762809 | -1.4639089569 | 2.3195952230  |
| H55 | 2.5317873073  | -1.0411387127 | 0.4325100939  |
| H56 | 3.9148543211  | -0.6197422816 | -1.5699497784 |
| H57 | 3.1835637221  | 1.0540383999  | -3.2555918949 |
| H58 | 1.0672490807  | 2.3015453409  | -2.9015287254 |
| H59 | -0.2957157634 | 1.9018753630  | -0.9106271285 |

**Table S 7** Cartesian Coordinates of Compound **25** for M06/6-31G\*\* calculation

| <b>M06/6-31G** calculation of Compound 25</b> |               |               |               |
|-----------------------------------------------|---------------|---------------|---------------|
| <b>Cartesian Coordinates</b>                  |               |               |               |
| final geometry:                               |               |               |               |
| angstroms                                     |               |               |               |
| atom                                          | x             | y             | z             |
| N1                                            | -0.7709369981 | -0.7424002530 | 1.1338732969  |
| C2                                            | -0.0375055481 | 0.4201048398  | 1.6620818492  |
| C3                                            | -1.0022346435 | 1.3468377647  | 2.4343154412  |
| C4                                            | -2.1414658892 | 1.7206059759  | 1.5341770142  |
| C5                                            | -2.8549382721 | 0.5488591454  | 0.9395810585  |
| C6                                            | -1.8728549744 | -0.4113054548 | 0.2376992701  |
| C7                                            | -2.6421055818 | -1.6355289138 | -0.1972390130 |
| C8                                            | 0.1355866957  | -1.7163660957 | 0.5466470389  |
| C9                                            | 0.8537794135  | 1.1349924684  | 0.6567860169  |
| C10                                           | -0.2844138583 | 2.5229403116  | 3.0681025273  |
| N11                                           | -2.3364474222 | 2.9641208236  | 1.3020468950  |
| N12                                           | -3.3006400832 | 3.3531711644  | 0.4207789480  |
| C13                                           | -3.2637868109 | 4.6121402065  | -0.0544585234 |
| N14                                           | -4.1335039099 | 5.0688711346  | -0.8919890371 |
| C15                                           | -3.8302902617 | 6.3790259629  | -1.2425002670 |
| C16                                           | -2.5686001075 | 6.8816974730  | -0.5498572640 |
| S17                                           | -1.8998829952 | 5.6361405128  | 0.4901183273  |

|     |               |               |               |
|-----|---------------|---------------|---------------|
| O18 | -4.4639324740 | 7.0685257338  | -2.0057383436 |
| C19 | -2.1147978285 | 8.1192875036  | -0.7822744868 |
| C20 | -0.9209188136 | 8.7531437968  | -0.2115555759 |
| O21 | -0.2584109587 | 7.9374391895  | 0.6342585135  |
| C22 | 0.9101929012  | 8.5031389479  | 1.2187945755  |
| O23 | -0.5619097359 | 9.8793638099  | -0.4663163588 |
| C24 | -2.9817143470 | -1.8087695720 | -1.5353712069 |
| C25 | -3.7475107569 | -2.8994922595 | -1.9353025169 |
| C26 | -4.1749408186 | -3.8289829427 | -0.9963419288 |
| C27 | -3.8347577488 | -3.6647216520 | 0.3437274070  |
| C28 | -3.0762115801 | -2.5729067418 | 0.7414680447  |
| C29 | 2.2348921496  | 0.9511142728  | 0.7548995002  |
| C30 | 3.1141764988  | 1.5396266051  | -0.1456304971 |
| C31 | 2.6253537653  | 2.3357848201  | -1.1737848894 |
| C32 | 1.2550468762  | 2.5386680862  | -1.2845577763 |
| C33 | 0.3788752582  | 1.9461679185  | -0.3822915251 |
| H34 | 0.6411401919  | 0.0042520893  | 2.4242935665  |
| H35 | -1.4256848304 | 0.7026185552  | 3.2234165800  |
| H36 | -3.3507675239 | -0.0082339266 | 1.7477728773  |
| H37 | -3.6341677843 | 0.8199307270  | 0.2171521845  |
| H38 | -1.5004184019 | 0.0868826994  | -0.6827291327 |
| H39 | -0.3874026890 | -2.6603291921 | 0.3696682496  |
| H40 | 0.5738291353  | -1.3797608351 | -0.4102225875 |
| H41 | 0.9587844265  | -1.9102833650 | 1.2438408397  |
| H42 | -0.9637271751 | 3.1038544721  | 3.6990150588  |
| H43 | 0.5464631598  | 2.1654364980  | 3.6874599841  |
| H44 | 0.1210295018  | 3.2003031240  | 2.3094273984  |
| H45 | -4.0312428815 | 2.7405824885  | 0.0664971728  |
| H46 | -2.6880258042 | 8.7314736614  | -1.4758694351 |
| H47 | 1.3302928218  | 7.7319156445  | 1.8648310689  |
| H48 | 1.6289023981  | 8.7881577438  | 0.4446240554  |
| H49 | 0.6568764229  | 9.3945372136  | 1.8005189112  |
| H50 | -2.6383285425 | -1.0824133015 | -2.2718338661 |
| H51 | -4.0055077609 | -3.0243606579 | -2.9842806994 |
| H52 | -4.7705008369 | -4.6840898240 | -1.3069411110 |
| H53 | -4.1625667567 | -4.3938703310 | 1.0810729687  |
| H54 | -2.7902781004 | -2.4449118432 | 1.7850293247  |
| H55 | 2.6277657715  | 0.3287433967  | 1.5595148090  |
| H56 | 4.1842690746  | 1.3757922602  | -0.0414287295 |
| H57 | 3.3075797726  | 2.8010430602  | -1.8808299889 |
| H58 | 0.8585561666  | 3.1701231056  | -2.0762595544 |

|     |               |              |               |
|-----|---------------|--------------|---------------|
| H59 | -0.6834535351 | 2.1500838741 | -0.4884968220 |
|-----|---------------|--------------|---------------|

**Table S 8** Cartesian Coordinates of Compound **17** for M06/6-311G\*\* calculation

| <b>M06/6-311G** calculation of Compound 17</b> |               |               |               |
|------------------------------------------------|---------------|---------------|---------------|
| <b>Cartesian Coordinates</b>                   |               |               |               |
| final geometry:                                |               |               |               |
| angstroms                                      |               |               |               |
| atom                                           | x             | y             | z             |
| N1                                             | -3.2710093143 | -2.1738792113 | 1.1299415661  |
| C2                                             | -2.3511499707 | -1.1225554706 | 1.5902089968  |
| C3                                             | -3.1400658049 | 0.0298272611  | 2.2373474549  |
| C4                                             | -4.1910188430 | 0.5301523145  | 1.2941823263  |
| C5                                             | -5.0707471358 | -0.5426919750 | 0.7356548183  |
| C6                                             | -4.2784458505 | -1.7350276351 | 0.1743471310  |
| C7                                             | -5.2591021536 | -2.8343403746 | -0.1610329786 |
| C8                                             | -1.3216694451 | -0.6768589440 | 0.5663908417  |
| N9                                             | -4.2519067618 | 1.7837768458  | 1.0624773334  |
| N10                                            | -5.1771242197 | 2.2829765001  | 0.2157629600  |
| C11                                            | -5.2010574008 | 3.6167342096  | -0.0678019378 |
| C12                                            | -5.6048070462 | -3.0843183667 | -1.4825626670 |
| C13                                            | -6.5530455904 | -4.0494414790 | -1.7966402053 |
| C14                                            | -7.1596327055 | -4.7786718087 | -0.7869812768 |
| C15                                            | -6.8145607911 | -4.5394665573 | 0.5376589316  |
| C16                                            | -5.8736927522 | -3.5721220686 | 0.8483702461  |
| C17                                            | -0.0023206928 | -1.0955748228 | 0.7255247948  |
| C18                                            | 0.9829775560  | -0.7531032679 | -0.1880039000 |
| C19                                            | 0.6636310972  | 0.0237553093  | -1.2904030408 |
| C20                                            | -0.6421933644 | 0.4574065727  | -1.4626377124 |
| C21                                            | -1.6239238426 | 0.1135926216  | -0.5449305751 |
| C22                                            | -2.2352223209 | 1.1084075527  | 2.7976579827  |
| C23                                            | -2.5496128357 | -3.3455322539 | 0.6641263640  |
| N24                                            | -6.1086111564 | 4.0354271839  | -0.8671017403 |
| C25                                            | -6.2594664708 | 5.3566294647  | -1.2595840512 |
| C26                                            | -5.3143397525 | 6.3537821519  | -0.7269740350 |
| C27                                            | -4.3103740695 | 6.0969698616  | 0.1162313612  |
| S28                                            | -3.9071131994 | 4.5108769474  | 0.7667291422  |
| O29                                            | -7.1380052648 | 5.6945936819  | -2.0191462590 |
| C30                                            | -3.3809385451 | 7.1409837905  | 0.6281539379  |
| O31                                            | -3.6617506842 | 8.3501013708  | 0.1463085599  |

|     |               |               |               |
|-----|---------------|---------------|---------------|
| O32 | -2.4819578972 | 6.9056304573  | 1.3901131469  |
| C33 | -2.8080401918 | 9.3983751217  | 0.5980140291  |
| H34 | -1.7812068114 | -1.5847596694 | 2.4100661537  |
| H35 | -3.6869673319 | -0.4497732857 | 3.0667046409  |
| H36 | -5.7072696531 | -0.9152044421 | 1.5510993802  |
| H37 | -5.7459010383 | -0.1931552090 | -0.0529587715 |
| H38 | -3.8061004109 | -1.4216990698 | -0.7794038263 |
| H39 | -5.9079666223 | 1.7309515516  | -0.2275717013 |
| H40 | -5.1219519578 | -2.5181617365 | -2.2760499507 |
| H41 | -6.8134375793 | -4.2336903383 | -2.8341791424 |
| H42 | -7.8985165300 | -5.5358125027 | -1.0293758669 |
| H43 | -7.2828149862 | -5.1125907988 | 1.3319410411  |
| H44 | -5.5869399224 | -3.3916697472 | 1.8816467321  |
| H45 | 0.2561878234  | -1.7048525333 | 1.5894680767  |
| H46 | 2.0027116777  | -1.0930176247 | -0.0360759285 |
| H47 | 1.4296407351  | 0.2964413266  | -2.0091409273 |
| H48 | -0.9008769766 | 1.0770713562  | -2.3155089627 |
| H49 | -2.6283197616 | 0.4955920818  | -0.6954456010 |
| H50 | -2.8088935635 | 1.8410372344  | 3.3706705183  |
| H51 | -1.4827009079 | 0.6633443359  | 3.4574162452  |
| H52 | -1.7143703756 | 1.6502795394  | 2.0032604310  |
| H53 | -3.2294901900 | -4.1944651212 | 0.5617796588  |
| H54 | -2.0494499723 | -3.1870974697 | -0.3080633654 |
| H55 | -1.7833283811 | -3.6134303149 | 1.3980295520  |
| H56 | -5.4733381292 | 7.3720225011  | -1.0661010955 |
| H57 | -3.1684351318 | 10.3054931118 | 0.1169364164  |
| H58 | -2.8608293528 | 9.4948114977  | 1.6851086383  |
| H59 | -1.7721728772 | 9.1994710230  | 0.3128834912  |

**Table S 9** Cartesian Coordinates of Compound **25** for M06/6-311G\*\* calculation

| <b>M06/6-311G** calculation of Compound 25</b> |               |               |              |
|------------------------------------------------|---------------|---------------|--------------|
| <b>Cartesian Coordinates</b>                   |               |               |              |
| final geometry:                                |               |               |              |
| angstroms                                      |               |               |              |
| atom                                           | x             | y             | z            |
| N1                                             | 0.4052942635  | -6.1283641517 | 1.1074654596 |
| C2                                             | 1.2503658006  | -5.0027062279 | 1.5325688186 |
| C3                                             | 0.3862882060  | -3.8985570266 | 2.1672242127 |
| C4                                             | -0.7099913446 | -3.4952227195 | 1.2287989090 |

|     |               |               |               |
|-----|---------------|---------------|---------------|
| C5  | -1.5134132385 | -4.6415132469 | 0.7019068472  |
| C6  | -0.6428601766 | -5.7861710668 | 0.1567296197  |
| C7  | -1.5442712377 | -6.9621923792 | -0.1388338554 |
| C8  | 2.2307942585  | -4.5042716621 | 0.4856377063  |
| C9  | 1.2052754564  | -7.2545090158 | 0.6578377672  |
| C10 | 1.2158801650  | -2.7469406469 | 2.6975475674  |
| N11 | -0.8664519206 | -2.2529620627 | 0.9824577372  |
| N12 | -1.8474517391 | -1.8449596726 | 0.1389522838  |
| C13 | -1.9682459749 | -0.5386159768 | -0.1574284712 |
| N14 | -2.8860186321 | -0.1035428587 | -0.9488080112 |
| C15 | -2.7984755532 | 1.2715870235  | -1.0944393828 |
| C16 | -1.6523890363 | 1.8507509399  | -0.2775353900 |
| S17 | -0.7963768072 | 0.5926680670  | 0.5864314132  |
| O18 | -3.5156433611 | 1.9575238722  | -1.7700097270 |
| C19 | -1.3933509432 | 3.1592933905  | -0.2680100154 |
| C20 | -0.2954333134 | 3.7236699858  | 0.5166820071  |
| O21 | 0.4619371382  | 3.0840343510  | 1.2052711838  |
| O22 | -0.2312916048 | 5.0539817681  | 0.3777311051  |
| C23 | 0.8086087105  | 5.6918331409  | 1.1087543751  |
| C24 | -1.8791531098 | -7.2764240487 | -1.4492601257 |
| C25 | -2.7538683973 | -8.3192215314 | -1.7263170921 |
| C26 | -3.2961787969 | -9.0619689493 | -0.6903239400 |
| C27 | -2.9606266669 | -8.7586325884 | 0.6236286228  |
| C28 | -2.0934313851 | -7.7144431438 | 0.8972538390  |
| C29 | 3.5794599334  | -4.8200654516 | 0.6346003906  |
| C30 | 4.5244582991  | -4.4246853805 | -0.2997298848 |
| C31 | 4.1339160551  | -3.6973005436 | -1.4129032258 |
| C32 | 2.7972671519  | -3.3657443891 | -1.5753001858 |
| C33 | 1.8561139491  | -3.7624012557 | -0.6367349614 |
| H34 | 1.8627660210  | -5.4033178792 | 2.3539939608  |
| H35 | -0.1165822877 | -4.4007171355 | 3.0108450252  |
| H36 | -2.1121775543 | -5.0396982878 | 1.5334680829  |
| H37 | -2.2212002425 | -4.3614255770 | -0.0860419686 |
| H38 | -0.2072165989 | -5.4615007172 | -0.8106107675 |
| H39 | 0.5888551248  | -8.1533972748 | 0.5846747177  |
| H40 | 1.6800187443  | -7.0823999634 | -0.3246306886 |
| H41 | 1.9984305481  | -7.4475948189 | 1.3865578854  |
| H42 | 0.5971479702  | -2.0468465377 | 3.2639217308  |
| H43 | 2.0046770981  | -3.1251856637 | 3.3565022736  |
| H44 | 1.6887555269  | -2.1844178606 | 1.8879609807  |
| H45 | -2.5271613319 | -2.4727756696 | -0.2847232178 |

|     |               |               |               |
|-----|---------------|---------------|---------------|
| H46 | -2.0234871762 | 3.8137895433  | -0.8624414832 |
| H47 | 0.7227572026  | 6.7547339944  | 0.8897141132  |
| H48 | 0.6933874819  | 5.5132218318  | 2.1810585655  |
| H49 | 1.7869580511  | 5.3163635076  | 0.7974999592  |
| H50 | -1.4454862733 | -6.6998820904 | -2.2633568789 |
| H51 | -3.0065608515 | -8.5537216546 | -2.7555578391 |
| H52 | -3.9770986671 | -9.8797884106 | -0.9036949951 |
| H53 | -3.3776777698 | -9.3423549765 | 1.4384482641  |
| H54 | -1.8126080059 | -7.4839923431 | 1.9221655836  |
| H55 | 3.8939365508  | -5.3896211659 | 1.5069422086  |
| H56 | 5.5686560696  | -4.6839197983 | -0.1554935435 |
| H57 | 4.8681617123  | -3.3829609917 | -2.1475978790 |
| H58 | 2.4822644024  | -2.7844042123 | -2.4361861493 |
| H59 | 0.8243091920  | -3.4590549047 | -0.7808432603 |

**Table S 10** Cartesian Coordinates of Compound **17** for M06/6-311G-3DF-3PD calculation

| <b>M06/6-311G-3DF-3PD calculation of Compound 17</b> |               |               |               |
|------------------------------------------------------|---------------|---------------|---------------|
| <b>Cartesian Coordinates</b>                         |               |               |               |
| final geometry:                                      |               |               |               |
|                                                      | angstroms     |               |               |
| atom                                                 | x             | y             | z             |
| N1                                                   | 4.2031946874  | -1.7925657029 | 1.1595720872  |
| C2                                                   | 3.7327805928  | -3.1025299977 | 1.6231889164  |
| C3                                                   | 2.3167540641  | -2.9828048685 | 2.2094691254  |
| C4                                                   | 1.4005332971  | -2.3353692961 | 1.2212962830  |
| C5                                                   | 1.9127292220  | -1.0442318400 | 0.6749449113  |
| C6                                                   | 3.3596105526  | -1.1424077844 | 0.1707945619  |
| C7                                                   | 3.8418988440  | 0.2480404438  | -0.1598404492 |
| C8                                                   | 5.5933926906  | -1.8376488698 | 0.7513997097  |
| C9                                                   | 3.8998459299  | -4.2339958350 | 0.6272928887  |
| C10                                                  | 1.8118485219  | -4.2941514140 | 2.7688960238  |
| N11                                                  | 0.3006122438  | -2.9115745942 | 0.9408389952  |
| N12                                                  | -0.5567671688 | -2.3700592177 | 0.0536276890  |
| C13                                                  | 4.1237105967  | 1.1630437401  | 0.8479414721  |
| C14                                                  | 4.5175222700  | 2.4502062220  | 0.5360806370  |
| C15                                                  | 4.6290644206  | 2.8436950791  | -0.7888063949 |
| C16                                                  | 4.3501918168  | 1.9403118357  | -1.7970064454 |
| C17                                                  | 3.9618101897  | 0.6478998779  | -1.4809500502 |
| C18                                                  | 3.1233045529  | -4.3756198598 | -0.5213547006 |
| C19                                                  | 3.3479763604  | -5.4149618985 | -1.4075883747 |
| C20                                                  | 4.3495253677  | -6.3386445383 | -1.1656637293 |
| C21                                                  | 5.1230100601  | -6.2184195084 | -0.0256459940 |
| C22                                                  | 4.8955747643  | -5.1766575887 | 0.8561358806  |

|     |               |               |               |
|-----|---------------|---------------|---------------|
| C23 | -1.7082644061 | -3.0175375167 | -0.2742579988 |
| N24 | -2.4851629388 | -2.4550692208 | -1.1175506232 |
| C25 | -3.6867511127 | -2.9872532720 | -1.5551546961 |
| C26 | -4.1059060715 | -4.2880728543 | -1.0164182798 |
| C27 | -3.4236039072 | -5.0151920500 | -0.1317955255 |
| S28 | -1.8850579859 | -4.5620699174 | 0.5678814063  |
| O29 | -4.3762298896 | -2.4053668743 | -2.3569965243 |
| C30 | -3.9898466563 | -6.3203761789 | 0.3151873180  |
| O31 | -3.1904967179 | -6.9210305380 | 1.1990550171  |
| O32 | -5.0278238289 | -6.7730380249 | -0.0685248449 |
| C33 | -3.6488607455 | -8.1758155073 | 1.6834691170  |
| H34 | 4.3819979995  | -3.3518287391 | 2.4710757580  |
| H35 | 2.4271831819  | -2.2608179836 | 3.0309957750  |
| H36 | 1.8884047254  | -0.3036539226 | 1.4819468078  |
| H37 | 1.3063252035  | -0.6396739038 | -0.1374335367 |
| H38 | 3.3569550976  | -1.7130630409 | -0.7764856726 |
| H39 | 5.9930079659  | -0.8297085444 | 0.6523329423  |
| H40 | 6.1763907342  | -2.3589652419 | 1.5111862482  |
| H41 | 5.7432356258  | -2.3586651869 | -0.2066346140 |
| H42 | 0.8744299276  | -4.1535362913 | 3.3053421342  |
| H43 | 1.6300062706  | -5.0236135271 | 1.9796235431  |
| H44 | 2.5459652065  | -4.7146876288 | 3.4584105024  |
| H45 | -0.4141988779 | -1.4751259092 | -0.4035066537 |
| H46 | 4.0510475099  | 0.8474506194  | 1.8829909445  |
| H47 | 4.7405604500  | 3.1525573747  | 1.3293500663  |
| H48 | 4.9363048333  | 3.8527478972  | -1.0319293339 |
| H49 | 4.4390695274  | 2.2379073789  | -2.8340485235 |
| H50 | 3.7516766633  | -0.0636570175 | -2.2723966185 |
| H51 | 2.3139518048  | -3.6876719209 | -0.7285404602 |
| H52 | 2.7288947199  | -5.5055645463 | -2.2911546752 |
| H53 | 4.5214992908  | -7.1508995291 | -1.8600841879 |
| H54 | 5.9058321580  | -6.9375290644 | 0.1799215478  |
| H55 | 5.5066611103  | -5.0888230900 | 1.7486908077  |
| H56 | -5.0509836132 | -4.6740874412 | -1.3791993740 |
| H57 | -2.8965488964 | -8.5264086936 | 2.3819779398  |
| H58 | -4.6098433488 | -8.0639068369 | 2.1833321616  |
| H59 | -3.7650986226 | -8.8822608245 | 0.8629433932  |

**Table S 11** Cartesian Coordinates of Compound **25** for M06/6-311G-3DF-3PD calculation

| <b>M06/6-311G-3DF-3PD calculation of Compound 25</b> |              |              |              |
|------------------------------------------------------|--------------|--------------|--------------|
| <b>Cartesian Coordinates</b>                         |              |              |              |
| final geometry:                                      |              |              |              |
|                                                      | angstroms    |              |              |
| atom                                                 | x            | y            | z            |
| N1                                                   | 0.0798585784 | 0.0366694130 | 1.0998632208 |
| C2                                                   | 1.2483859497 | 0.8983458956 | 1.3107685760 |



|     |               |               |               |
|-----|---------------|---------------|---------------|
| C3  | 0.4594041945  | -1.2604901748 | 0.5751077252  |
| C4  | -1.0118029212 | 0.6372123051  | 0.3525552056  |
| C5  | 0.8335979468  | 2.1939628406  | 2.0261316610  |
| C6  | 2.1239358176  | 1.1130737903  | 0.0911027892  |
| C7  | -0.2816090264 | 2.8632974354  | 1.2884450586  |
| C8  | 2.0144803196  | 3.0889301190  | 2.3299141480  |
| C9  | -1.4381963791 | 1.9648659098  | 0.9972909602  |
| N10 | -0.1570560921 | 4.0952941351  | 0.9902133607  |
| C11 | -2.2144760472 | -0.2704910721 | 0.2858980182  |
| C12 | -2.8351274835 | -0.5191487249 | -0.9277165198 |
| C13 | -2.7413952500 | -0.8400050489 | 1.4397184669  |
| C14 | 3.3548921337  | 0.4686894827  | 0.0390880351  |
| C15 | 1.7650123010  | 1.9147727411  | -0.9912091558 |
| N16 | -1.1438458692 | 4.7440771806  | 0.3256141001  |
| C17 | -0.9779225282 | 6.0290607816  | -0.0261110144 |
| N18 | -1.8874397700 | 6.6844273719  | -0.6538876857 |
| S19 | 0.5558749594  | 6.8143355869  | 0.3991743450  |
| C20 | -1.4778917052 | 7.9822481937  | -0.9041917824 |
| C21 | -0.0768541249 | 8.2454059067  | -0.3641164581 |
| O22 | -2.1158524138 | 8.8213699624  | -1.4712589594 |
| C23 | 0.4898952074  | 9.4407184762  | -0.5106294627 |
| C24 | 1.8157136626  | 9.8669558399  | -0.0599154425 |
| O25 | 2.4871179319  | 8.8865489526  | 0.5690977844  |
| O26 | 2.2615233467  | 10.9676292149 | -0.2295469224 |
| C27 | 3.7817690374  | 9.2386445963  | 1.0310600393  |
| C28 | -3.9689423637 | -1.3135421276 | -0.9933752709 |
| C29 | -4.4876101928 | -1.8737245661 | 0.1588660711  |
| C30 | -3.8683394702 | -1.6369877675 | 1.3767384769  |
| C31 | 4.1963664230  | 0.6011403043  | -1.0513304915 |
| C32 | 3.8192182535  | 1.3912840679  | -2.1217107856 |
| C33 | 2.6021712766  | 2.0489727999  | -2.0852380642 |
| H34 | 1.8714911715  | 0.3546767895  | 2.0307475355  |
| H35 | -0.3691793067 | -1.9617082156 | 0.6589432850  |
| H36 | 0.7688601754  | -1.2231157747 | -0.4804856711 |
| H37 | 1.2945898492  | -1.6535308075 | 1.1555892711  |
| H38 | -0.7072803470 | 0.8418904884  | -0.6905699665 |
| H39 | 0.3922045800  | 1.8476329512  | 2.9718726533  |
| H40 | 1.7183483940  | 3.9210792811  | 2.9668544222  |
| H41 | 2.7915837049  | 2.5195665143  | 2.8425807685  |
| H42 | 2.4451149426  | 3.5094316537  | 1.4213587100  |
| H43 | -2.1974299741 | 2.4149472005  | 0.3552321928  |
| H44 | -1.9305782460 | 1.7320870395  | 1.9476540787  |
| H45 | -2.4228995185 | -0.0867715599 | -1.8332347587 |
| H46 | -2.2461181574 | -0.6666332330 | 2.3889387096  |
| H47 | 3.6579389331  | -0.1528091820 | 0.8756800092  |
| H48 | 0.8337320614  | 2.4655789613  | -0.9850914359 |
| H49 | -2.0272111257 | 4.3140340623  | 0.0714407942  |
| H50 | -0.0885815386 | 10.2002994122 | -1.0241859179 |
| H51 | 4.1886731442  | 8.3536782005  | 1.5096639085  |

|     |               |               |               |
|-----|---------------|---------------|---------------|
| H52 | 4.4158678933  | 9.5457930986  | 0.2002940218  |
| H53 | 3.7252383583  | 10.0620872848 | 1.7419058426  |
| H54 | -4.4436577790 | -1.4970984395 | -1.9487147233 |
| H55 | -5.3709721129 | -2.4973246058 | 0.1107114268  |
| H56 | -4.2667960596 | -2.0788042347 | 2.2813222833  |
| H57 | 5.1488413196  | 0.0866312903  | -1.0628894493 |
| H58 | 4.4720792045  | 1.4998798912  | -2.9780398969 |
| H59 | 2.3020601529  | 2.6798521708  | -2.9122757343 |
